# Supplementary material for: Fluoxetine scaffold to design tandem molecular antioxidants and green catalysts
Source: Royal Society of Chemistry journal article supplement (doi:10.1039/d0ra03509b), 2020-01-01
Supplement: d0ra03509b1.pdf [file d0ra03509b1.pdf]

**- SUPPLEMENTARY INFORMATION -**

**Fluoxetine Scaffold to Design Tandem Molecular Antioxidants and Green Catalysts**

Giovanni Ribaudò<sup>1</sup>, Marco Bortoli<sup>2</sup>, Alberto Ongaro<sup>1</sup>, Erika Oselladore<sup>3</sup>, Alessandra Gianoncelli<sup>1</sup>, Giuseppe Zagotto<sup>3</sup> and Laura Orian<sup>2\*</sup>

<sup>1</sup> Dipartimento di Medicina Molecolare e Traslazionale, Università degli Studi di Brescia, Viale Europa 11, 25123 Brescia - Italy

<sup>2</sup> Dipartimento di Scienze Chimiche, Università degli Studi di Padova, Via Marzolo 1, 35131 Padova - Italy

<sup>3</sup> Dipartimento di Scienze del Farmaco, Università degli Studi di Padova, Via Marzolo 5, 35131 Padova – Italy

<sup>1</sup> Corresponding author: Prof. Laura Orian, Dipartimento di Scienze Chimiche, Università degli Studi di Padova, Via Marzolo 1, 35131 Padova - Italy. E-mail: [laura.orian@unipd.it](mailto:laura.orian@unipd.it).

# Chemistry

## NMR and ESI-MS spectra

### Compound 2

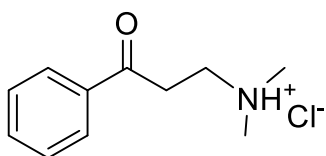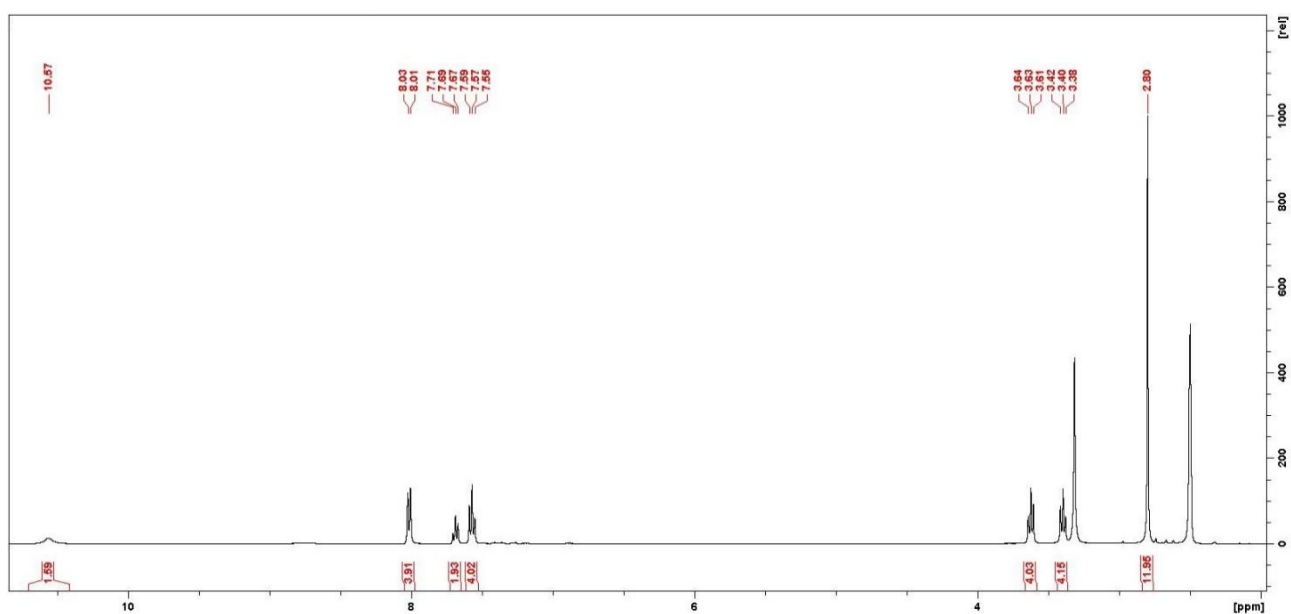

Figure S1. 1H-NMR spectrum of compound 2.

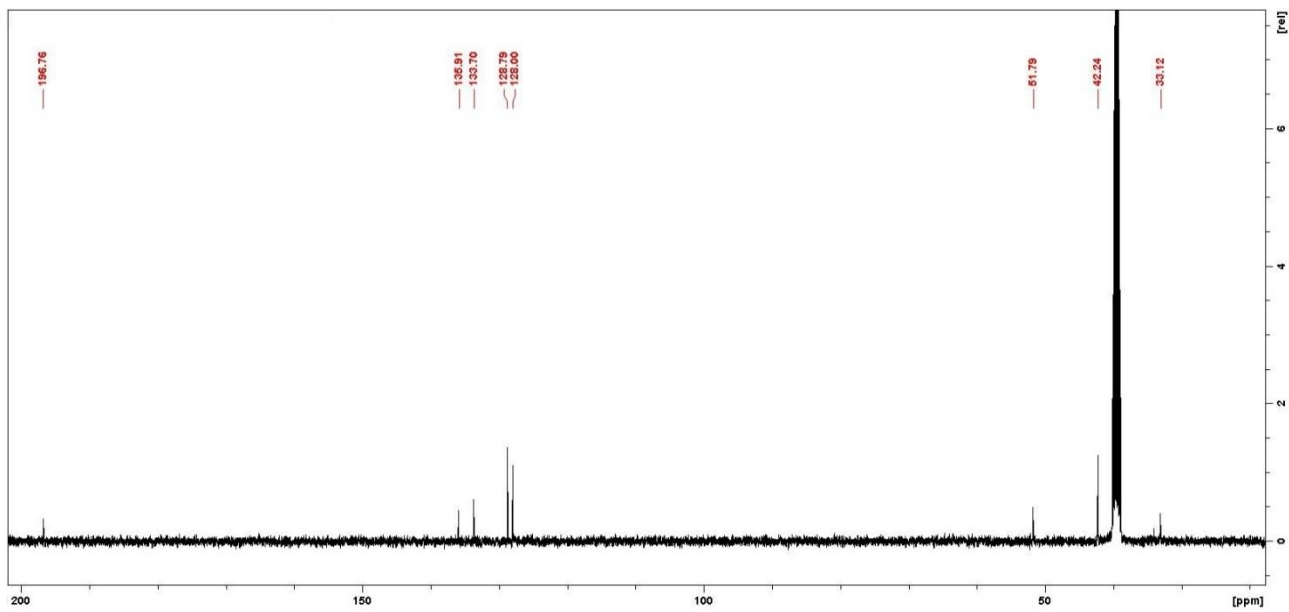

Figure S2. <sup>13</sup>C-NMR spectrum of compound 2.

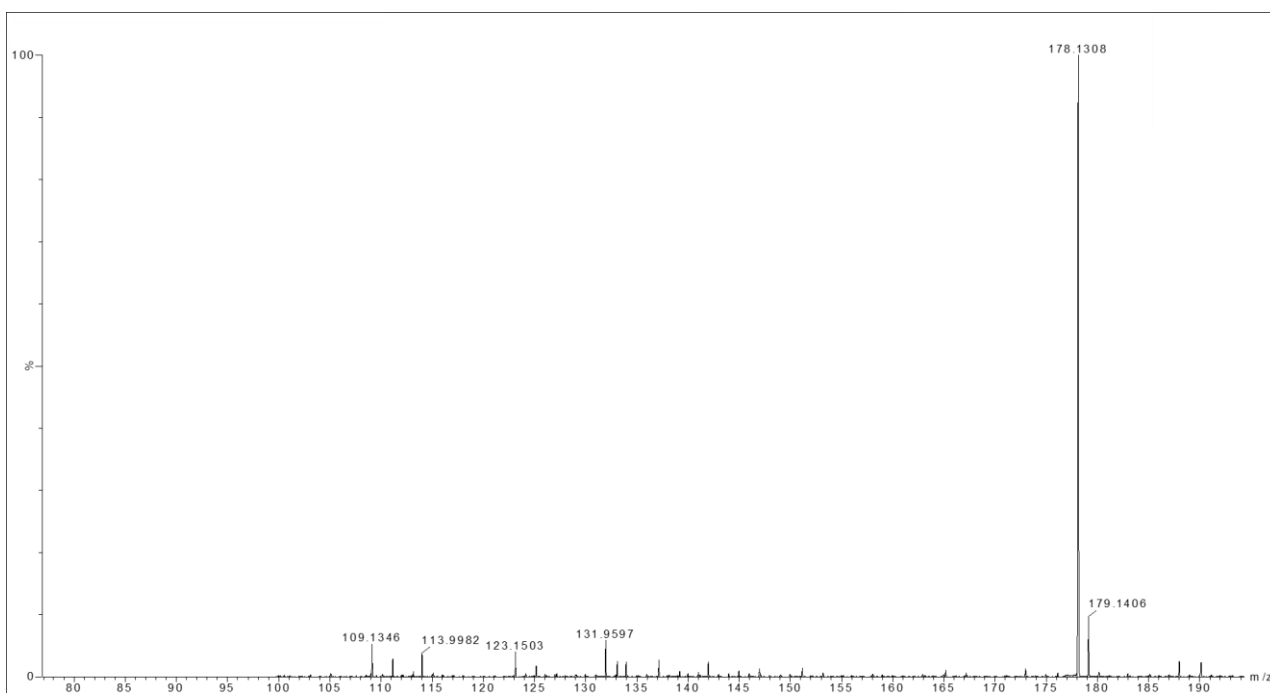

Figure S3. HRMS ESI spectrum of compound 2.

Compound 3

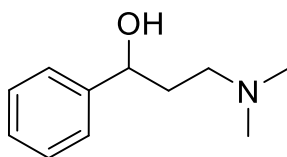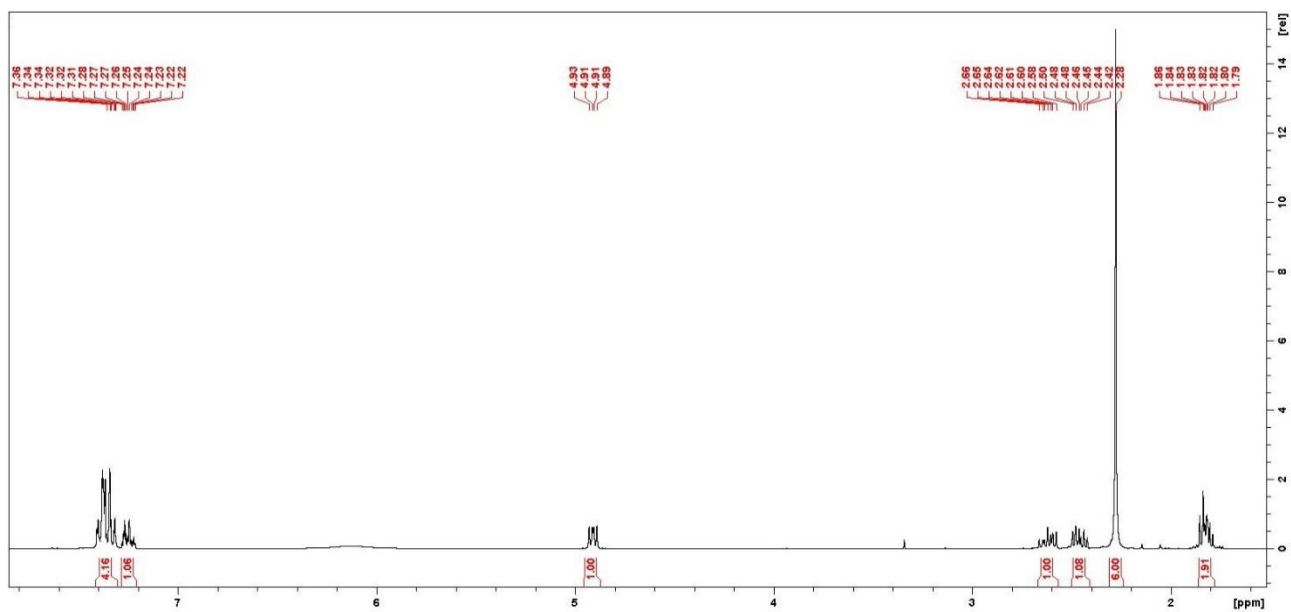

Figure S4. <sup>1</sup>H-NMR spectrum of compound 3.

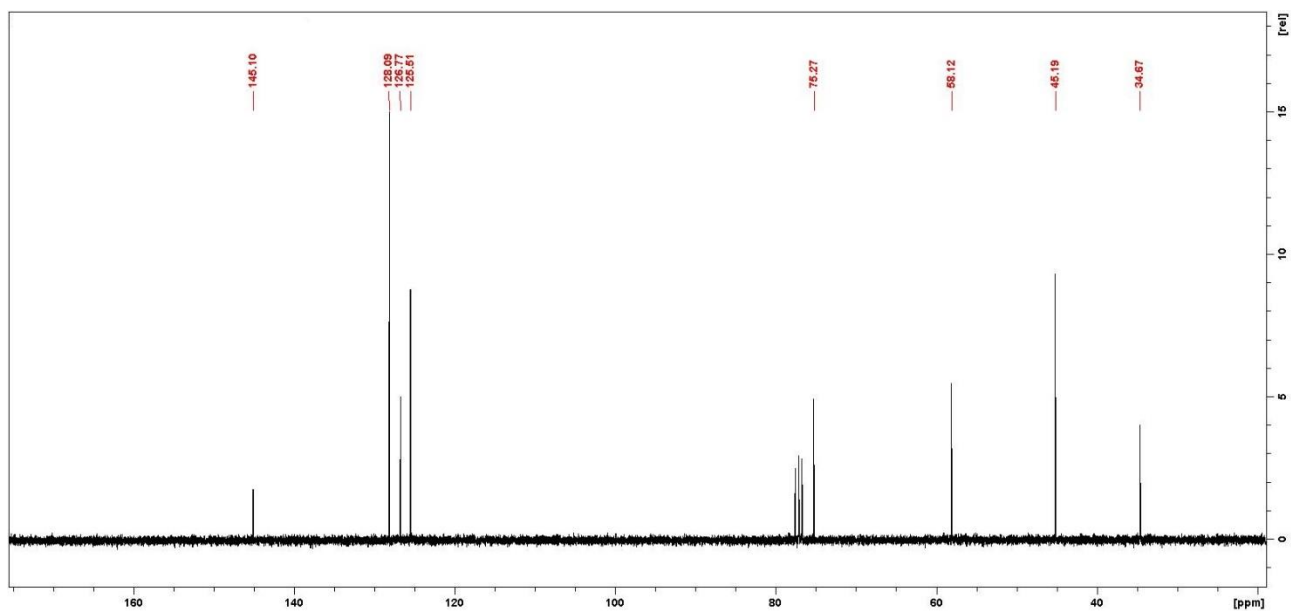

Figure S5. <sup>13</sup>C-NMR spectrum of compound 3.

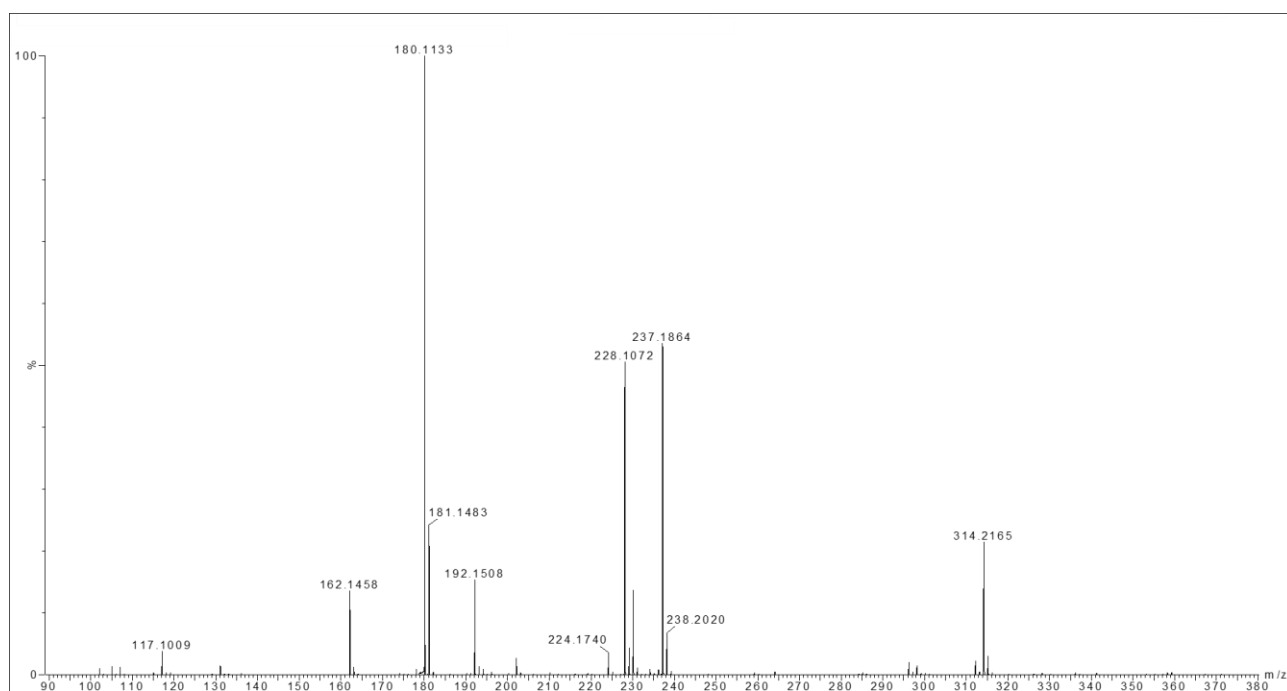

Figure S6. HRMS ESI spectrum of compound 3.

Compound 4

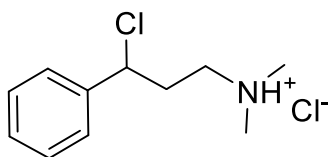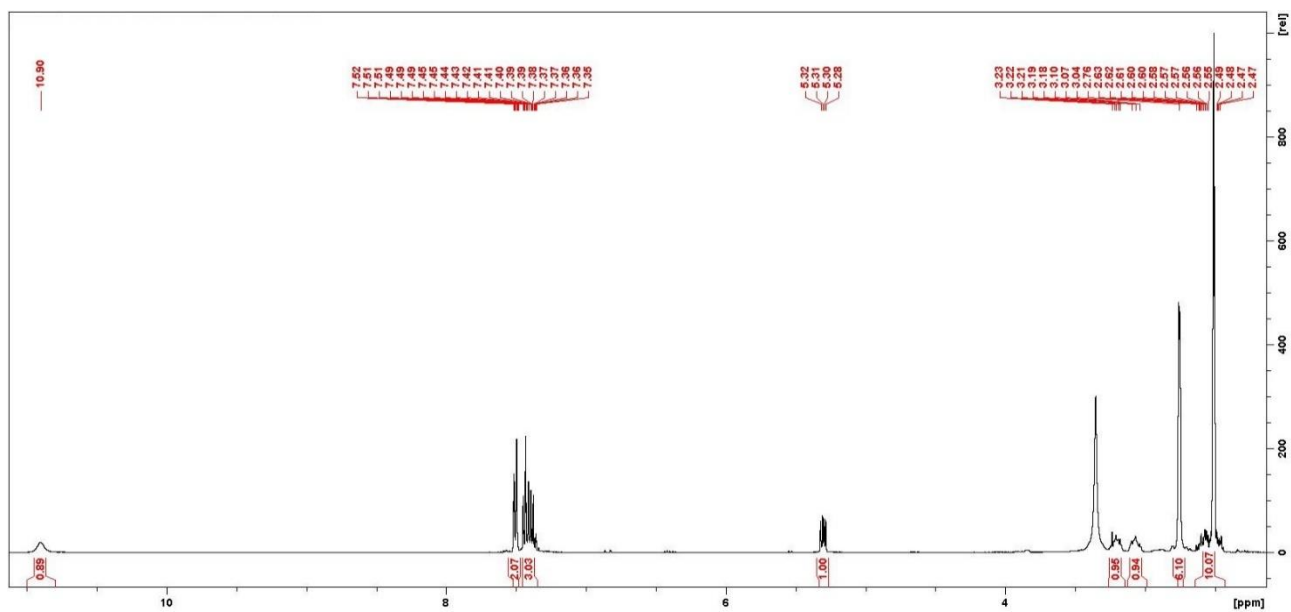

Figure S7. <sup>1</sup>H-NMR spectrum of compound 4.

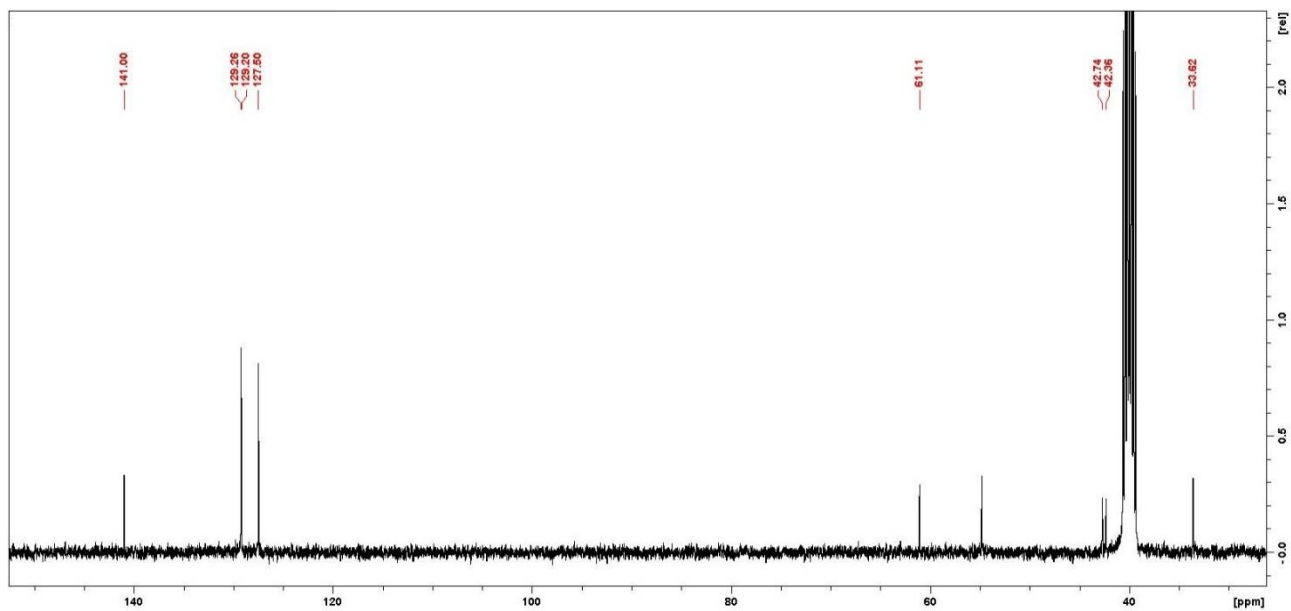

Figure S8. <sup>13</sup>C-NMR spectrum of compound 4.

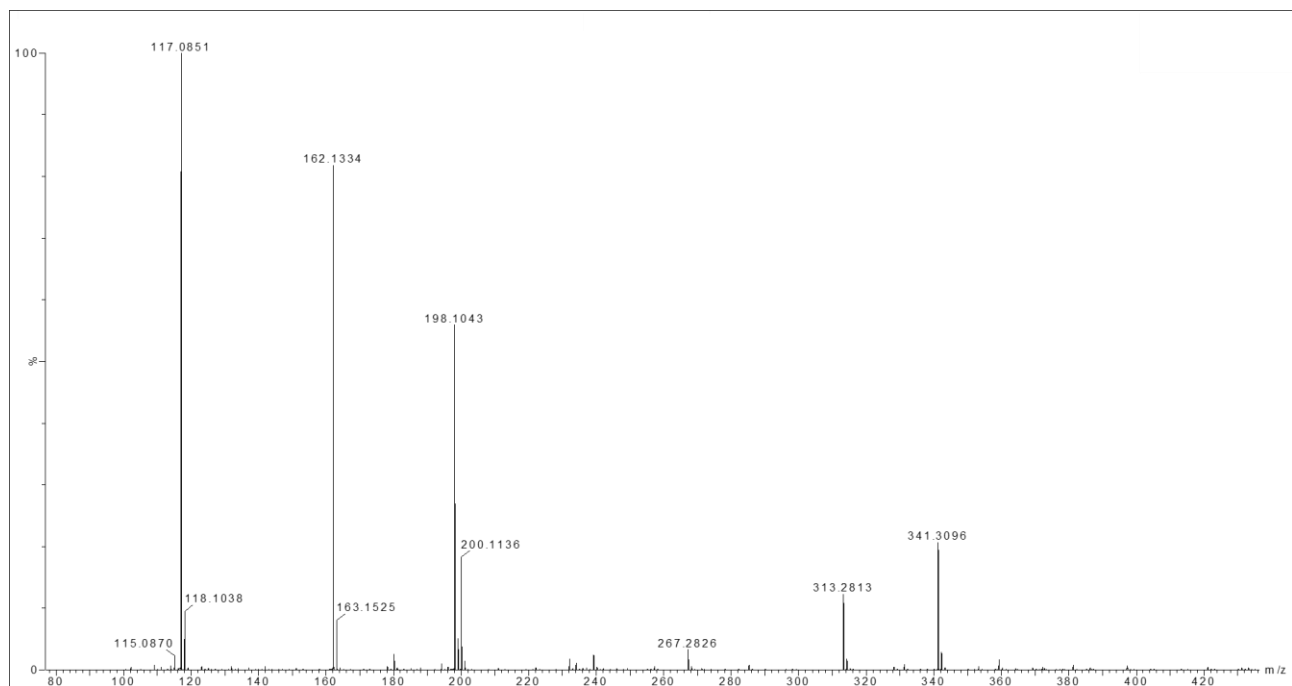

Figure S9. HRMS ESI spectrum of compound 4.

Compound 5

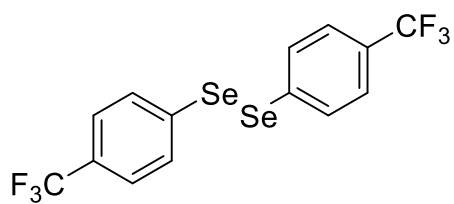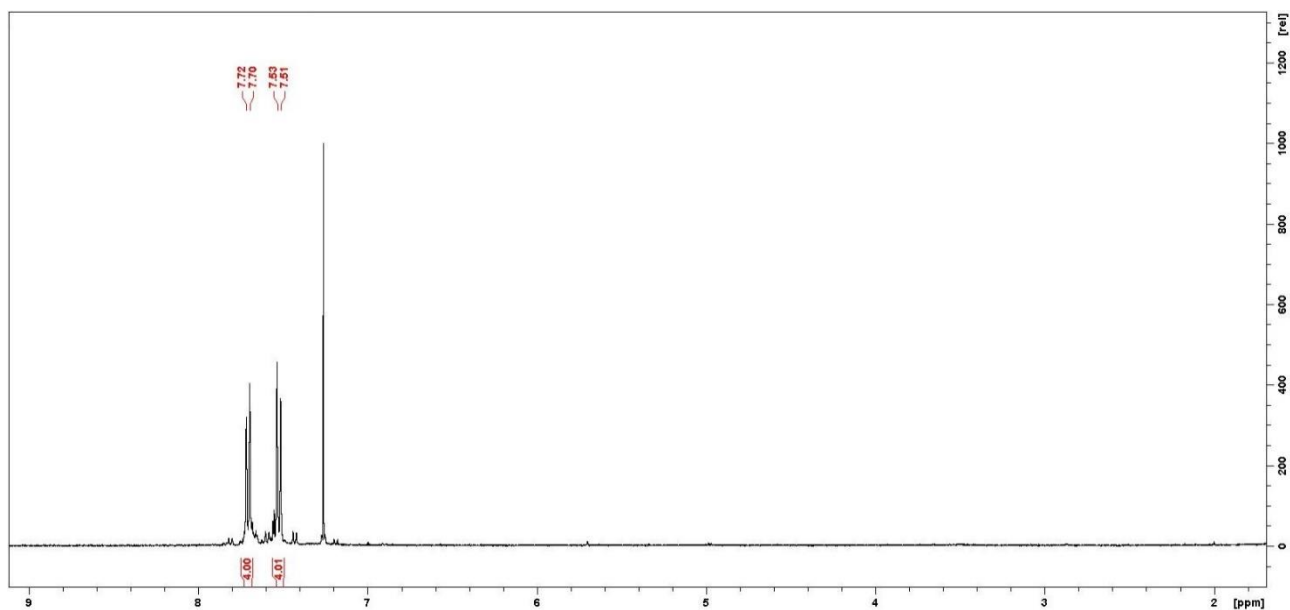

Figure S10. <sup>1</sup>H-NMR spectrum of compound 5.

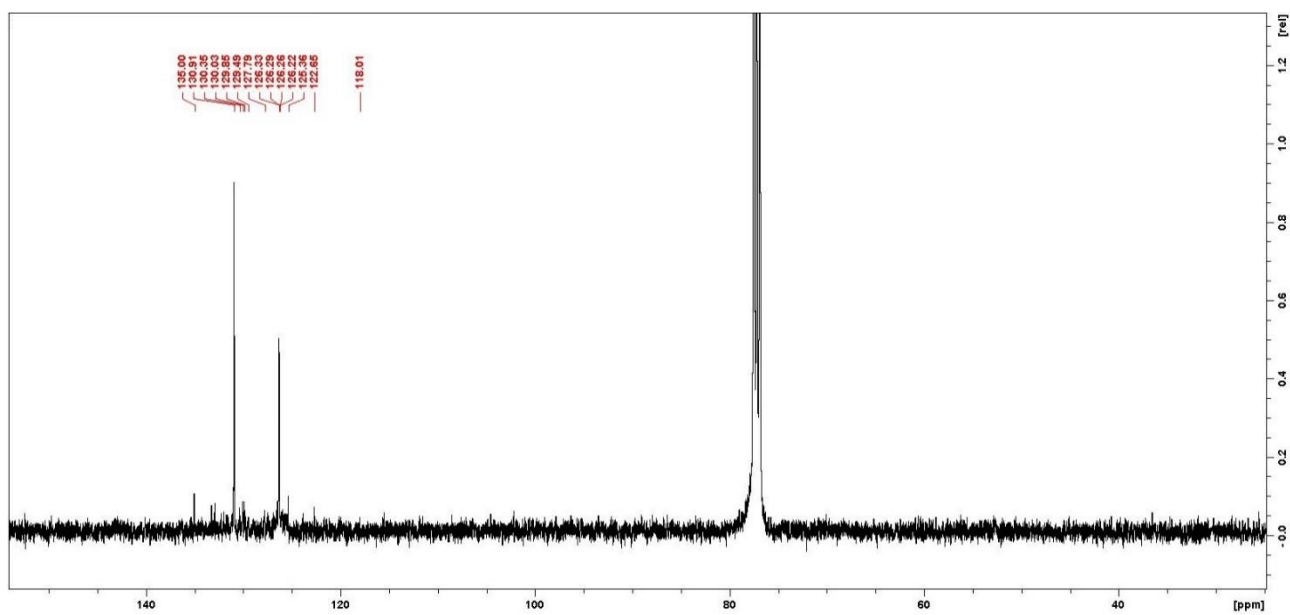

Figure S11. <sup>13</sup>C-NMR spectrum of compound 5.



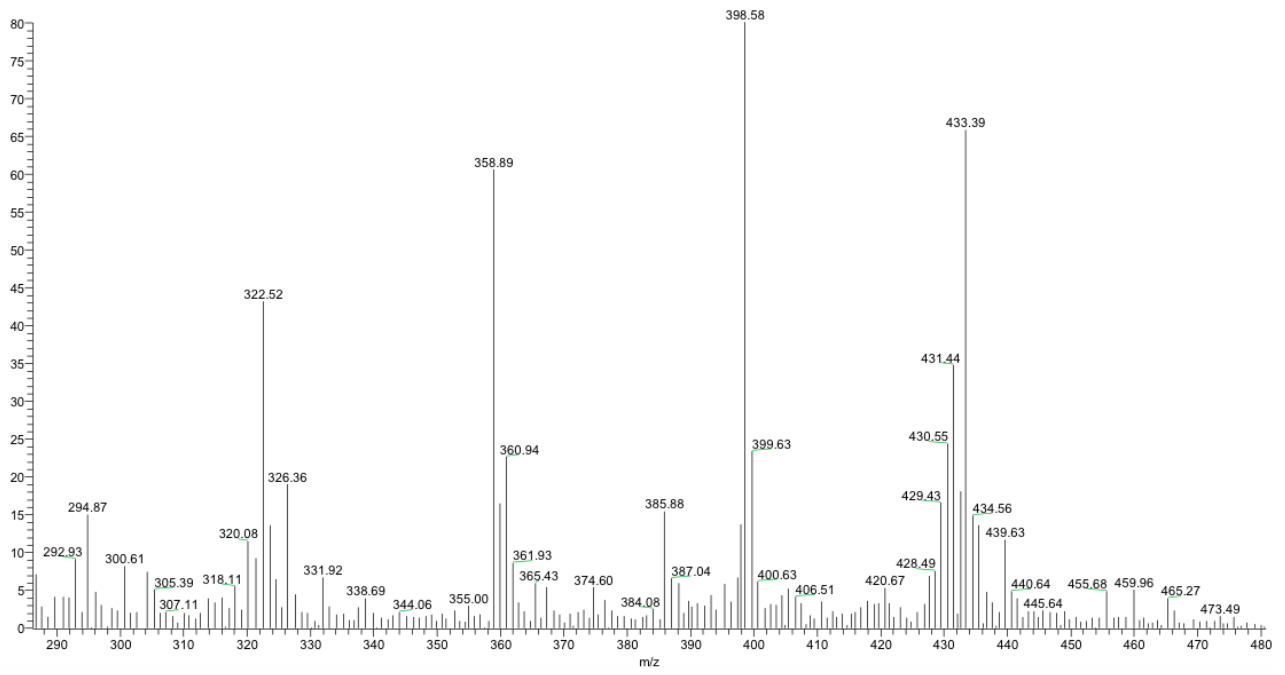

Figure S12. ESI-MS spectrum of compound 5.



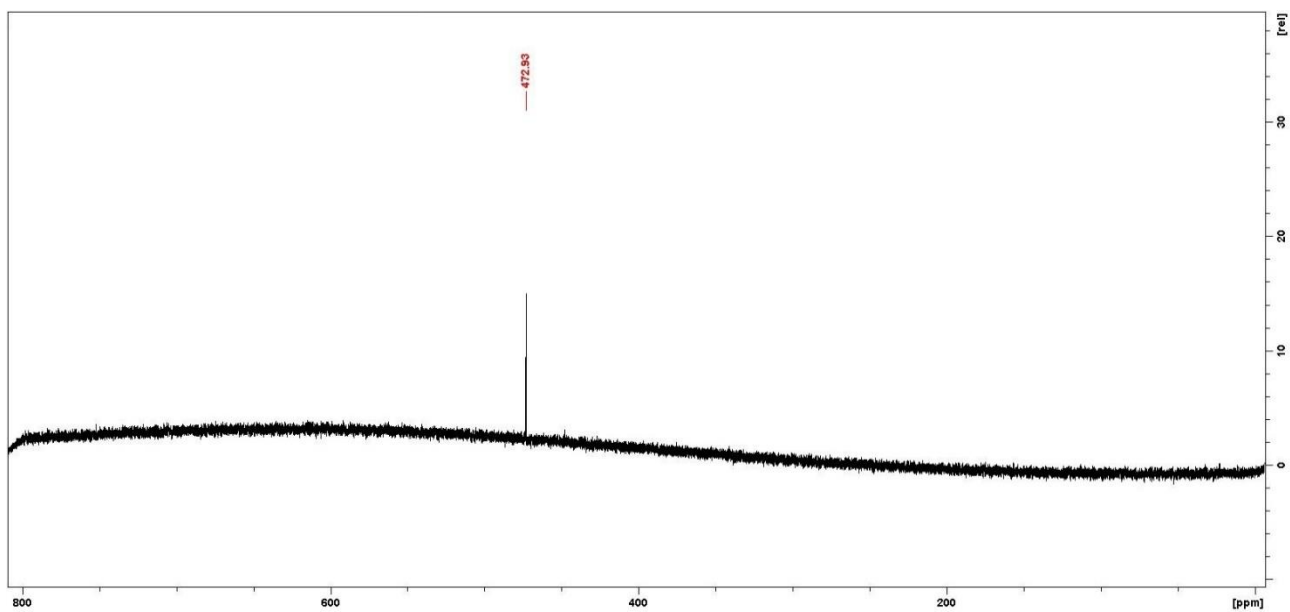

Figure S15.  $^{77}\text{Se}$ -NMR spectrum of compound 1- $\text{CF}_3$ .

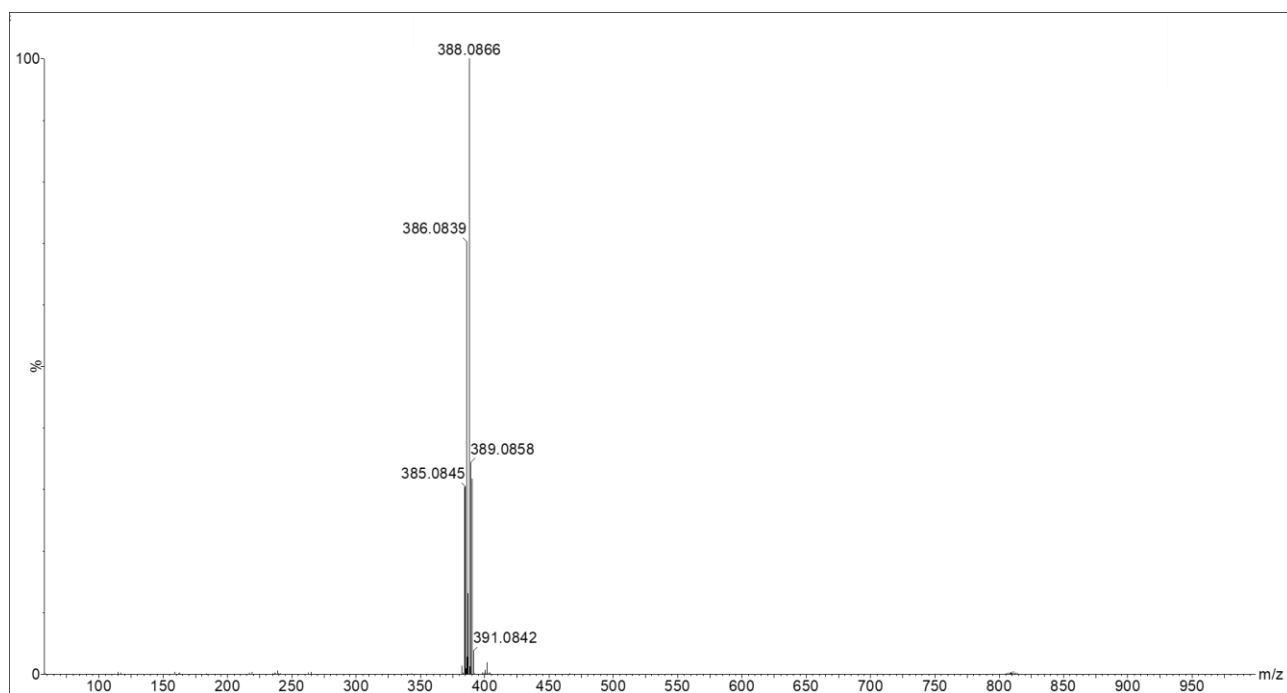

Figure S16. HRMS ESI spectrum of compound 1- $\text{CF}_3$ .

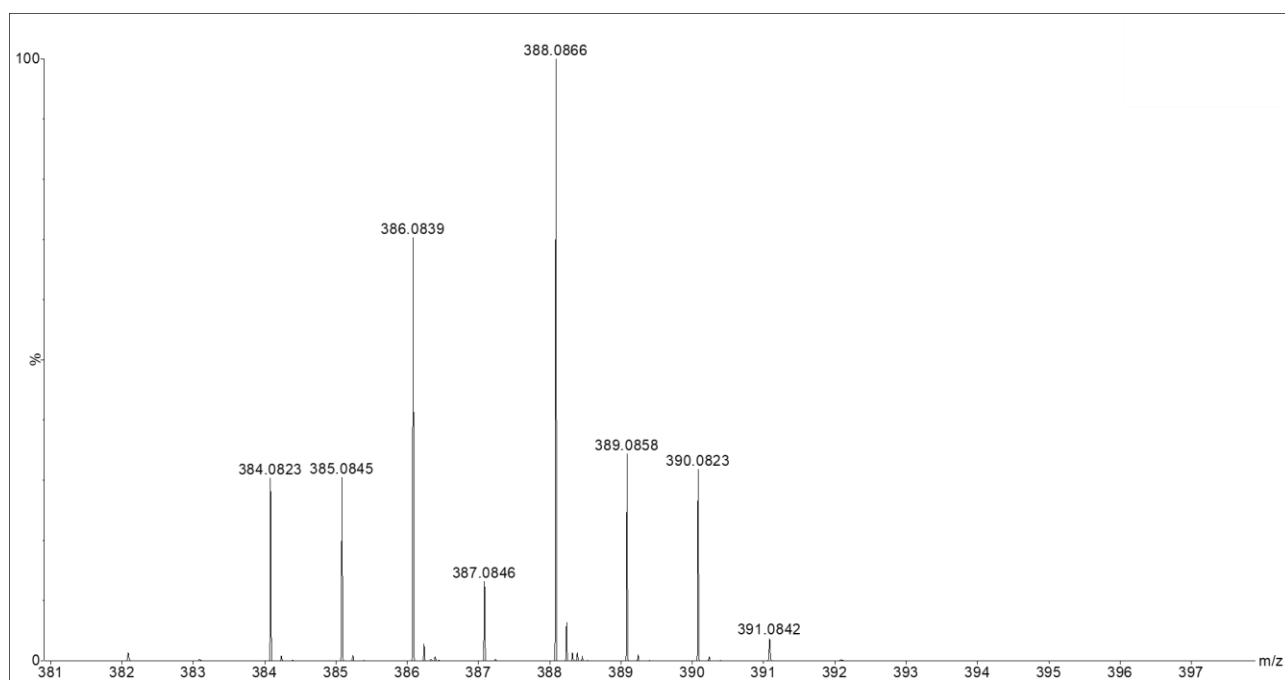

Figure S17. Detailed HRMS spectrum showing the isotopic distribution of compound 1-CF<sub>3</sub>.

Compound 1-H

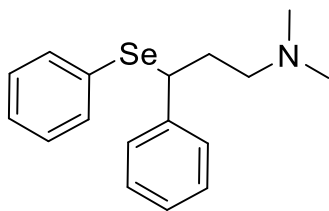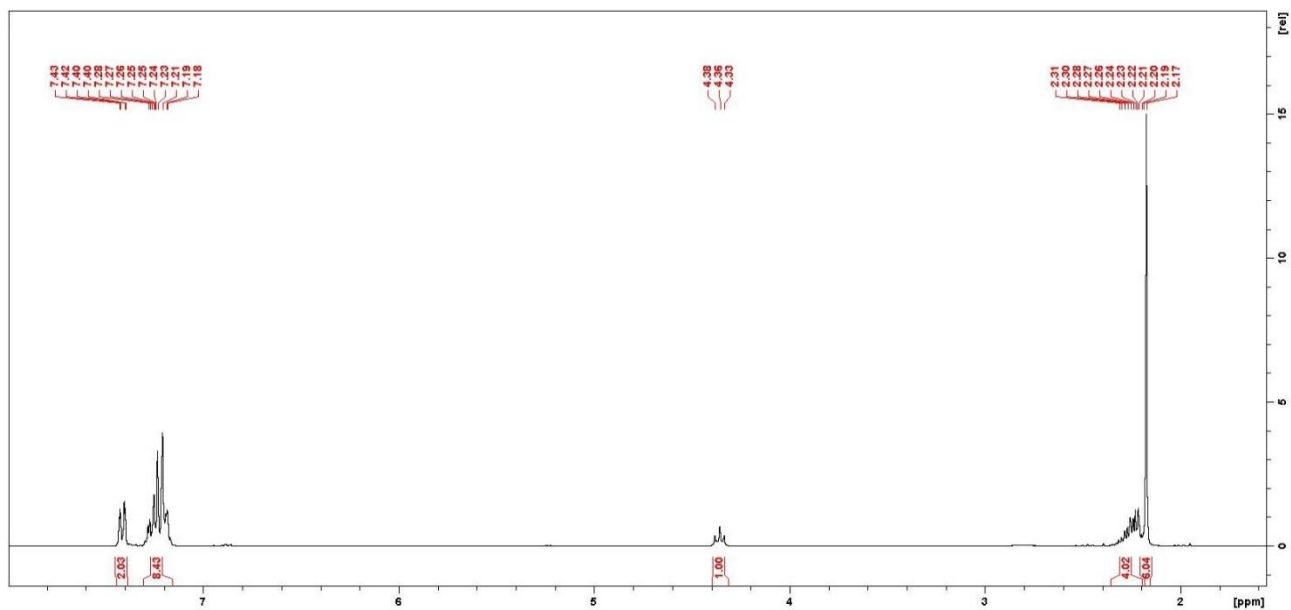

Figure S18. <sup>1</sup>H-NMR spectrum of compound 1-H.

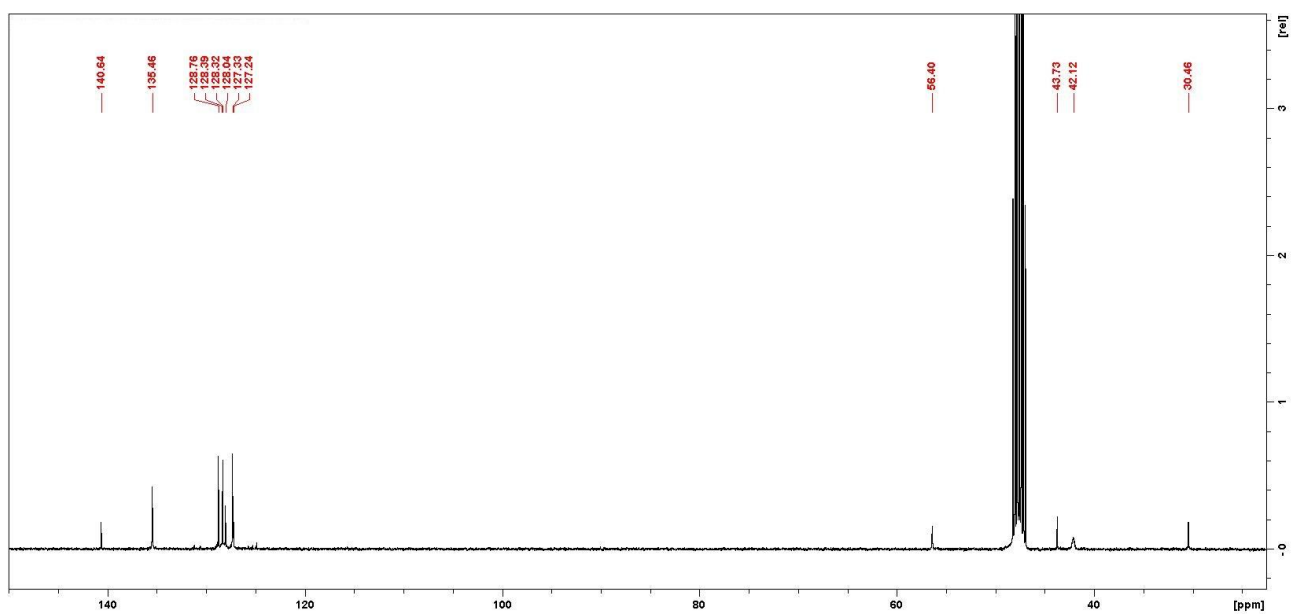

Figure S19. <sup>13</sup>C-NMR spectrum of compound 1-H.

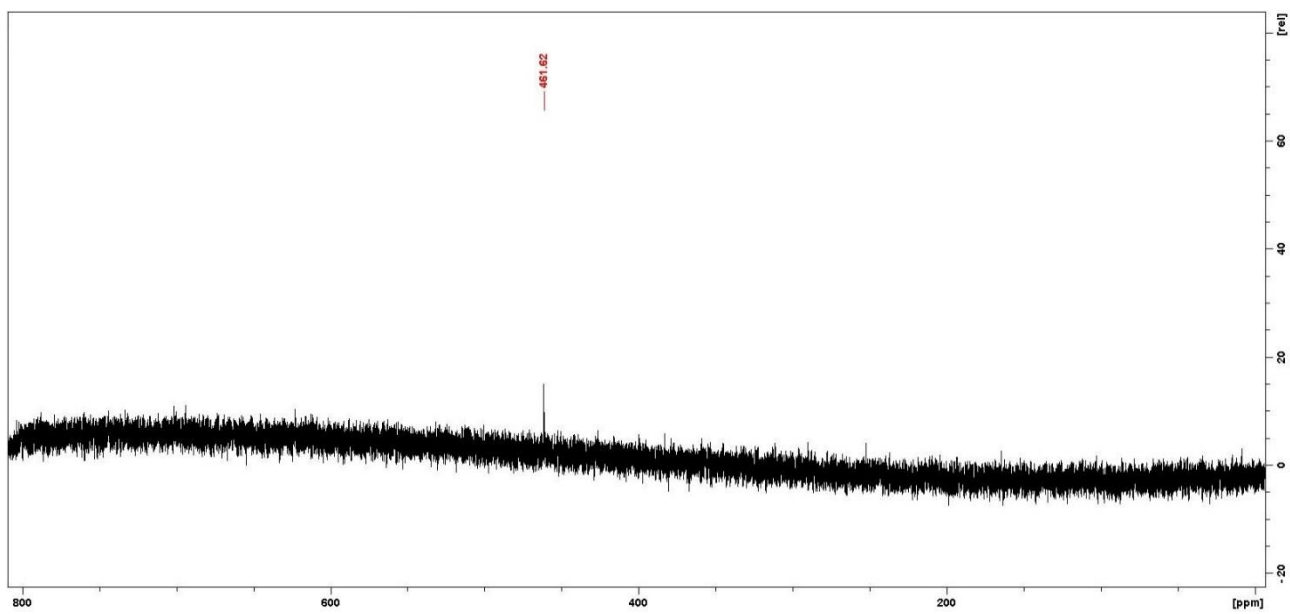

Figure S20.  $^{77}\text{Se}$ -NMR spectrum of compound 1-H.

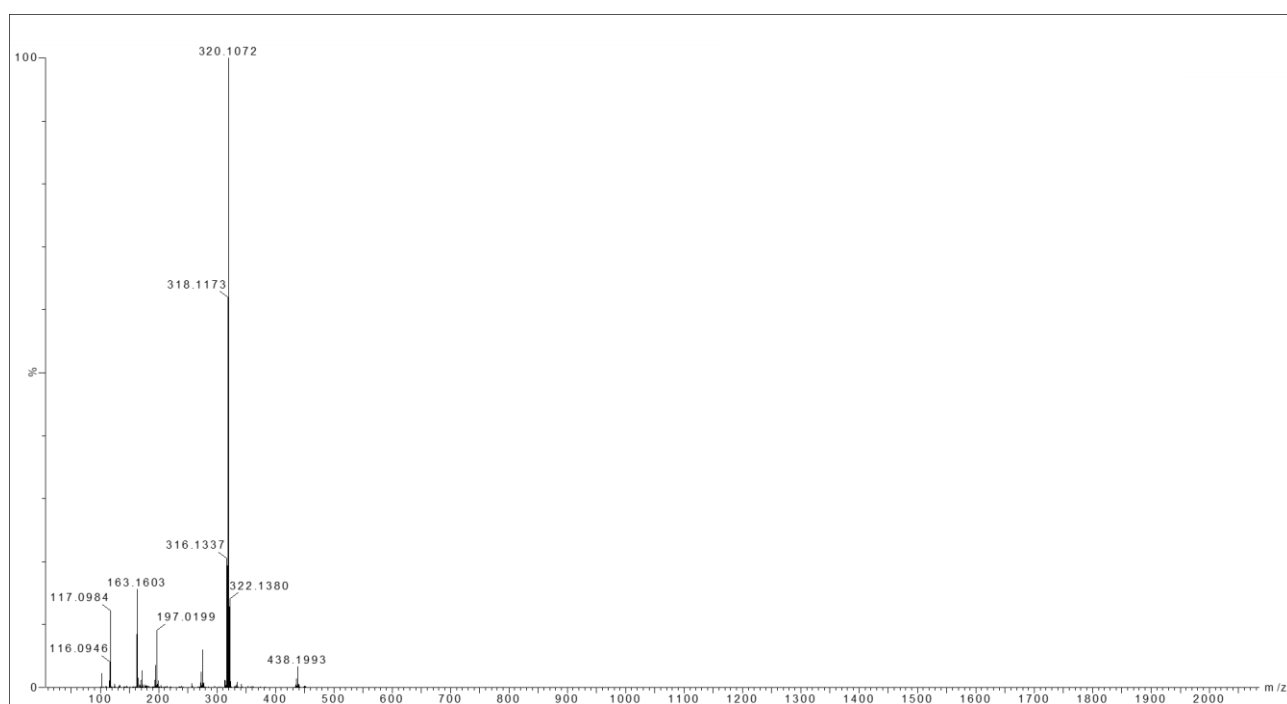

Figure S21. HRMS ESI spectrum of compound 1-H.

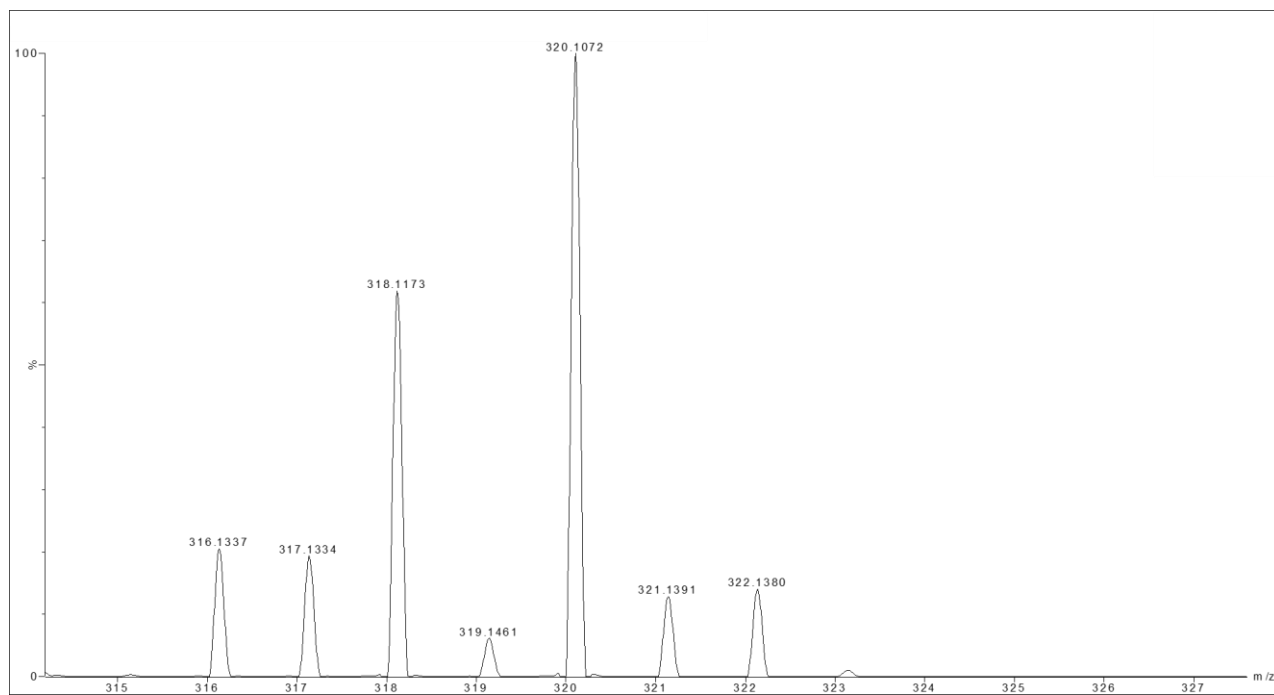

Figure S22. Detailed HRMS spectrum showing the isotopic distribution of compound 1-H.

## NMR study of the reaction with H<sub>2</sub>O<sub>2</sub>

### Compound 1-CF<sub>3</sub>

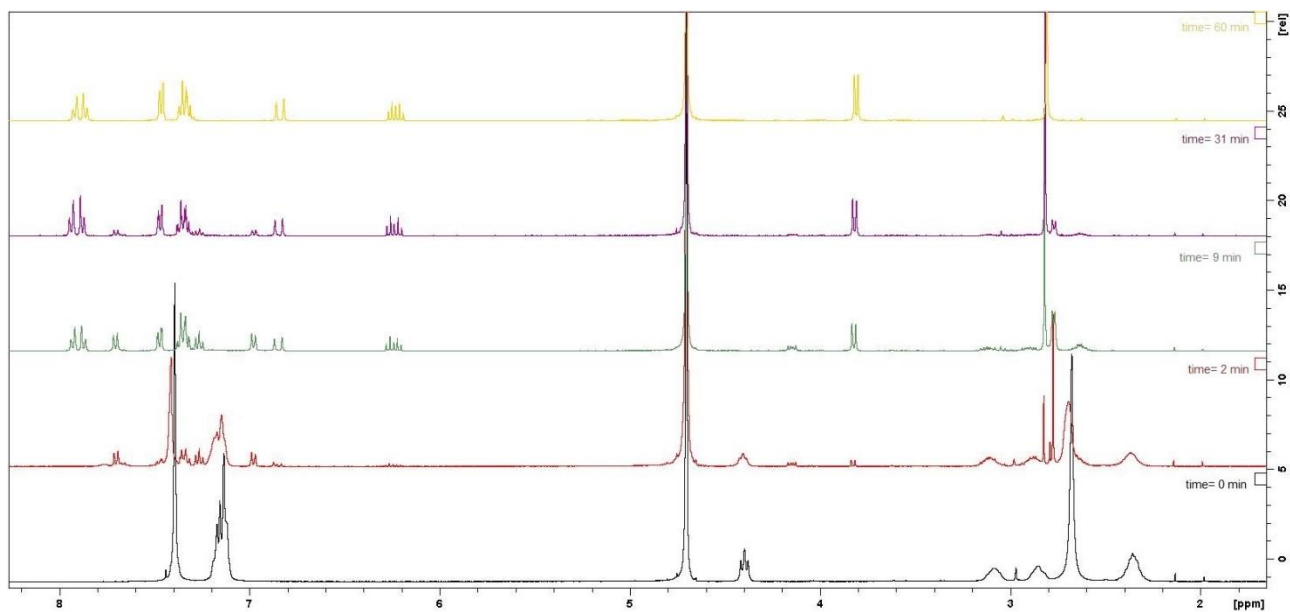

Figure S23. Variation over time of the <sup>1</sup>H-NMR spectra during the oxidation-reaction of compound 1-CF<sub>3</sub>.

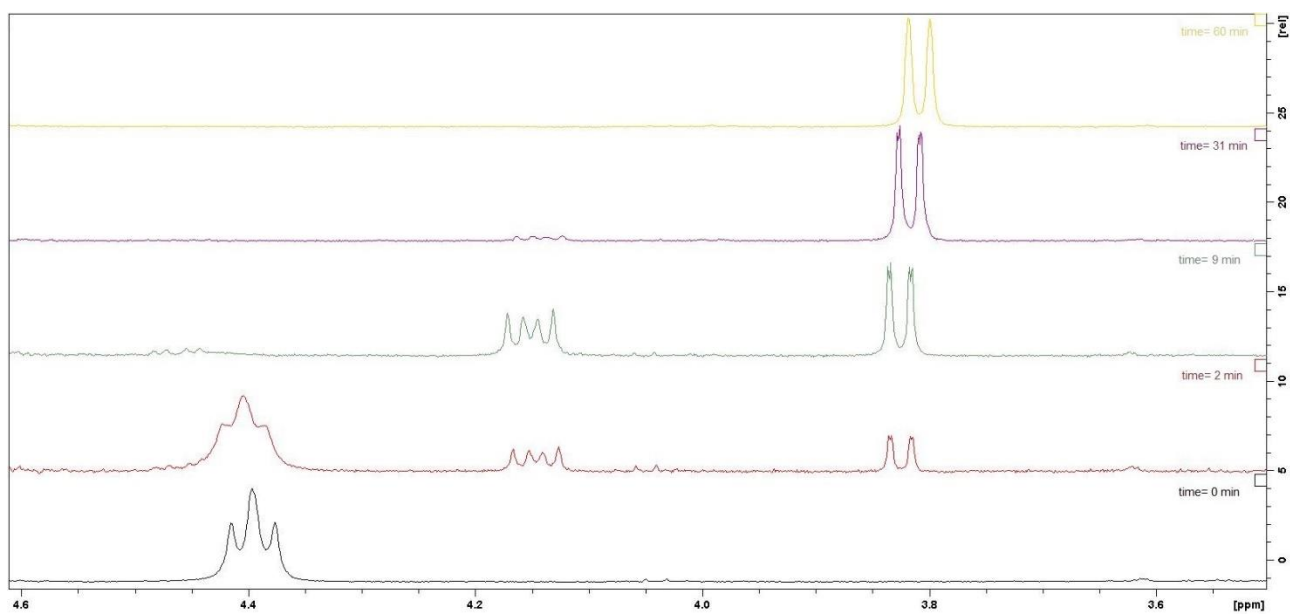

Figure S24. Variation over time of the <sup>1</sup>H-NMR spectra during the oxidation-reaction of compound 1-CF<sub>3</sub>, focus on the region between 4.6 and 3.5 ppm (area of interest to integrate for relative abundance over time calculation).



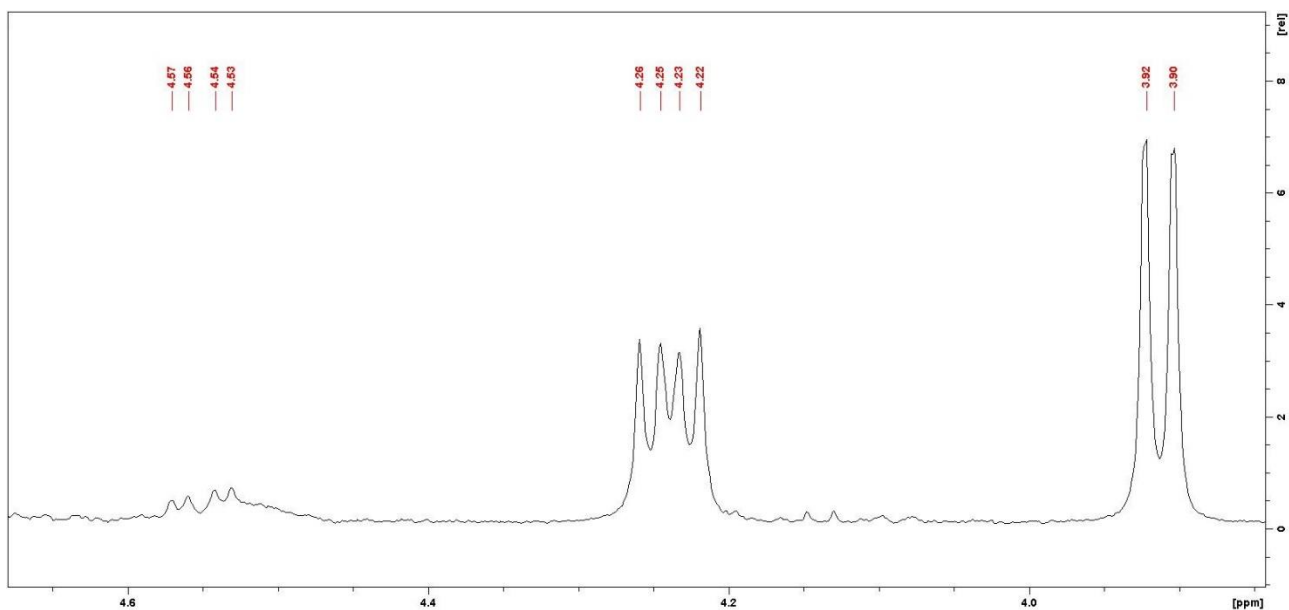

Figure S25.  $^1\text{H}$ -NMR spectrum during the oxidation-reaction of compound 1- $\text{CF}_3$  at  $t = 9$  min, focus on the region between 4.6 and 3.5 ppm (the signal corresponding to the other diastereoisomer of the selenoxide is detectable at 4.46 ppm after the disappearance of the starting material).

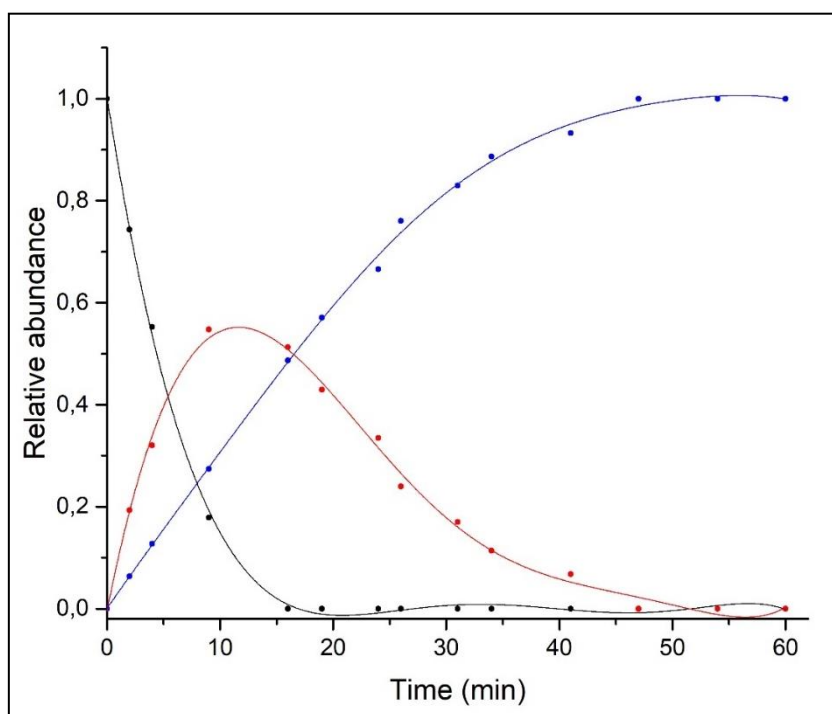

Figure S26.  $^1\text{H}$ -NMR study of the reaction with  $\text{H}_2\text{O}_2$  of compound 1- $\text{CF}_3$ . This graph was obtained by integration of the  $\alpha$ -hydrogen signals for the starting material and the two diastereoisomers and the allylic-hydrogens signals for the cinnamylamine in the  $^1\text{H}$ -NMR spectra acquired at different time points (• starting material, • diastereoisomer R-R/S-S, • amine).



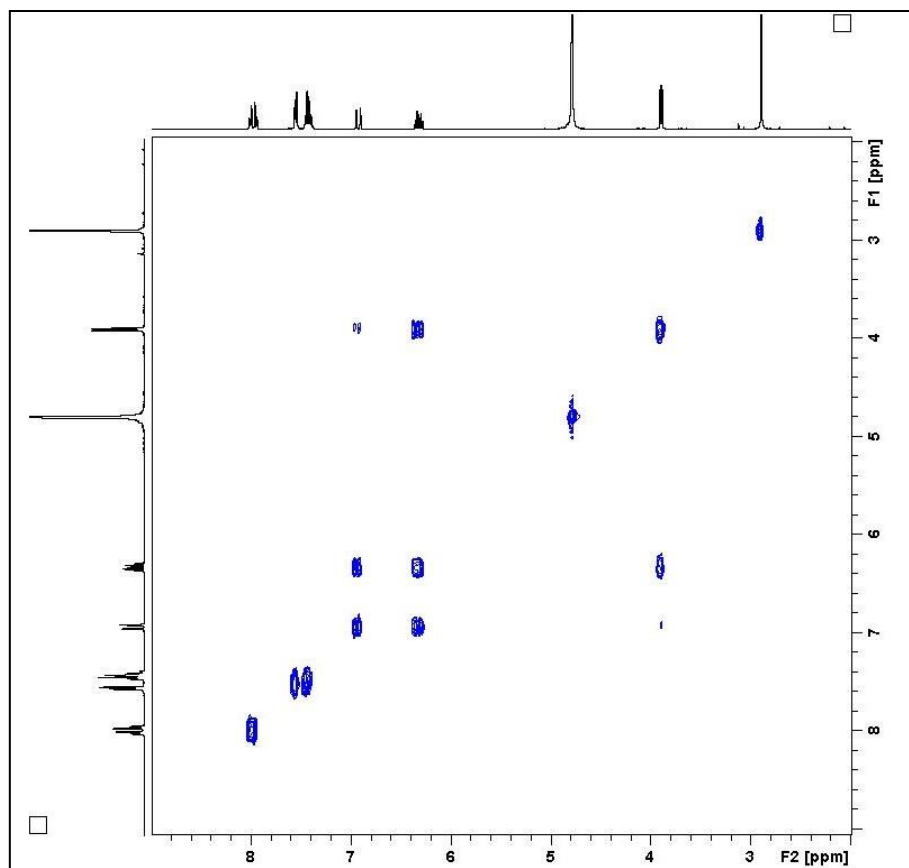

Figure S29. COSY-NMR spectrum of cinnamylamine 6 and seleninic acid 7 after the oxidation reaction of 1-CF<sub>3</sub> in D<sub>2</sub>O, 400 MHz.

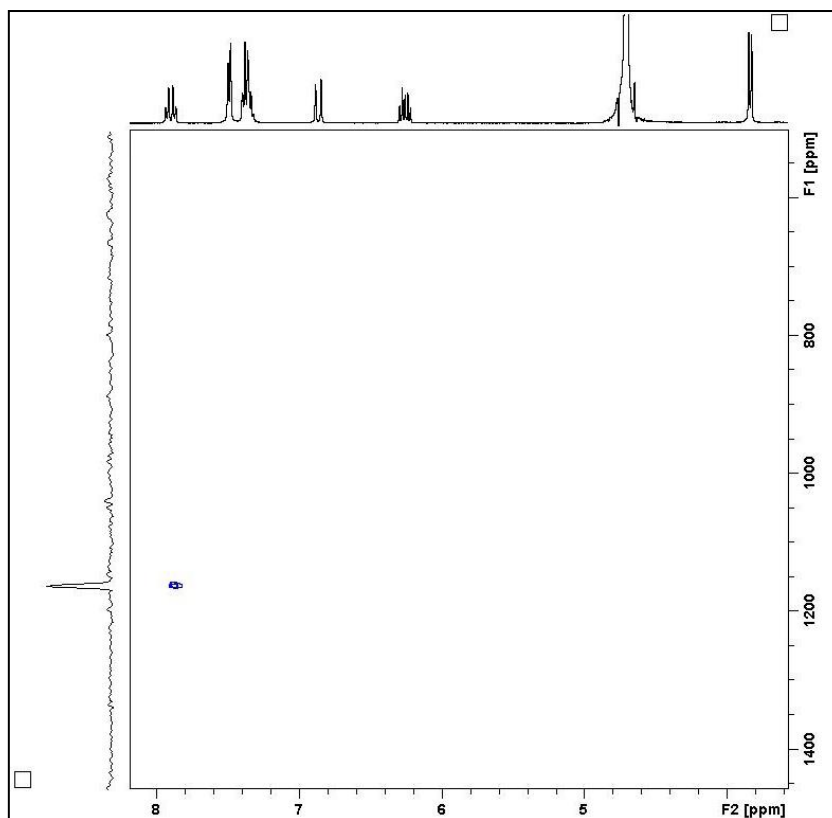

Figure S30.  $^1\text{H}^{77}\text{Se}$  HMBC NMR spectrum of compound 1- $\text{CF}_3$  at the end of the reaction.

Compound 1-H

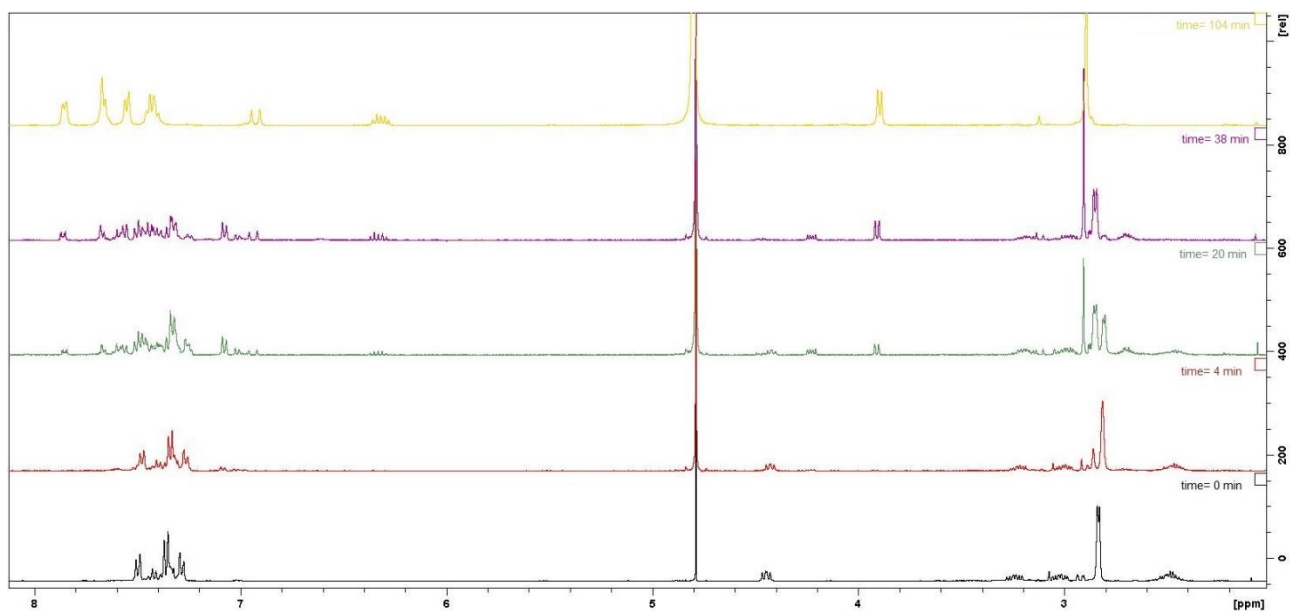

Figure S31. Variation over time of the  $^1\text{H-NMR}$  spectra during the oxidation-reaction of compound 1-H.

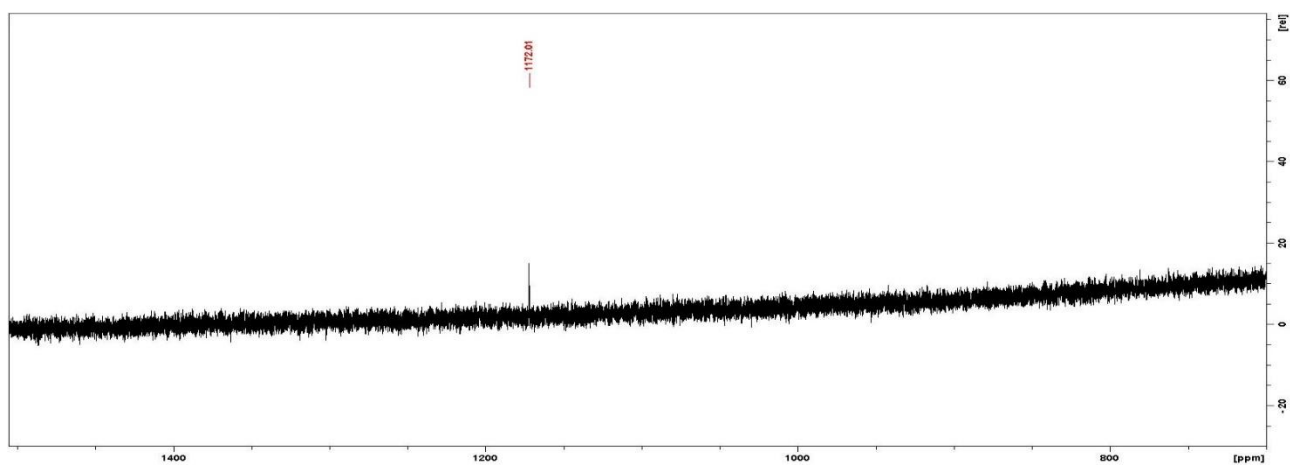

Figure S32.  $^{77}\text{Se-NMR}$  spectrum of compound 1-H at the end of the reaction, showing the presence of seleninic acid 8.

## ESI-MS study of the reaction with H<sub>2</sub>O<sub>2</sub>

### Compound 1-H

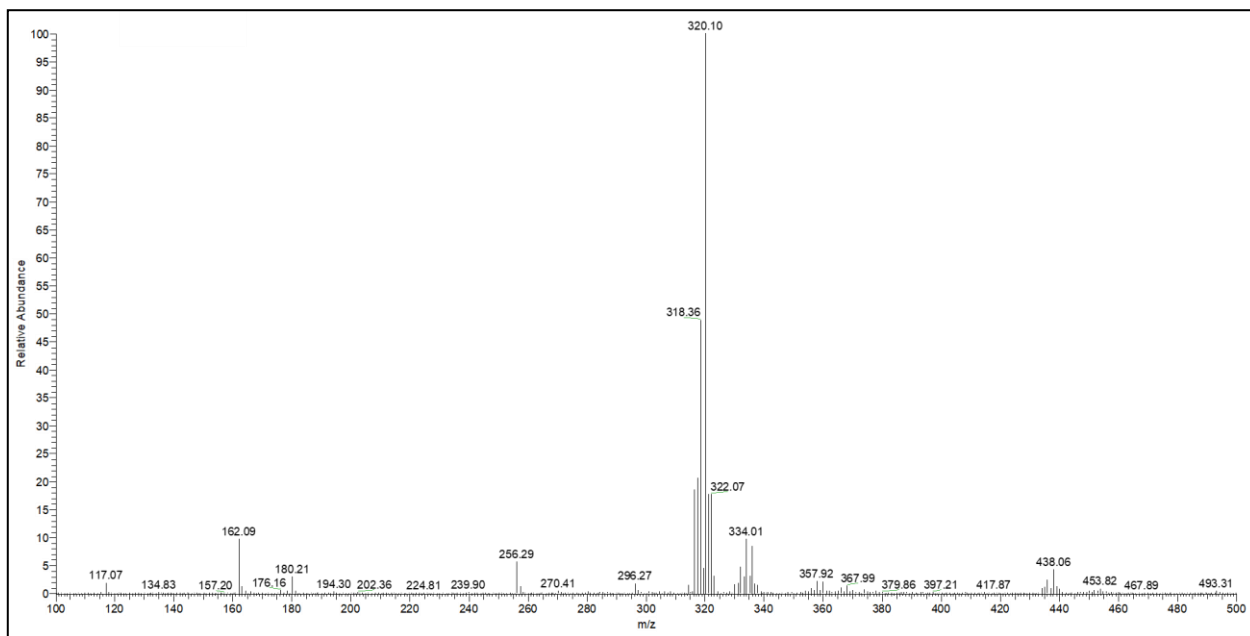

Figure S33. ESI-MS study of the reaction of compound 1-H with H<sub>2</sub>O<sub>2</sub> (positive ionization mode, t = 5 min). The peaks corresponding to the starting material (m/z = 318), the selenoxide (m/z = 334) and the cinnamylamine 6 (m/z = 162) were detected.

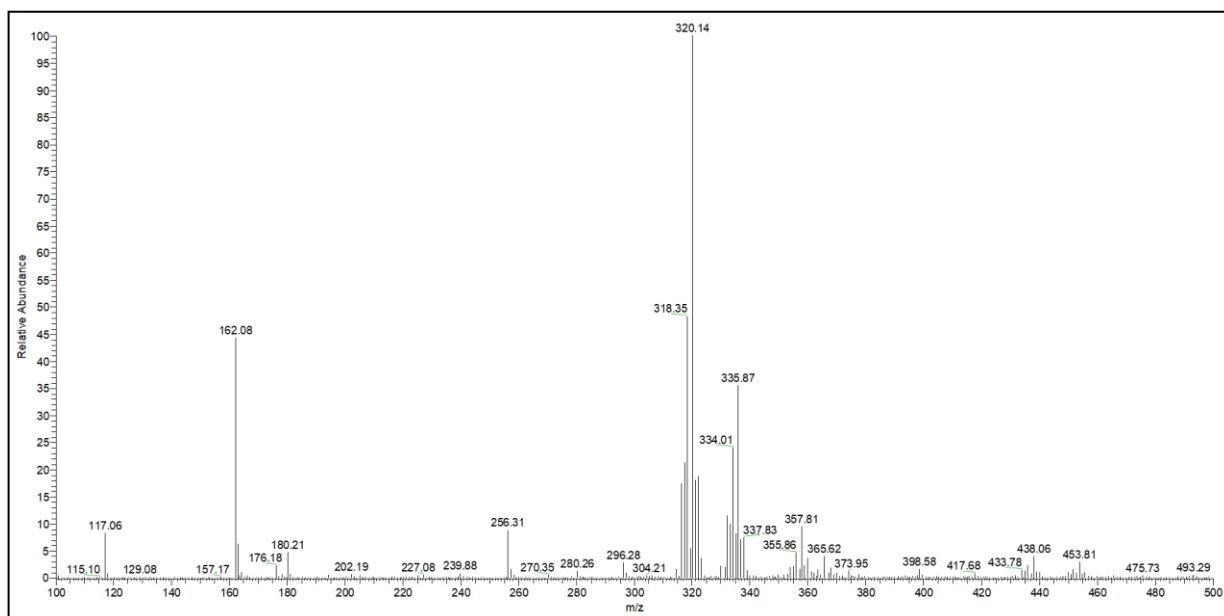

Figure S34. ESI-MS study of the reaction of compound 1-H with H<sub>2</sub>O<sub>2</sub> (positive ionization mode, t = 20 min). The peaks corresponding to the starting material (m/z = 318), the selenoxide and its sodium adduct (m/z = 334 and m/z = 357) and the cinnamylamine 6 (m/z = 162) were detected.

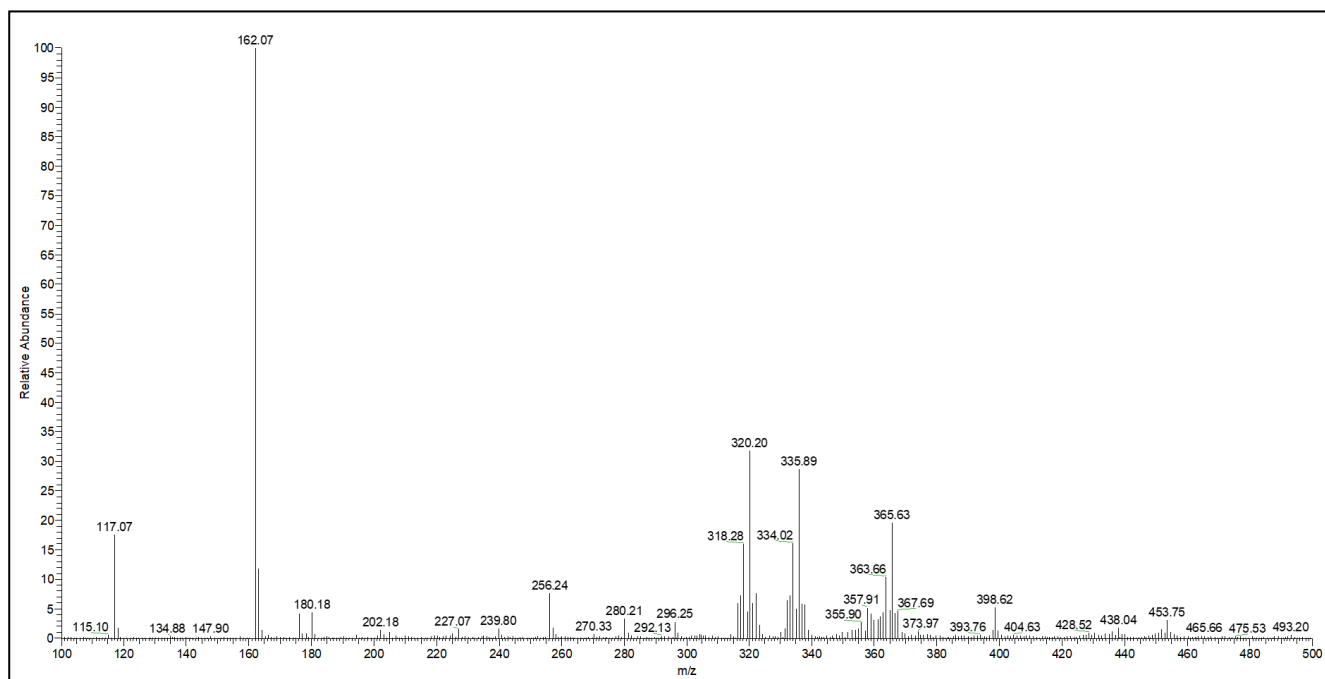

Figure S35. ESI-MS study of the reaction of compound 1-H with H<sub>2</sub>O<sub>2</sub> (positive ionization mode, t = 60 min). The peaks corresponding to the starting material (m/z = 318), the selenoxide and its sodium and methanol adduct (m/z = 334, m/z = 357, m/z = 365), together with the cinnamylamine **6** (m/z = 162) were detected.

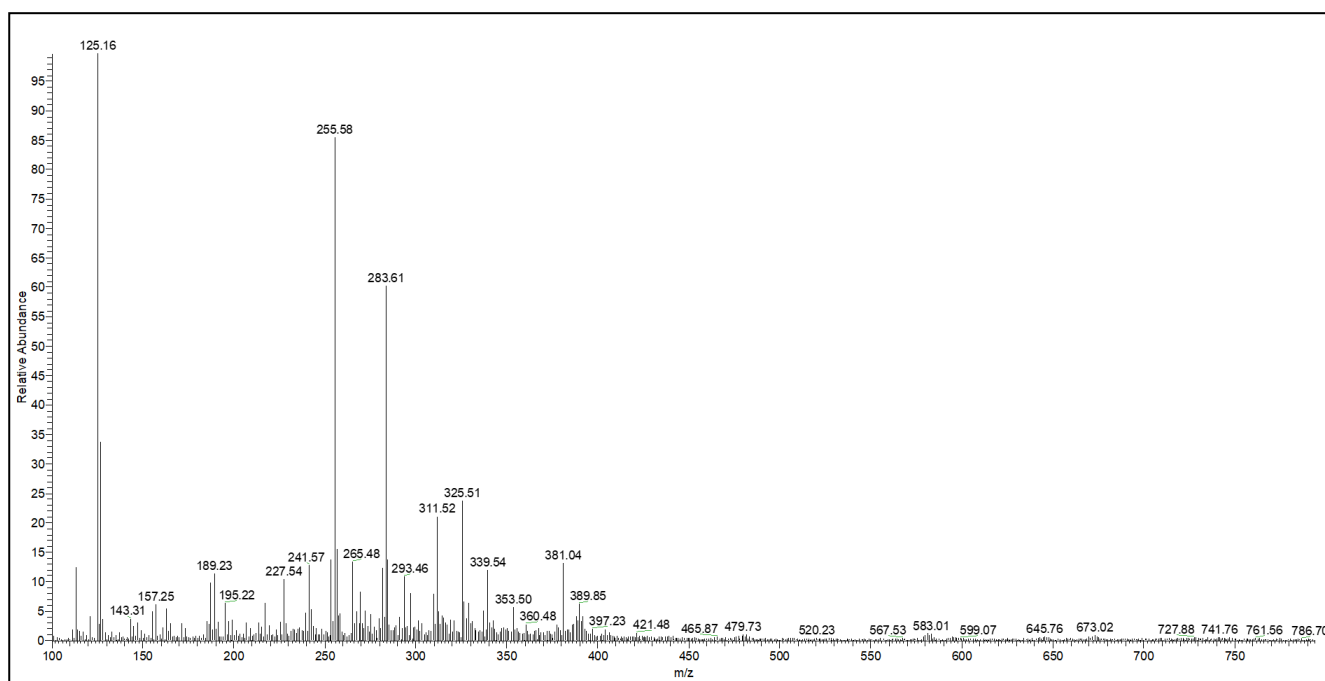

Figure S36. ESI-MS study of the reaction of compound 1-H with H<sub>2</sub>O<sub>2</sub> (negative ionization mode, t = 10 min). The seleninic acid **8** (m/z = 189) is detectable.

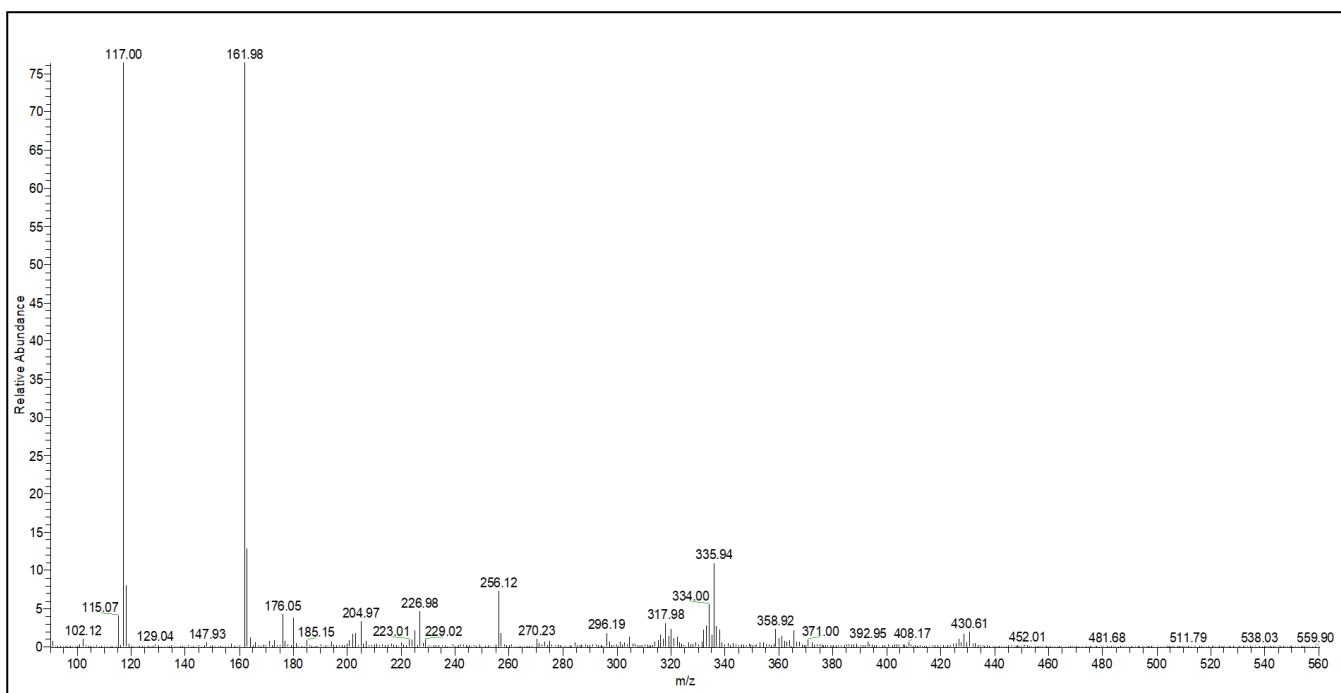

Figure S37. ESI-MS characterization of the NMR sample of compound 1-H used for the NMR study (positive ionization mode, final timepoint). Cinnamylamine 6 ( $m/z = 162$ ), selenoxide ( $m/z = 334$ ) and diphenyl diselenide ( $m/z = 316$ ) are clearly detectable.

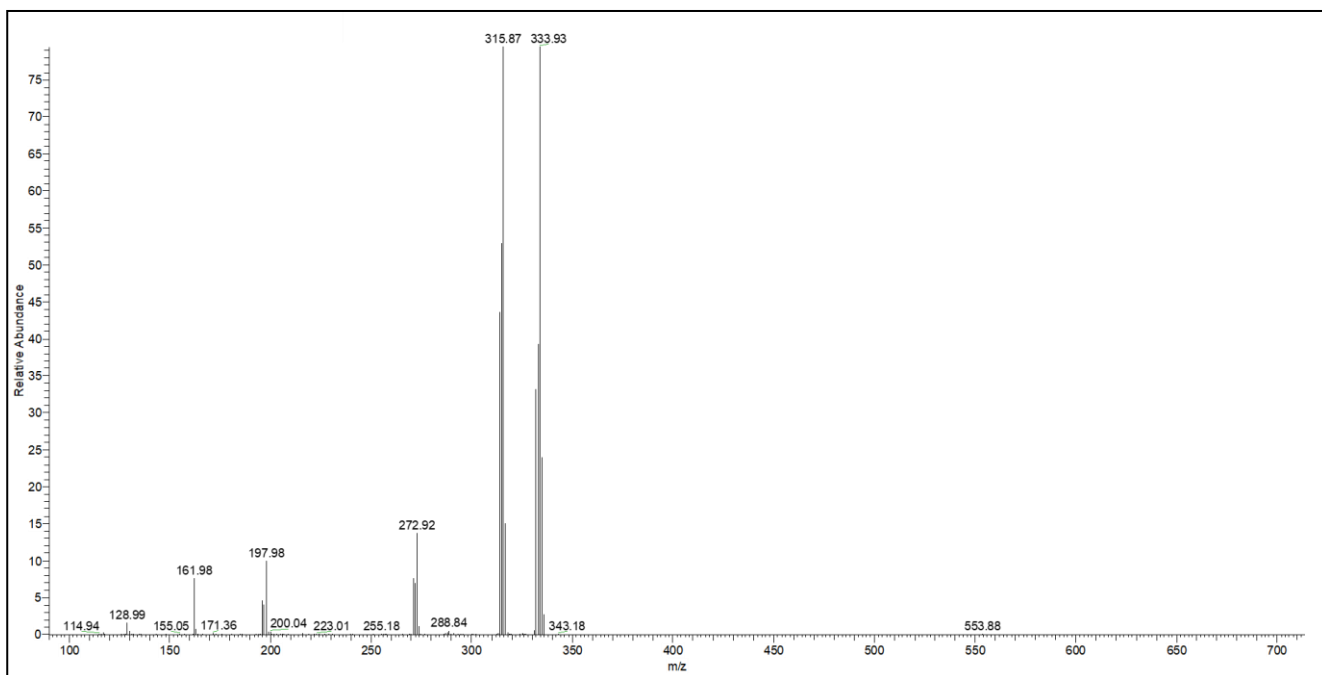

Figure S38. CID experiment showing the fragmentation pattern of the selenoxide (from compound 1-H, positive ionization mode, parent ion  $m/z = 334$ , NCE = 16). The fragmentation promotes the formation of diphenyl diselenide ( $m/z = 315$ ) and of the cinnamylamine 6 ( $m/z = 162$ ).



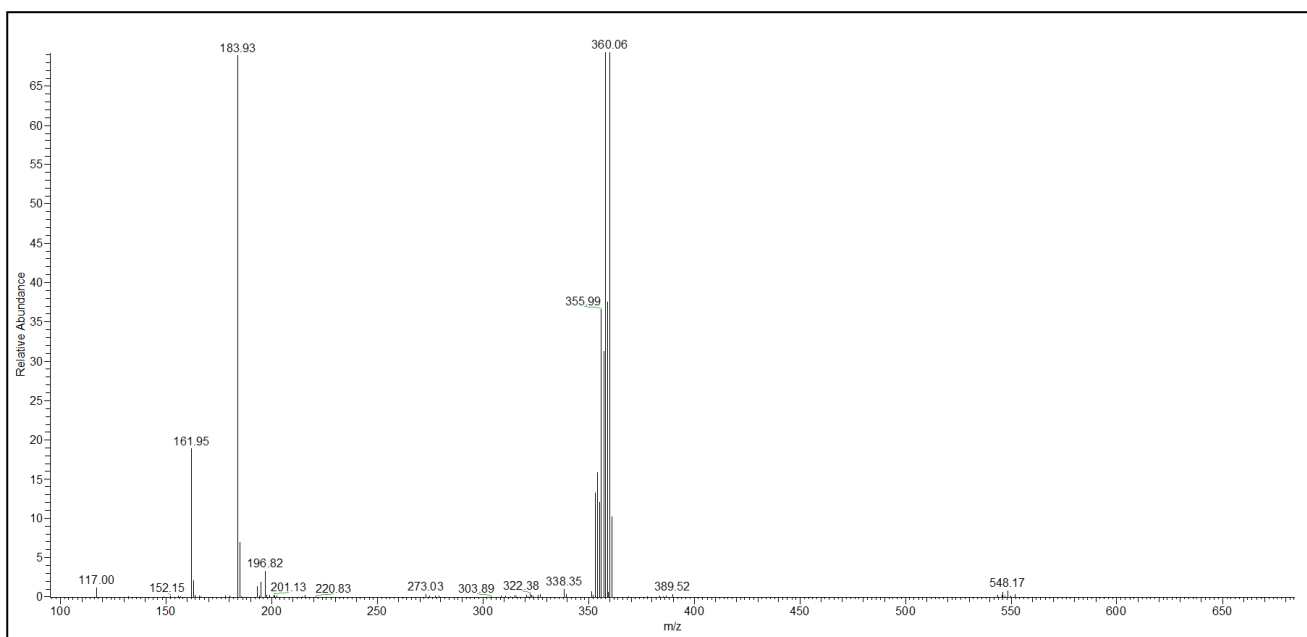

Figure S39. CID experiment showing the fragmentation pattern of the sodium adduct of the selenoxide (from compound 1-H, positive ionization mode, parent ion  $m/z = 357$ , NCE = 16). The fragmentation promotes the formation of the cinnamylamine 6 ( $m/z = 162$ ) and of the cinnamylamine sodium adduct ( $m/z = 184$ ).

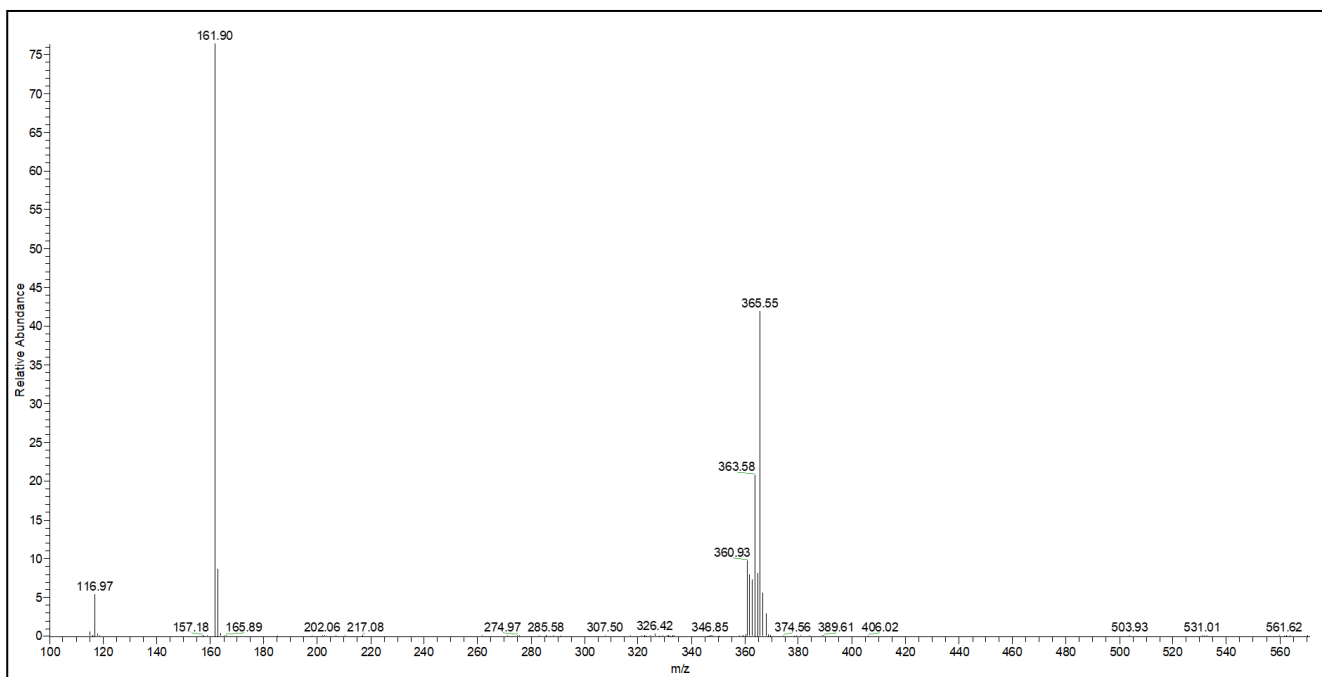

Figure S40. CID experiment showing the fragmentation pattern of the methanol adduct of the selenoxide (from compound 1-H, positive ionization mode, parent ion  $m/z = 365$ , NCE = 12). The fragmentation promotes the formation of the cinnamylamine 6 ( $m/z = 162$ ).

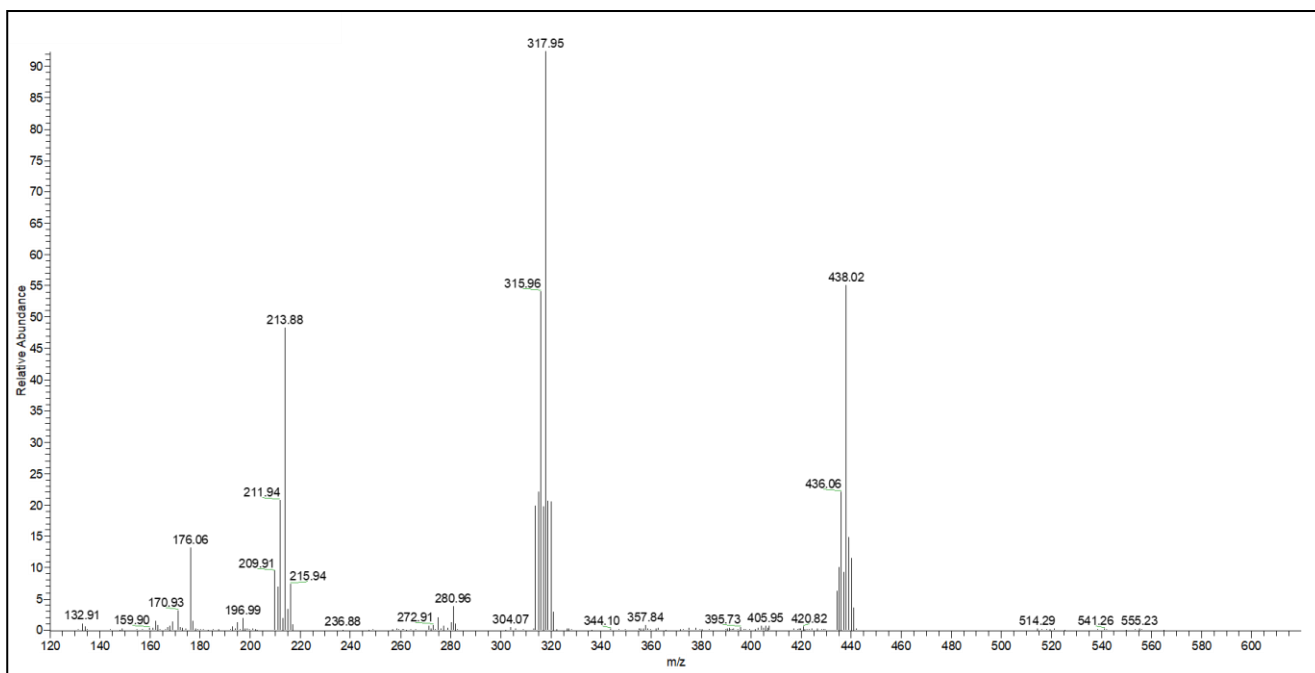

Figure S41. CID experiment showing the fragmentation pattern of the ion with  $m/z = 438$  (from compound 1-H, positive ionization mode, NCE = 24). The fragmentation promotes the formation of two Se-containing species ( $m/z = 316$  and  $m/z = 212$ ).

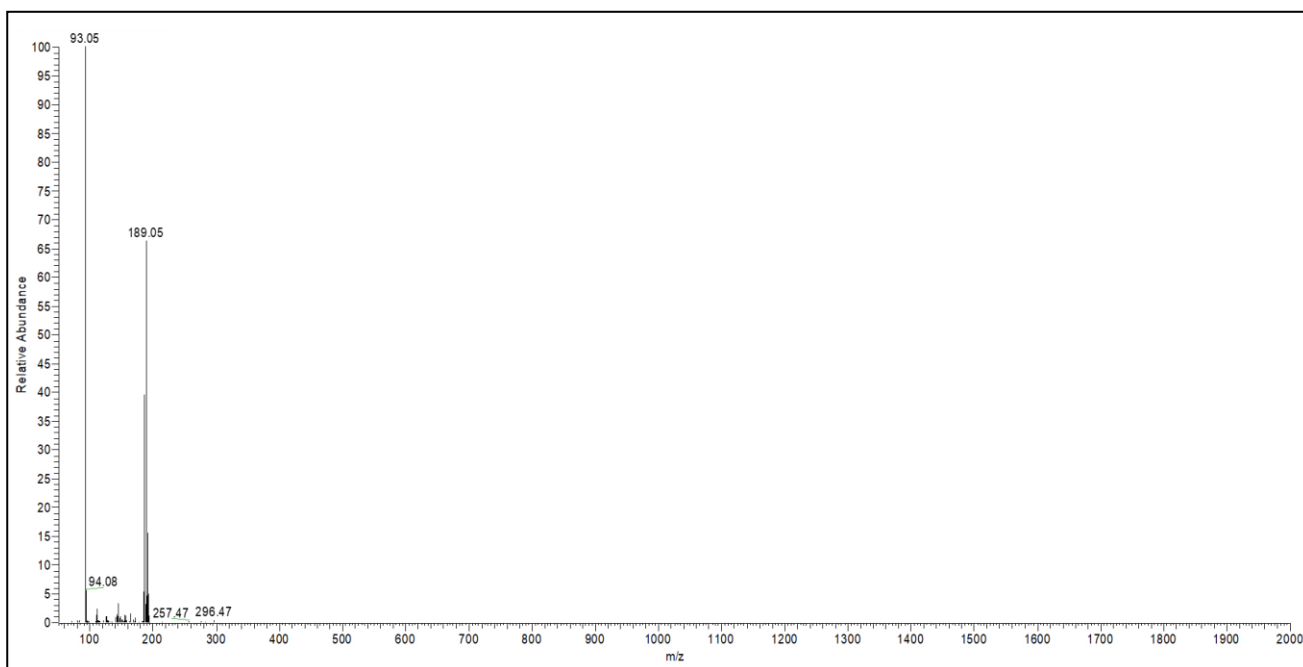

Figure S42. CID experiment showing the fragmentation pattern of the seleninic acid 8 (from compound 1-H, negative ionization mode, parent ion  $m/z = 189$ , NCE = 25). The fragmentation promotes the formation of phenol ( $m/z = 93$ ).

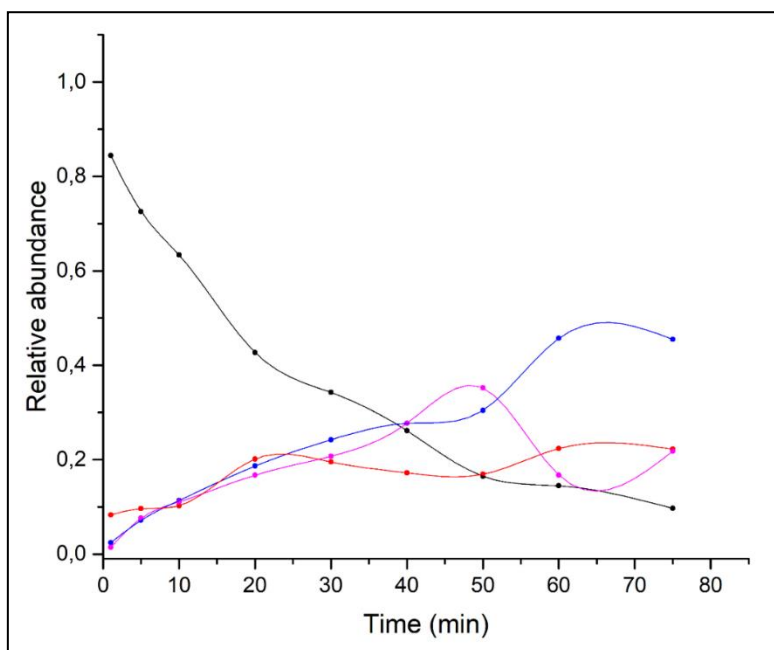

Figure S43. ESI-MS study of the reaction with  $\text{H}_2\text{O}_2$  of compound 1-H. This graph was obtained using the relative intensities of the signals in the  $m/z$  spectra acquired at different time points (• starting material, • selenoxide, • seleninic acid, • cinnamylamine).

Compound 1-CF<sub>3</sub>

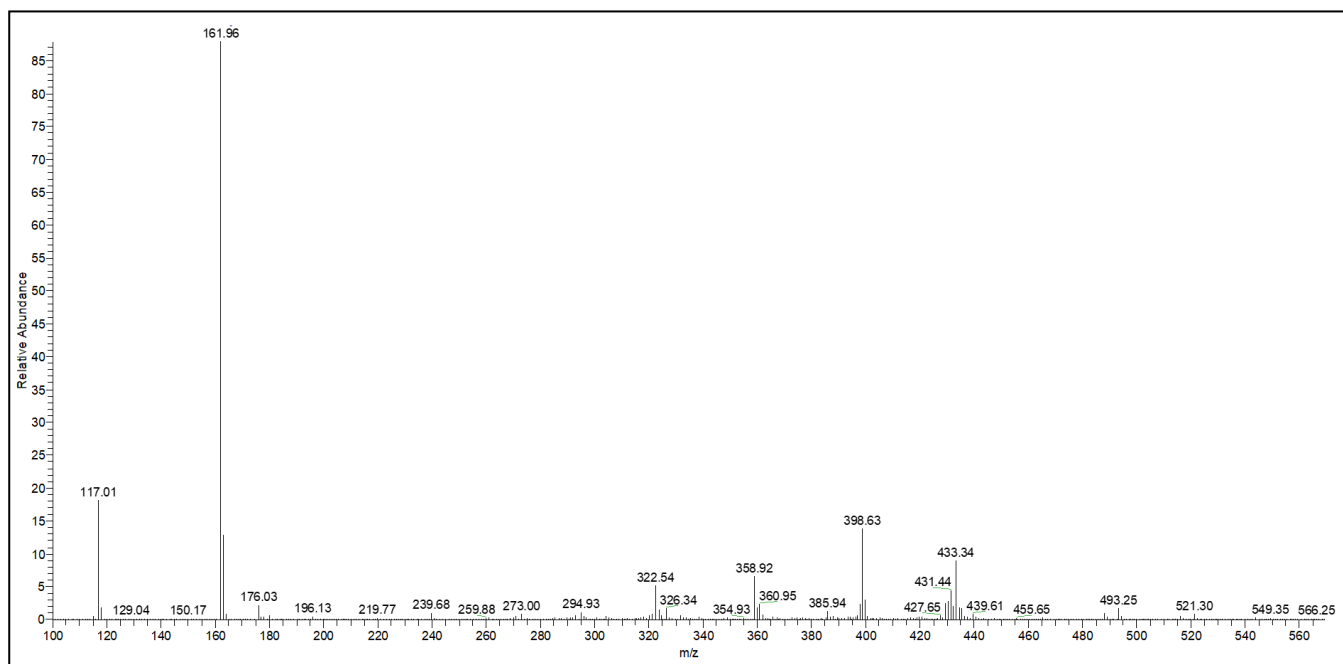

Figure S44. ESI-MS characterization of the NMR sample of compound 1-CF<sub>3</sub> used for the study of the reaction (positive ionization mode, final timepoint). Cinnamylamine 6 ( $m/z = 162$ ) and oxidised selenium species are clearly detectable.

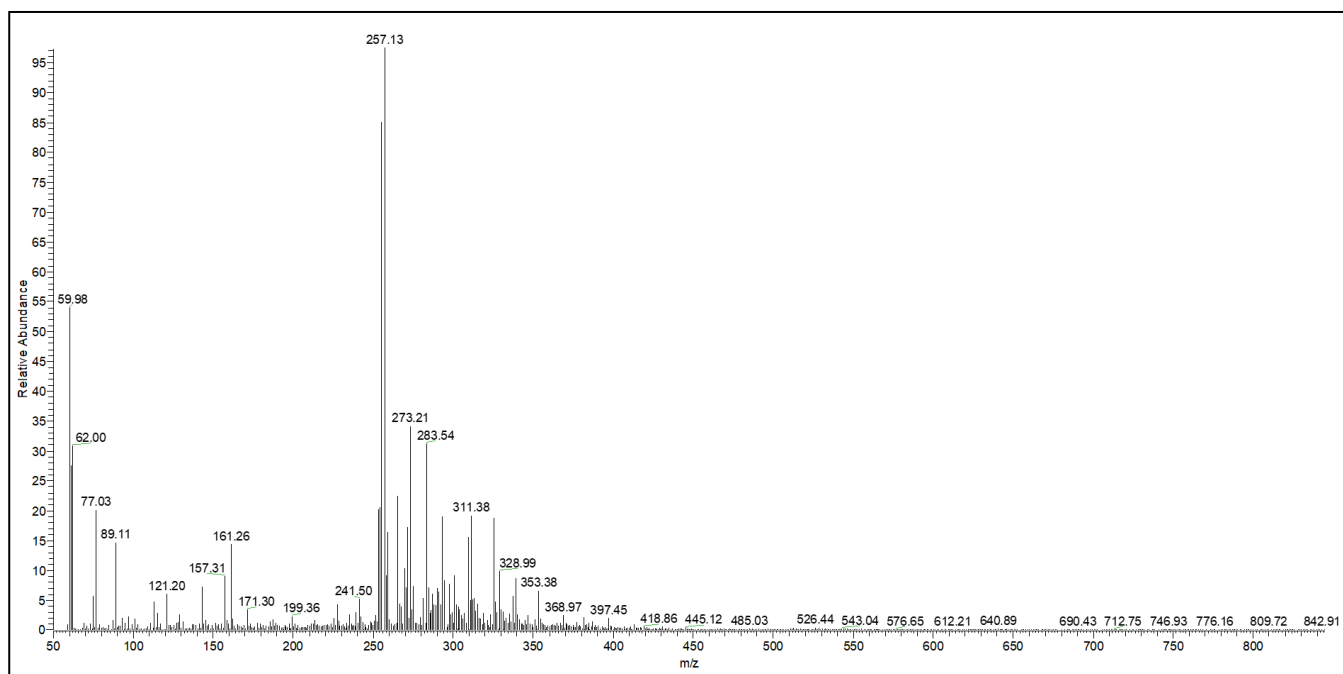

Figure S45. ESI-MS characterization of the NMR sample of compound 1-CF<sub>3</sub> used for the study of the reaction (negative ionization mode, final timepoint). Seleninic acid 7 ( $m/z = 255$ ) was detected.

## Computational methodology

### Tables

Table S1.  $\Delta G^{\circ}_{\text{HAT}}$  (kcal mol<sup>-1</sup>) in the gas phase, in benzene, and in water for the scavenging of HO<sup>•</sup>, HOO<sup>•</sup> and CH<sub>2</sub>=CHOO<sup>•</sup> from non-aromatic sites of selenofluoxetine. Level of theory: (SMD)-M06-2X/6-311+G(d,p)//M06-2X/6-31G(d).

| Site | HO <sup>•</sup> |         |        | HOO <sup>•</sup> |         |       | CH <sub>2</sub> CHOO <sup>•</sup> |         |       |
|------|-----------------|---------|--------|------------------|---------|-------|-----------------------------------|---------|-------|
|      | Gas Phase       | Benzene | Water  | Gas Phase        | Benzene | Water | Gas Phase                         | Benzene | Water |
| C7   | -28.06          | -28.43  | -29.87 | 3.54             | 3.62    | 2.59  | 2.24                              | 2.15    | 0.31  |
| C14  | -18.94          | -19.39  | -21.83 | 12.65            | 12.66   | 10.63 | 11.35                             | 11.18   | 8.34  |
| C15  | -26.81          | -28.04  | -30.93 | 4.79             | 4.00    | 1.53  | 3.49                              | 2.53    | -0.76 |
| N16  | -24.98          | -25.70  | -32.01 | 6.62             | 6.35    | 0.45  | 5.32                              | 4.88    | -1.84 |
| C17  | -25.43          | -26.05  | -28.16 | 6.17             | 5.99    | 4.30  | 4.87                              | 4.52    | 2.02  |

Table S2. Relative electronic energies for the stationary points of the oxidation and elimination reactions of selenofluoxetine derivatives. Level of theory OLYP/TZ2P.

| Selenofluoxetine R=H, R'=CF <sub>3</sub> . E in kcal mol <sup>-1</sup> |            |                                     |            |
|------------------------------------------------------------------------|------------|-------------------------------------|------------|
|                                                                        | $\Delta E$ |                                     | $\Delta E$ |
| 1+H <sub>2</sub> O <sub>2</sub>                                        | 0.0        | 1+H <sub>2</sub> O <sub>2</sub>     | 0.0        |
| <i>R-S</i> -RCox                                                       | -3.1       | <i>R-R</i> -RCox                    | -2.5       |
| <i>R-S</i> -TSox                                                       | 16.5       | <i>R-R</i> -TSox                    | 17.9       |
| <i>R-S</i> -PCox                                                       | -42.1      | <i>R-R</i> -PCox                    | -41.7      |
| <i>R-S</i> -Ox+H <sub>2</sub> O                                        | -37.9      | <i>R-R</i> -Ox+H <sub>2</sub> O     | -36.8      |
| <i>R-S</i> -TSelim+H <sub>2</sub> O                                    | -24.0      | <i>R-R</i> -TSelim+H <sub>2</sub> O | -24.8      |
| <i>R-S</i> -PCelim+H <sub>2</sub> O                                    | -49.1      | <i>R-R</i> -PCelim+H <sub>2</sub> O | -49.1      |
| 6'+7+H <sub>2</sub> O                                                  | -47.5      | 6'+7+H <sub>2</sub> O               | -47.5      |

| <b>1-CF<sub>3</sub></b> R=CH <sub>3</sub> , R'=CF <sub>3</sub> . E in kcal mol <sup>-1</sup> |            |                                                  |            |
|----------------------------------------------------------------------------------------------|------------|--------------------------------------------------|------------|
|                                                                                              | $\Delta E$ |                                                  | $\Delta E$ |
| 1-CF <sub>3</sub> +H <sub>2</sub> O <sub>2</sub>                                             | 0.0        | 1-CF <sub>3</sub> +H <sub>2</sub> O <sub>2</sub> | 0.0        |
| <i>R-S</i> -RCox                                                                             | -3.0       | <i>R-R</i> -RCox                                 | -2.5       |
| <i>R-S</i> -TSox                                                                             | 16.6       | <i>R-R</i> -TSox                                 | 18.0       |
| <i>R-S</i> -PCox                                                                             | -42.5      | <i>R-R</i> -PCox                                 | -41.7      |
| <i>R-S</i> -Ox+H <sub>2</sub> O                                                              | -37.9      | <i>R-R</i> -Ox+H <sub>2</sub> O                  | -36.8      |
| <i>R-S</i> -TSelim+H <sub>2</sub> O                                                          | -21.7      | <i>R-R</i> -TSelim+H <sub>2</sub> O              | -22.9      |
| <i>R-S</i> -PCelim+H <sub>2</sub> O                                                          | -49.3      | <i>R-R</i> -PCelim+H <sub>2</sub> O              | -49.2      |
| 6+7+H <sub>2</sub> O                                                                         | -47.5      | 6+7+H <sub>2</sub> O                             | -47.5      |

| <b>1-H</b> R=CH <sub>3</sub> , R'=H, E in kcal mol <sup>-1</sup> |            |                                           |            |
|------------------------------------------------------------------|------------|-------------------------------------------|------------|
|                                                                  | $\Delta E$ |                                           | $\Delta E$ |
| <b>1-H</b> +H <sub>2</sub> O <sub>2</sub>                        | 0.0        | <b>1-H</b> +H <sub>2</sub> O <sub>2</sub> | 0.0        |
| <i>R-S</i> -RCox                                                 | -3.3       | <i>R-R</i> -RCox                          | -2.9       |
| <i>R-S</i> -TSox                                                 | 15.5       | <i>R-R</i> -TSox                          | 16.9       |
| <i>R-S</i> -PCox                                                 | -43.2      | <i>R-R</i> -PCox                          | -42.4      |
| <i>R-S</i> -Ox+H <sub>2</sub> O                                  | -38.4      | <i>R-R</i> -Ox+H <sub>2</sub> O           | -37.3      |
| <i>R-S</i> -TSelim                                               | -21.6      | <i>R-R</i> -TSelim+H <sub>2</sub> O       | -22.7      |
| <i>R-S</i> -PCelim                                               | -48.7      | <i>R-R</i> -PCelim+H <sub>2</sub> O       | -48.7      |
| 6+8+H <sub>2</sub> O                                             | -46.7      | 6+8+H <sub>2</sub> O                      | -46.7      |

**Selenofluoxetine (SeFl)**

**Bond Energy -3411.95597389 a.u.**

|    |           |           |           |
|----|-----------|-----------|-----------|
| F  | 5.644535  | -0.339833 | 0.350695  |
| C  | 4.641628  | 0.495918  | 0.663447  |
| F  | 4.706992  | 0.696996  | 1.988637  |
| F  | 4.899817  | 1.665248  | 0.062315  |
| C  | 3.309201  | -0.065587 | 0.257197  |
| C  | 2.689841  | 0.365489  | -0.911030 |
| C  | 1.476818  | -0.199621 | -1.294158 |
| C  | 0.889669  | -1.190869 | -0.509472 |
| C  | 1.519735  | -1.619602 | 0.660594  |
| C  | 2.728906  | -1.056032 | 1.047521  |
| H  | 3.221507  | -1.377863 | 1.959767  |
| H  | 1.052837  | -2.393850 | 1.261120  |
| Se | -0.784094 | -1.959611 | -1.016901 |
| C  | -1.903474 | -0.731292 | 0.037223  |
| C  | -1.807855 | 0.693161  | -0.451880 |
| C  | -1.882161 | 1.006433  | -1.812424 |
| C  | -1.871294 | 2.331927  | -2.233145 |
| C  | -1.776242 | 3.362903  | -1.299450 |
| C  | -1.695058 | 3.058528  | 0.056219  |
| C  | -1.712285 | 1.730550  | 0.477845  |
| H  | -1.672904 | 1.486581  | 1.536284  |
| H  | -1.615287 | 3.855689  | 0.789297  |
| H  | -1.760603 | 4.397177  | -1.629091 |
| H  | -1.929028 | 2.561627  | -3.292989 |
| H  | -1.912812 | 0.194879  | -2.535133 |
| C  | -3.340316 | -1.269498 | -0.021128 |
| C  | -4.306889 | -0.400765 | 0.779965  |
| N  | -3.854971 | -0.250659 | 2.156251  |
| H  | -3.869327 | -1.162759 | 2.609738  |
| C  | -4.684095 | 0.677626  | 2.909244  |
| H  | -4.354290 | 0.704793  | 3.950836  |
| H  | -5.768    | 0.435458  | 2.888500  |
| H  | -4.558208 | 1.681226  | 2.489288  |
| H  | -5.326825 | -0.818561 | 0.706017  |
| H  | -4.342047 | 0.601402  | 0.335992  |
| H  | -3.678526 | -1.314493 | -1.063969 |
| H  | -3.348010 | -2.298578 | 0.361799  |
| H  | -1.546105 | -0.787932 | 1.067076  |
| H  | 0.975895  | 0.136323  | -2.195977 |
| H  | 3.148878  | 1.142961  | -1.511920 |

**Bond Energy -3487.65670998 a.u.**

|    |           |           |           |
|----|-----------|-----------|-----------|
| F  | 4.752916  | 1.732002  | 0.234942  |
| C  | 4.715807  | 0.455017  | 0.648866  |
| F  | 5.728765  | -0.179995 | 0.039764  |
| F  | 4.976181  | 0.465595  | 1.964452  |
| C  | 3.393661  | -0.188195 | 0.347735  |
| C  | 3.203177  | -0.837519 | -0.867772 |
| C  | 1.956674  | -1.373396 | -1.171519 |
| C  | 0.913658  | -1.280194 | -0.250857 |
| C  | 1.109723  | -0.637241 | 0.973573  |
| C  | 2.349748  | -0.081625 | 1.264094  |
| H  | 2.512282  | 0.421170  | 2.211816  |
| H  | 0.299780  | -0.565678 | 1.694866  |
| Se | -0.766587 | -2.065274 | -0.689310 |
| C  | -1.914264 | -0.603863 | -0.131935 |
| C  | -1.468374 | 0.739354  | -0.642138 |
| C  | -1.103276 | 0.905198  | -1.982537 |
| C  | -0.772916 | 2.164099  | -2.469348 |
| C  | -0.790546 | 3.270464  | -1.620969 |
| C  | -1.133130 | 3.107545  | -0.282329 |
| C  | -1.469047 | 1.847203  | 0.208182  |
| H  | -1.715459 | 1.701239  | 1.256236  |
| H  | -1.129935 | 3.961681  | 0.388092  |
| H  | -0.524467 | 4.251933  | -2.974    |
| H  | -0.490141 | 2.281417  | -3.511085 |
| H  | -1.049345 | 0.027669  | -2.621938 |
| C  | -3.354248 | -0.966270 | -0.518990 |
| C  | -4.403401 | 0.035337  | -0.039408 |
| N  | -4.583495 | -0.003305 | 1.413558  |
| H  | -4.957259 | -0.917745 | 1.666178  |
| C  | -5.503074 | 1.032332  | 1.876776  |
| H  | -5.673436 | 0.919024  | 2.949677  |
| H  | -6.474312 | 1.012049  | 1.359227  |
| H  | -5.046475 | 2.011444  | 1.705094  |
| H  | -5.353082 | -0.156135 | -0.565582 |
| H  | -4.089728 | 1.050455  | -0.308032 |
| H  | -3.411743 | -1.026448 | -1.613444 |
| H  | -3.591592 | -1.967424 | -0.134060 |
| H  | -1.837817 | -0.627070 | 1.043418  |
| H  | 1.789286  | -1.859542 | -2.127585 |
| H  | 4.021897  | -0.915841 | -1.575405 |
| O  | -1.963940 | -0.366440 | 2.402506  |
| H  | -2.920284 | -0.116114 | 2.304107  |

**SeFl-TS-C7**

**SeFl-C7-rad****Bond Energy -3411.31263177 a.u.**

|    |           |           |           |
|----|-----------|-----------|-----------|
| F  | 5.349629  | -0.231673 | -0.329421 |
| C  | 4.391095  | 0.102940  | 0.547301  |
| F  | 4.625159  | -0.573776 | 1.681996  |
| F  | 4.559075  | 1.404578  | 0.831738  |
| C  | 3.018407  | -0.175797 | 0.008940  |
| C  | 2.798972  | -0.192434 | -1.364702 |
| C  | 1.510872  | -0.387895 | -1.850853 |
| C  | 0.453935  | -0.587614 | -0.962984 |
| C  | 0.674889  | -0.580031 | 0.414853  |
| C  | 1.960285  | -0.365023 | 0.896144  |
| H  | 2.148014  | -0.360607 | 1.965270  |
| H  | -0.154757 | -0.770960 | 1.089597  |
| Se | -1.285412 | -0.896906 | -1.696341 |
| C  | -2.406393 | -0.040955 | -0.447126 |
| C  | -2.186418 | 1.315076  | -0.043830 |
| C  | -1.285464 | 2.165636  | -0.729123 |
| C  | -1.093520 | 3.475463  | -0.325332 |
| C  | -1.785661 | 3.989293  | 0.772928  |
| C  | -2.684096 | 3.171560  | 1.458658  |
| C  | -2.886585 | 1.859638  | 1.060104  |
| H  | -3.581525 | 1.238102  | 1.616026  |
| H  | -3.229319 | 3.560879  | 2.313151  |
| H  | -1.629333 | 5.015897  | 1.087768  |
| H  | -0.402295 | 4.106668  | -0.875237 |
| H  | -0.766564 | 1.778322  | -1.599340 |
| C  | -3.547403 | -0.882605 | 0.043934  |
| C  | -3.223424 | -1.695795 | 1.310366  |
| N  | -1.947491 | -2.381604 | 1.198396  |
| H  | -1.837213 | -2.777614 | 0.266741  |
| C  | -1.768110 | -3.397732 | 2.219388  |
| H  | -0.805455 | -3.895242 | 2.077871  |
| H  | -2.562716 | -4.162923 | 2.230570  |
| H  | -1.757106 | -2.918563 | 3.204290  |
| H  | -4.063957 | -2.388773 | 1.499818  |
| H  | -3.166264 | -1.022863 | 2.176647  |
| H  | -4.427120 | -0.259669 | 0.241225  |
| H  | -3.833437 | -1.585879 | -0.748570 |
| H  | 1.324530  | -0.379221 | -2.920776 |
| H  | 3.627909  | -0.046041 | -2.049050 |

**SeFl-TS-C14****Bond Energy -3487.65162647 a.u**

|   |          |           |          |
|---|----------|-----------|----------|
| F | 4.900509 | -0.478954 | 2.029184 |
| C | 4.777593 | 0.068959  | 0.811697 |

|    |           |           |           |
|----|-----------|-----------|-----------|
| F  | 5.025325  | 1.380856  | 0.928050  |
| F  | 5.753023  | -0.449403 | 0.049811  |
| C  | 3.420457  | -0.192399 | 0.221595  |
| C  | 2.849482  | 0.738537  | -0.640990 |
| C  | 1.617582  | 0.466807  | -1.227455 |
| C  | 0.964238  | -0.732388 | -0.946666 |
| C  | 1.539804  | -1.659999 | -0.077921 |
| C  | 2.771303  | -1.390934 | 0.507602  |
| H  | 3.224922  | -2.102598 | 1.189635  |
| H  | 1.021028  | -2.588530 | 0.138600  |
| Se | -0.739457 | -1.097269 | -1.727183 |
| C  | -1.780106 | -0.313162 | -0.255573 |
| C  | -1.725157 | 1.197063  | -0.229345 |
| C  | -1.759841 | 1.962715  | -1.397569 |
| C  | -1.784093 | 3.351969  | -1.328164 |
| C  | -1.764147 | 3.992205  | -0.090664 |
| C  | -1.725646 | 3.234911  | 1.077098  |
| C  | -1.707599 | 1.843990  | 1.009193  |
| H  | -1.720    | 1.242656  | 1.915452  |
| H  | -1.706538 | 3.727040  | 2.044762  |
| H  | -1.775527 | 5.076447  | -0.037901 |
| H  | -1.811215 | 3.936329  | -2.242943 |
| H  | -1.743202 | 1.457406  | -2.359382 |
| C  | -3.214866 | -0.817819 | -0.371658 |
| C  | -4.076768 | -0.504190 | 0.837409  |
| N  | -3.418688 | -0.962387 | 2.049568  |
| H  | -3.196041 | -1.951286 | 1.932550  |
| C  | -4.239748 | -0.761733 | 3.231590  |
| H  | -3.731483 | -1.175316 | 4.105922  |
| H  | -5.241445 | -1.217903 | 3.160701  |
| H  | -4.373460 | 0.312892  | 3.397061  |
| H  | -5.076458 | -0.950890 | 0.691076  |
| H  | -4.220981 | 0.583770  | 0.911168  |
| H  | -3.688955 | -0.538868 | -1.319108 |
| H  | -3.150287 | -2.023150 | -0.377602 |
| H  | -1.352571 | -0.713123 | 0.665891  |
| H  | 1.155058  | 1.187739  | -1.893450 |
| H  | 3.361548  | 1.672904  | -0.844795 |
| O  | -2.650640 | -3.223117 | -0.007950 |
| H  | -1.801548 | -3.086377 | -0.481276 |

**SeFl-C14-rad****Bond Energy -3411.28738748 a.u.**

|   |          |           |           |
|---|----------|-----------|-----------|
| F | 4.931932 | 0.605814  | 1.884710  |
| C | 4.677284 | 0.637372  | 0.568178  |
| F | 4.732585 | 1.917655  | 0.174216  |
| F | 5.688251 | -0.003038 | -0.039679 |
| C | 3.351203 | 0.010883  | 0.243497  |
| C | 2.881707 | -1.043731 | 1.022390  |



|    |           |           |           |
|----|-----------|-----------|-----------|
| C  | 1.679278  | -1.657391 | 0.690040  |
| C  | 0.951198  | -1.219217 | -0.416850 |
| C  | 1.428954  | -0.162466 | -1.192592 |
| C  | 2.638     | 0.455798  | -0.860941 |
| H  | 3.003013  | 1.285581  | -1.452034 |
| H  | 0.850997  | 0.181215  | -2.044304 |
| Se | -0.710646 | -2.057452 | -0.846804 |
| C  | -1.835316 | -0.829374 | 0.216321  |
| C  | -1.849661 | 0.565584  | -0.369344 |
| C  | -2.091239 | 0.763532  | -1.732265 |
| C  | -2.173273 | 2.049637  | -2.253585 |
| C  | -2.005844 | 3.154853  | -1.419365 |
| C  | -1.760898 | 2.963657  | -0.063092 |
| C  | -1.686057 | 1.673685  | 0.460341  |
| H  | -1.523690 | 1.520539  | 1.523209  |
| H  | -1.626430 | 3.819161  | 0.591937  |
| H  | -2.063299 | 4.159275  | -1.827448 |
| H  | -2.362214 | 2.191301  | -3.313515 |
| H  | -2.184821 | -0.105945 | -2.377736 |
| C  | -3.204884 | -1.427821 | 0.286578  |
| C  | -4.339495 | -0.556718 | 0.716089  |
| N  | -4.057090 | 0.031327  | 2.030189  |
| H  | -4.071469 | -0.710069 | 2.727749  |
| C  | -5.019778 | 1.061848  | 2.389072  |
| H  | -4.820380 | 1.411015  | 3.405370  |
| H  | -6.071812 | 0.735226  | 2.331585  |
| H  | -4.891787 | 1.911279  | 1.709700  |
| H  | -5.291514 | -1.112209 | 0.688171  |
| H  | -4.439380 | 0.284979  | 0.016162  |
| H  | -3.290075 | -2.509225 | 0.336434  |
| H  | -1.375010 | -0.799019 | 1.213188  |
| H  | 1.294939  | -2.478710 | 1.286476  |
| H  | 3.450506  | -1.374987 | 1.885028  |

### SeFl-TS-C15

#### Bond Energy -3487.64796514 a.u.

|   |          |           |           |
|---|----------|-----------|-----------|
| F | 5.714921 | 0.548249  | -0.338851 |
| C | 4.800803 | 0.651789  | 0.637984  |
| F | 5.342842 | 0.143115  | 1.752242  |
| F | 4.608032 | 1.963641  | 0.845579  |
| C | 3.519028 | -0.036339 | 0.263843  |
| C | 2.837676 | 0.407510  | -0.868458 |
| C | 1.652028 | -0.210406 | -1.244083 |
| C | 1.146053 | -1.267172 | -0.483119 |
| C | 1.834397 | -1.705736 | 0.646468  |
| C | 3.025059 | -1.090327 | 1.023773  |
| H | 3.566438 | -1.426684 | 1.900952  |
| H | 1.433376 | -2.531466 | 1.225633  |

|    |           |           |           |
|----|-----------|-----------|-----------|
| Se | -0.498438 | -2.106319 | -0.973739 |
| C  | -1.654833 | -0.911034 | 0.084052  |
| C  | -1.575033 | 0.510263  | -0.408363 |
| C  | -1.789133 | 0.819221  | -1.755555 |
| C  | -1.792990 | 2.141028  | -2.183966 |
| C  | -1.561502 | 3.173418  | -1.273992 |
| C  | -1.323628 | 2.872705  | 0.065046  |
| C  | -1.335182 | 1.545667  | 0.496398  |
| H  | -1.186314 | 1.308772  | 1.545756  |
| H  | -1.135968 | 3.669766  | 0.777826  |
| H  | -1.562819 | 4.205751  | -1.609196 |
| H  | -1.976961 | 2.369239  | -3.229073 |
| H  | -1.930407 | 0.008338  | -2.465599 |
| C  | -3.075076 | -1.490317 | 0.013507  |
| C  | -4.089983 | -0.661588 | 0.781549  |
| N  | -3.652608 | -0.314568 | 2.099356  |
| H  | -3.311394 | -1.136141 | 2.595813  |
| C  | -4.666862 | 0.390483  | 2.868554  |
| H  | -4.265037 | 0.663304  | 3.847064  |
| H  | -5.590813 | -0.192491 | 3.012658  |
| H  | -4.924412 | 1.302025  | 2.322424  |
| H  | -5.096598 | -1.114920 | 0.736394  |
| H  | -4.282395 | 0.359032  | 0.204917  |
| H  | -3.398430 | -1.563871 | -1.031749 |
| H  | -3.052659 | -2.516348 | 0.408502  |
| H  | -1.289384 | -0.960937 | 1.112042  |
| H  | 1.107161  | 0.128930  | -2.118904 |
| H  | 3.236744  | 1.233240  | -1.449924 |
| O  | -4.602668 | 1.656744  | -0.197561 |
| H  | -3.700727 | 2.027285  | -0.105978 |

### SeFl-C15-rad

#### Bond Energy -3411.29886394 a.u.

|    |           |           |           |
|----|-----------|-----------|-----------|
| F  | 5.709460  | -0.314265 | 0.276133  |
| C  | 4.704275  | 0.511508  | 0.605860  |
| F  | 4.875286  | 0.867159  | 1.887758  |
| F  | 4.860242  | 1.622711  | -0.131965 |
| C  | 3.366616  | -0.127311 | 0.376365  |
| C  | 3.193387  | -0.982948 | -0.708205 |
| C  | 1.941389  | -1.527055 | -0.963692 |
| C  | 0.862620  | -1.240602 | -0.123219 |
| C  | 1.047545  | -0.389329 | 0.967432  |
| C  | 2.293863  | 0.174894  | 1.210091  |
| H  | 2.437707  | 0.838455  | 2.056254  |
| H  | 0.219202  | -0.158916 | 1.629541  |
| Se | -0.811347 | -2.059937 | -0.501867 |
| C  | -2.041545 | -0.646718 | 0.089626  |
| C  | -1.711896 | 0.713272  | -0.474883 |
| C  | -1.219132 | 0.880480  | -1.770690 |

|   |           |           |           |
|---|-----------|-----------|-----------|
| C | -1.006388 | 2.155675  | -2.283779 |
| C | -1.274693 | 3.279796  | -1.505670 |
| C | -1.760198 | 3.121227  | -0.210547 |
| C | -1.977688 | 1.844519  | 0.300967  |
| H | -2.372066 | 1.714674  | 1.306879  |
| H | -1.967294 | 3.991954  | 0.404391  |
| H | -1.099492 | 4.273958  | -1.905023 |
| H | -0.619853 | 2.271771  | -3.291725 |
| H | -0.981956 | -0.002528 | -2.357798 |
| C | -3.463164 | -1.116425 | -0.322057 |
| C | -4.532865 | -0.212700 | 0.193502  |
| N | -4.665888 | -0.120068 | 1.577090  |
| H | -4.621585 | -1.021371 | 2.044047  |
| C | -5.717855 | 0.737444  | 2.093098  |
| H | -5.659433 | 0.774419  | 3.182946  |
| H | -6.724863 | 0.410885  | 1.798570  |
| H | -5.561062 | 1.750199  | 1.709858  |
| H | -4.732190 | 0.715063  | -0.336122 |
| H | -3.514775 | -1.171237 | -1.414609 |
| H | -3.607323 | -2.139264 | 0.058983  |
| H | -2.007794 | -0.614407 | 1.182043  |
| H | 1.795345  | -2.175226 | -1.822503 |
| H | 4.033927  | -1.214926 | -1.354426 |

### SeFl-TS-N16

#### Bond Energy -3487.65104459 a.u.

|    |           |           |           |
|----|-----------|-----------|-----------|
| F  | 5.560473  | 0.810196  | 0.246850  |
| C  | 4.802804  | -0.049625 | 0.941912  |
| F  | 5.526731  | -1.161447 | 1.140058  |
| F  | 4.594702  | 0.497271  | 2.150256  |
| C  | 3.508495  | -0.350496 | 0.241695  |
| C  | 2.978832  | 0.559336  | -0.667984 |
| C  | 1.755985  | 0.290829  | -1.275417 |
| C  | 1.066015  | -0.881054 | -0.966866 |
| C  | 1.605635  | -1.789740 | -0.054765 |
| C  | 2.827971  | -1.526017 | 0.551501  |
| H  | 3.258712  | -2.231326 | 1.255037  |
| H  | 1.062260  | -2.702110 | 0.169660  |
| Se | -0.623124 | -1.252241 | -1.778941 |
| C  | -1.711316 | -0.394325 | -0.382261 |
| C  | -1.484701 | 1.096196  | -0.321283 |
| C  | -1.498804 | 1.881901  | -1.478225 |
| C  | -1.367129 | 3.263486  | -1.395062 |
| C  | -1.208427 | 3.879398  | -0.153962 |
| C  | -1.184058 | 3.103853  | 1.995     |
| C  | -1.323433 | 1.719515  | 0.917236  |
| H  | -1.320428 | 1.111833  | 1.818585  |
| H  | -1.052110 | 3.574724  | 1.970527  |
| H  | -1.097659 | 4.957479  | -0.090534 |

|   |           |           |           |
|---|-----------|-----------|-----------|
| H | -1.379101 | 3.861749  | -2.301262 |
| H | -1.575771 | 1.389356  | -2.444312 |
| C | -3.176124 | -0.751749 | -0.674334 |
| C | -4.132541 | -0.115830 | 0.327348  |
| N | -3.777948 | -0.483252 | 1.687289  |
| H | -3.658426 | -1.528143 | 1.791107  |
| C | -4.649698 | 0.078730  | 2.698036  |
| H | -4.411049 | -0.354026 | 3.671537  |
| H | -5.720792 | -0.077972 | 2.488205  |
| H | -4.480467 | 1.160377  | 2.746931  |
| H | -5.167999 | -0.404932 | 0.084325  |
| H | -4.077164 | 0.978803  | 0.261087  |
| H | -3.445570 | -0.413924 | -1.682679 |
| H | -3.297259 | -1.840584 | -0.644600 |
| H | -1.411351 | -0.850436 | 0.563967  |
| H | 1.329315  | 0.993226  | -1.983829 |
| H | 3.522646  | 1.467797  | -0.903776 |
| O | -4.505412 | -2.755903 | 1.547471  |
| H | -5.396849 | -2.486344 | 1.837349  |

### SeFl-N16-rad

#### Bond Energy -3411.30084271 a.u.

|    |           |           |           |
|----|-----------|-----------|-----------|
| F  | 5.634152  | -0.123166 | 0.035934  |
| C  | 4.623979  | 0.584562  | 0.565542  |
| F  | 4.836166  | 0.635681  | 1.888838  |
| F  | 4.729726  | 1.833201  | 0.088525  |
| C  | 3.290818  | -0.025706 | 0.239210  |
| C  | 2.621868  | 0.358515  | -0.919500 |
| C  | 1.413825  | -0.247303 | -1.248788 |
| C  | 0.877825  | -1.231269 | -0.417984 |
| C  | 1.554584  | -1.610315 | 0.742042  |
| C  | 2.762680  | -1.007682 | 1.073575  |
| H  | 3.291339  | -1.292053 | 1.977482  |
| H  | 1.125638  | -2.376196 | 1.380317  |
| Se | -0.792196 | -2.054650 | -0.846075 |
| C  | -1.908077 | -0.783788 | 0.157407  |
| C  | -1.854482 | 0.604990  | -0.429600 |
| C  | -2.031205 | 0.824856  | -1.799236 |
| C  | -2.067178 | 2.118670  | -2.307243 |
| C  | -1.915260 | 3.211926  | -1.454722 |
| C  | -1.726088 | 3.001368  | -0.092344 |
| C  | -1.697134 | 1.703905  | 0.416693  |
| H  | -1.560411 | 1.535952  | 1.482589  |
| H  | -1.595328 | 3.846456  | 0.576931  |
| H  | -1.936490 | 4.221326  | -1.853664 |
| H  | -2.205681 | 2.275791  | -3.372792 |
| H  | -2.103824 | -0.033817 | -2.462032 |
| C  | -3.333805 | -1.353040 | 0.184368  |

|   |           |           |           |
|---|-----------|-----------|-----------|
| C | -4.298633 | -0.403294 | 0.890873  |
| N | -3.819841 | -0.058128 | 2.207355  |
| C | -4.564709 | 1.043075  | 2.760461  |
| H | -4.294871 | 1.198707  | 3.807066  |
| H | -5.652276 | 0.887482  | 2.685406  |
| H | -4.336109 | 1.962619  | 2.197141  |
| H | -5.289305 | -0.879488 | 0.988120  |
| H | -4.453885 | 0.502771  | 0.281413  |
| H | -3.687444 | -1.529851 | -0.839329 |
| H | -3.314758 | -2.319291 | 0.699767  |
| H | -1.523688 | -0.766303 | 1.179681  |
| H | 0.875869  | 0.050189  | -2.142896 |
| H | 3.040328  | 1.132441  | -1.554328 |

### SeFl-TS-C17

#### Bond Energy -3487.64707333 a.u.

|    |           |           |           |
|----|-----------|-----------|-----------|
| F  | 5.071361  | 1.694733  | 0.766326  |
| C  | 4.923922  | 0.379207  | 0.979640  |
| F  | 5.967313  | -0.230389 | 0.395473  |
| F  | 5.035483  | 0.166088  | 2.298935  |
| C  | 3.616413  | -0.128445 | 0.441806  |
| C  | 3.064045  | 0.463038  | -0.691031 |
| C  | 1.883192  | -0.042265 | -1.224276 |
| C  | 1.256295  | -1.132920 | -0.620968 |
| C  | 1.815981  | -1.719147 | 0.514757  |
| C  | 2.997862  | -1.218127 | 1.048942  |
| H  | 3.436066  | -1.665348 | 1.935042  |
| H  | 1.317993  | -2.567001 | 0.974265  |
| Se | -0.378031 | -1.823404 | -1.330018 |
| C  | -1.567476 | -0.680710 | -0.257155 |
| C  | -1.438089 | 0.778755  | -0.618337 |
| C  | -1.436032 | 1.201734  | -1.951129 |
| C  | -1.395686 | 2.556556  | -2.261715 |
| C  | -1.346752 | 3.507979  | -1.243518 |
| C  | -1.340820 | 3.094571  | 0.085200  |
| C  | -1.387998 | 1.736718  | 0.395986  |
| H  | -1.403527 | 1.409510  | 1.432482  |
| H  | -1.295641 | 3.828931  | 0.883833  |
| H  | -1.307318 | 4.565255  | -1.486795 |
| H  | -1.393477 | 2.871554  | -3.300931 |
| H  | -1.428341 | 0.451923  | -2.738255 |
| C  | -2.997185 | -1.203174 | -0.460372 |
| C  | -4.019534 | -0.396881 | 0.333652  |
| N  | -3.682520 | -0.370409 | 1.750892  |
| H  | -3.684308 | -1.316931 | 2.125894  |
| C  | -4.538667 | 0.474156  | 2.520039  |
| H  | -4.309111 | 0.409169  | 3.586193  |
| H  | -5.651379 | 0.173909  | 2.406446  |
| H  | -4.450887 | 1.511961  | 2.181452  |

|   |           |           |           |
|---|-----------|-----------|-----------|
| H | -5.034136 | -0.796977 | 0.176436  |
| H | -4.016420 | 0.641162  | -0.020866 |
| H | -3.260647 | -1.159886 | -1.524435 |
| H | -3.034791 | -2.259985 | -0.165982 |
| H | -1.279686 | -0.825885 | 0.786315  |
| H | 1.436644  | 0.415609  | -2.100726 |
| H | 3.552168  | 1.318076  | -1.147017 |
| O | -6.951250 | -0.428208 | 1.830357  |
| H | -7.156746 | 0.309055  | 1.222437  |

### SeFl-C17-rad

#### Bond Energy -3411.29739238 a.u.

|    |           |           |           |
|----|-----------|-----------|-----------|
| F  | 5.616266  | -0.211152 | 0.057628  |
| C  | 4.614495  | 0.505356  | 0.591236  |
| F  | 4.807694  | 0.515936  | 1.918443  |
| F  | 4.754795  | 1.763351  | 0.149878  |
| C  | 3.273097  | -0.066376 | 0.230134  |
| C  | 2.618862  | 0.376348  | -0.915779 |
| C  | 1.402312  | -0.193649 | -1.276320 |
| C  | 0.843365  | -1.200563 | -0.489476 |
| C  | 1.506367  | -1.639422 | 0.657375  |
| C  | 2.722393  | -1.072272 | 1.020473  |
| H  | 3.240502  | -1.403011 | 1.914717  |
| H  | 1.061099  | -2.424668 | 1.260038  |
| Se | -0.837612 | -1.974912 | -0.963756 |
| C  | -1.940871 | -0.738775 | 0.098032  |
| C  | -1.858179 | 0.681107  | -0.406051 |
| C  | -1.976568 | 0.979716  | -1.767004 |
| C  | -1.980842 | 2.300502  | -2.201774 |
| C  | -1.857475 | 3.341580  | -1.282381 |
| C  | -1.731485 | 3.052017  | 0.072853  |
| C  | -1.732805 | 1.728286  | 0.508700  |
| H  | -1.654872 | 1.500320  | 1.568845  |
| H  | -1.629540 | 3.856489  | 0.794958  |
| H  | -1.854685 | 4.372258  | -1.623255 |
| H  | -2.072868 | 2.518877  | -3.261525 |
| H  | -2.028856 | 0.160688  | -2.480025 |
| C  | -3.377094 | -1.281265 | 0.071068  |
| C  | -4.337896 | -0.399780 | 0.865876  |
| N  | -3.879019 | -0.227821 | 2.235525  |
| H  | -3.861496 | -1.099995 | 2.754792  |
| C  | -4.381242 | 0.846911  | 2.962967  |
| H  | -4.106783 | 0.879602  | 4.010985  |
| H  | -4.435098 | 1.786366  | 2.421507  |
| H  | -5.354969 | -0.816981 | 0.819731  |
| H  | -4.377106 | 0.596954  | 0.413766  |
| H  | -3.731599 | -1.345929 | -0.965249 |
| H  | -3.377465 | -2.303418 | 0.471721  |
| H  | -1.562653 | -0.785069 | 1.121574  |

|   |          |          |           |
|---|----------|----------|-----------|
| H | 0.875876 | 0.149988 | -2.160543 |
| H | 3.055051 | 1.167731 | -1.51612  |

*Structure and energies of the optimised selenofluoxetine derivatives. Level of theory ZORA-OLYP/TZ2P*

### SeFl

#### Bond Energy -8.57122944 a.u.

|    |           |           |           |
|----|-----------|-----------|-----------|
| F  | 5.545011  | 0.756206  | 0.344867  |
| C  | 4.578575  | 0.354221  | 1.207948  |
| F  | 5.139573  | -0.572982 | 2.029114  |
| F  | 4.277951  | 1.432880  | 1.989574  |
| C  | 3.350770  | -0.176515 | 0.502340  |
| C  | 3.070796  | 0.189759  | -0.814731 |
| C  | 1.907926  | -0.263867 | -1.435169 |
| C  | 1.017806  | -1.097336 | -0.751576 |
| C  | 1.309619  | -1.471760 | 0.565604  |
| C  | 2.460514  | -1.005822 | 1.192402  |
| H  | 2.672713  | -1.304538 | 2.214309  |
| H  | 0.644009  | -2.140420 | 1.102821  |
| Se | -0.536095 | -1.783638 | -1.668578 |
| C  | -2.019352 | -0.907414 | -0.602664 |
| C  | -2.009211 | 0.594355  | -0.727675 |
| C  | -2.275738 | 1.251687  | -1.938690 |
| C  | -2.282747 | 2.641310  | -2.014155 |
| C  | -2.016773 | 3.411281  | -0.879999 |
| C  | -1.744289 | 2.774264  | 0.328249  |
| C  | -1.741636 | 1.381048  | 0.400990  |
| H  | -1.534451 | 0.897719  | 1.352358  |
| H  | -1.532189 | 3.360120  | 1.219406  |
| H  | -2.018928 | 4.496653  | -0.941049 |
| H  | -2.491576 | 3.127028  | -2.964497 |
| H  | -2.462439 | 0.673950  | -2.839375 |
| C  | -3.319951 | -1.600405 | -1.043005 |
| C  | -4.527874 | -1.302941 | -0.143732 |
| N  | -4.367450 | -1.851535 | 1.199604  |
| H  | -4.274670 | -2.861645 | 1.133455  |
| C  | -5.473735 | -1.537044 | 2.095687  |
| H  | -5.318806 | -2.044    | 3.055296  |
| H  | -6.469313 | -1.827727 | 1.711585  |
| H  | -5.495960 | -0.458490 | 2.287660  |
| H  | -5.433803 | -1.683934 | -0.654286 |
| H  | -4.662997 | -0.219562 | -0.049774 |
| H  | -3.577935 | -1.311724 | -2.066769 |
| H  | -3.155678 | -2.685093 | -1.063693 |
| H  | -1.813322 | -1.185474 | 0.430269  |

|   |          |          |           |
|---|----------|----------|-----------|
| H | 1.691331 | 0.039170 | -2.454696 |
| H | 3.751912 | 0.834513 | -1.360213 |

### H<sub>2</sub>O<sub>2</sub>

#### Bond Energy -0.65281998 a.u.

|   |           |           |           |
|---|-----------|-----------|-----------|
| O | -0.015407 | -0.730641 | -0.690438 |
| O | 0.015407  | 0.730641  | -0.690438 |
| H | 0.800760  | 0.883499  | -0.140076 |
| H | -0.800760 | -0.883499 | -0.140076 |

### R-S-SeFl-RCox

#### Bond Energy -9.22904476 a.u.

|    |           |           |           |
|----|-----------|-----------|-----------|
| F  | 5.609249  | 0.945069  | 0.448017  |
| C  | 4.641500  | 0.372935  | 1.206730  |
| F  | 5.215257  | -0.669491 | 1.864092  |
| F  | 4.294777  | 1.288621  | 2.157634  |
| C  | 3.441687  | -0.058322 | 0.392077  |
| C  | 3.180056  | 0.517109  | -0.851729 |
| C  | 2.043102  | 0.146883  | -1.568303 |
| C  | 1.163404  | -0.809667 | -1.054271 |
| C  | 1.434030  | -1.392570 | 0.189253  |
| C  | 2.559530  | -1.010863 | 0.912174  |
| H  | 2.757266  | -1.469809 | 1.875925  |
| H  | 0.775038  | -2.153777 | 0.594485  |
| Se | -0.356391 | -1.355045 | -2.116016 |
| C  | -1.888069 | -0.733011 | -0.937408 |
| C  | -1.939152 | 0.768045  | -0.820326 |
| C  | -2.237489 | 1.598743  | -1.911377 |
| C  | -2.304341 | 2.980900  | -1.762810 |
| C  | -2.069635 | 3.568771  | -0.518279 |
| C  | -1.766879 | 2.758426  | 0.573414  |
| C  | -1.702530 | 1.373244  | 0.421559  |
| H  | -1.473703 | 0.752444  | 1.283906  |
| H  | -1.579894 | 3.202093  | 1.548333  |
| H  | -2.120083 | 4.648621  | -0.403812 |
| H  | -2.536990 | 3.603624  | -2.623409 |
| H  | -2.404668 | 1.165927  | -2.893590 |
| C  | -3.157366 | -1.402448 | -1.490516 |

|   |           |           |           |
|---|-----------|-----------|-----------|
| C | -4.357957 | -1.341649 | -0.535041 |
| N | -4.115593 | -2.076984 | 0.700816  |
| H | -3.908069 | -3.046667 | 0.477327  |
| C | -5.229896 | -2.031109 | 1.638584  |
| H | -5.001368 | -2.659551 | 2.504865  |
| H | -6.195830 | -2.365849 | 1.216281  |
| H | -5.365742 | -1.005496 | 2.293     |
| H | -5.244555 | -1.710472 | -1.087159 |
| H | -4.573345 | -0.299692 | -0.270944 |
| H | -3.451218 | -0.943101 | -2.439332 |
| H | -2.944454 | -2.454819 | -1.710180 |
| H | -1.666843 | -1.166474 | 0.036882  |
| H | 1.840317  | 0.610815  | -2.528458 |
| H | 3.855077  | 1.259285  | -1.264725 |
| O | -0.747872 | -5.043395 | 0.014239  |
| O | -0.957600 | -4.877232 | -1.422785 |
| H | -0.636469 | -3.960690 | -1.546187 |
| H | -0.021289 | -5.687113 | 0.004712  |

#### **R-R-SeFl-RCox**

##### **Bond Energy -9.22801464 a.u.**

|    |           |           |           |
|----|-----------|-----------|-----------|
| F  | 5.468356  | 1.127552  | 0.632624  |
| C  | 4.579     | 0.535314  | 1.458239  |
| F  | 5.242517  | -0.408482 | 2.167392  |
| F  | 4.172764  | 1.486044  | 2.353582  |
| C  | 3.388112  | -0.044295 | 0.710965  |
| C  | 3.006380  | 0.478351  | -0.525673 |
| C  | 1.886841  | -0.027050 | -1.184294 |
| C  | 1.140387  | -1.061594 | -0.613562 |
| C  | 1.530277  | -1.587865 | 0.623029  |
| C  | 2.642740  | -1.077739 | 1.285771  |
| H  | 2.934943  | -1.495741 | 2.243895  |
| H  | 0.970100  | -2.404812 | 1.067582  |
| Se | -0.370193 | -1.819103 | -1.553275 |
| C  | -1.917058 | -0.916815 | -0.586861 |
| C  | -1.885825 | 0.584884  | -0.685233 |
| C  | -2.123128 | 1.270409  | -1.886753 |
| C  | -2.110776 | 2.661597  | -1.930549 |
| C  | -1.858572 | 3.402866  | -0.774722 |
| C  | -1.617539 | 2.736951  | 0.424928  |
| C  | -1.630674 | 1.342995  | 0.466269  |
| H  | -1.447051 | 0.836140  | 1.410315  |
| H  | -1.417702 | 3.300683  | 1.332979  |
| H  | -1.847359 | 4.489285  | -0.811840 |
| H  | -2.293742 | 3.169055  | -2.874573 |
| H  | -2.304170 | 0.720691  | -2.804942 |
| C  | -3.188294 | -1.598391 | -1.118193 |
| C  | -4.444376 | -1.315570 | -0.281442 |

|   |           |           |           |
|---|-----------|-----------|-----------|
| N | -4.360523 | -1.891788 | 1.057122  |
| H | -4.274505 | -2.901430 | 0.976192  |
| C | -5.509544 | -1.582639 | 1.900100  |
| H | -5.409810 | -2.105372 | 2.856424  |
| H | -6.486149 | -1.855578 | 1.458816  |
| H | -5.531386 | -0.507801 | 2.111632  |
| H | -5.320647 | -1.682423 | -0.850470 |
| H | -4.581338 | -0.233862 | -0.173401 |
| H | -3.386211 | -1.288426 | -2.148572 |
| H | -3.026625 | -2.683439 | -1.150101 |
| H | -1.770919 | -1.214384 | 0.451157  |
| H | 1.597462  | 0.392371  | -2.142059 |
| H | 3.577513  | 1.280578  | -0.981133 |
| O | -1.400364 | -0.504148 | -5.486609 |
| O | -0.028052 | -0.583018 | -4.990730 |
| H | -0.186855 | -0.900242 | -4.079206 |
| H | -1.394300 | -1.241626 | -6.117788 |

#### **R-S-SeFl-TSox**

##### **Bond Energy -9.19767611 a.u.**

|    |           |           |           |
|----|-----------|-----------|-----------|
| F  | 5.434269  | 1.245720  | 0.508609  |
| C  | 4.561344  | 0.525074  | 1.256034  |
| F  | 5.262529  | -0.486966 | 1.824883  |
| F  | 4.148206  | 1.337169  | 2.271477  |
| C  | 3.383880  | 0.021266  | 0.446144  |
| C  | 2.986984  | 0.690914  | -0.712574 |
| C  | 1.874946  | 0.249451  | -1.426545 |
| C  | 1.160521  | -0.861546 | -0.974964 |
| C  | 1.556470  | -1.543722 | 0.176915  |
| C  | 2.665588  | -1.093877 | 0.887607  |
| H  | 2.976150  | -1.626951 | 1.780549  |
| H  | 1.018416  | -2.430231 | 0.496176  |
| Se | -0.343403 | -1.493244 | -2.021482 |
| C  | -1.903146 | -0.829437 | -0.906400 |
| C  | -1.905962 | 0.672687  | -0.821810 |
| C  | -2.193960 | 1.488504  | -1.927094 |
| C  | -2.213127 | 2.875399  | -1.806613 |
| C  | -1.945737 | 3.478815  | -0.576753 |
| C  | -1.657037 | 2.681823  | 0.529103  |
| C  | -1.635072 | 1.293321  | 0.405701  |
| H  | -1.416358 | 0.682278  | 1.277219  |
| H  | -1.448067 | 3.139348  | 1.492865  |
| H  | -1.962497 | 4.561633  | -0.483148 |
| H  | -2.438032 | 3.487960  | -2.676258 |
| H  | -2.399321 | 1.042676  | -2.896341 |
| C  | -3.165942 | -1.487728 | -1.479962 |
| C  | -4.394081 | -1.352167 | -0.566491 |
| N  | -4.189082 | -1.978868 | 0.732160  |
| H  | -3.943634 | -2.956401 | 0.601444  |

|   |           |           |           |
|---|-----------|-----------|-----------|
| C | -5.342642 | -1.885473 | 1.617561  |
| H | -5.135945 | -2.434792 | 2.540895  |
| H | -6.281663 | -2.278621 | 1.185525  |
| H | -5.516618 | -0.837593 | 1.887577  |
| H | -5.260435 | -1.768908 | -1.117028 |
| H | -4.620093 | -0.292594 | -0.397594 |
| H | -3.418744 | -1.059574 | -2.454997 |
| H | -2.963894 | -2.551069 | -1.641795 |
| H | -1.685403 | -1.264092 | 0.068689  |
| H | 1.572063  | 0.775898  | -2.326360 |
| H | 3.541201  | 1.554216  | -1.065072 |
| O | -0.339999 | -5.283790 | -0.425126 |
| O | -0.531273 | -3.394180 | -1.122031 |
| H | 0.035994  | -4.001265 | -1.633560 |
| H | -1.256214 | -5.530478 | -0.619364 |

|   |           |           |           |
|---|-----------|-----------|-----------|
| H | -6.738944 | -1.631118 | 1.190734  |
| H | -5.711339 | -0.394223 | 1.944696  |
| H | -5.402490 | -1.524427 | -1.048694 |
| H | -4.624664 | -0.148222 | -0.272762 |
| H | -3.340919 | -1.230070 | -2.188607 |
| H | -3.167879 | -2.669850 | -1.207207 |
| H | -1.956887 | -1.320719 | 0.540454  |
| H | 1.343678  | 0.166122  | -2.269154 |
| H | 3.367403  | 1.254767  | -1.349573 |
| O | -0.894278 | -0.782661 | -5.175376 |
| O | -0.589101 | -1.191909 | -3.225045 |
| H | -0.537974 | -1.949903 | -3.837112 |
| H | -0.069413 | -0.285328 | -5.277678 |

**R-S-SeFl-PCox**

**R-R-SeFl-TSox**

**Bond Energy -9.19546902 a.u.**

|    |           |           |           |
|----|-----------|-----------|-----------|
| F  | 5.418257  | 1.269472  | 0.084459  |
| C  | 4.601943  | 0.757586  | 1.037736  |
| F  | 5.351911  | -0.078672 | 1.799979  |
| F  | 4.232501  | 1.796034  | 1.840966  |
| C  | 3.389926  | 0.063805  | 0.449271  |
| C  | 2.876868  | 0.468910  | -0.784719 |
| C  | 1.735375  | -0.136648 | -1.305015 |
| C  | 1.102569  | -1.146506 | -0.580774 |
| C  | 1.614183  | -1.562004 | 0.651541  |
| C  | 2.755193  | -0.952982 | 1.167062  |
| H  | 3.150991  | -1.279189 | 2.123281  |
| H  | 1.133709  | -2.359198 | 1.211157  |
| Se | -0.446850 | -2.054058 | -1.302444 |
| C  | -2.001175 | -0.988909 | -0.498501 |
| C  | -1.838267 | 0.501978  | -0.554949 |
| C  | -1.999980 | 1.243021  | -1.737143 |
| C  | -1.885891 | 2.630972  | -1.720437 |
| C  | -1.610551 | 3.307756  | -0.531820 |
| C  | -1.443915 | 2.583408  | 0.647390  |
| C  | -1.554328 | 1.194779  | 0.632488  |
| H  | -1.431954 | 0.641293  | 1.560343  |
| H  | -1.229622 | 3.097631  | 1.580990  |
| H  | -1.525699 | 4.391625  | -0.525246 |
| H  | -2.010399 | 3.185890  | -2.647003 |
| H  | -2.187206 | 0.740750  | -2.679184 |
| C  | -3.257410 | -1.576273 | -1.156425 |
| C  | -4.551534 | -1.233165 | -0.404396 |
| N  | -4.603881 | -1.850375 | 0.918071  |
| H  | -4.608115 | -2.861073 | 0.807979  |
| C  | -5.772761 | -1.460245 | 1.699701  |
| H  | -5.780907 | -2.016150 | 2.642282  |

**Bond Energy -9.29112167 a.u.**

|    |           |           |           |
|----|-----------|-----------|-----------|
| F  | 5.255740  | 0.876982  | 1.004005  |
| C  | 4.344196  | 0.131480  | 1.679447  |
| F  | 5.005742  | -0.928543 | 2.204808  |
| F  | 3.919953  | 0.891322  | 2.731644  |
| C  | 3.181202  | -0.286636 | 0.803682  |
| C  | 2.739682  | 0.562284  | -0.214705 |
| C  | 1.640572  | 0.205201  | -0.992868 |
| C  | 0.982359  | -0.995895 | -0.736679 |
| C  | 1.423078  | -1.856173 | 0.263238  |
| C  | 2.521913  | -1.496163 | 1.039859  |
| H  | 2.869133  | -2.165239 | 1.820396  |
| H  | 0.920578  | -2.806619 | 0.418562  |
| Se | -0.528928 | -1.572332 | -1.877218 |
| C  | -2.042948 | -0.675141 | -0.761370 |
| C  | -2.046525 | 0.801961  | -1.011983 |
| C  | -2.393565 | 1.349646  | -2.259024 |
| C  | -2.393343 | 2.727459  | -2.463248 |
| C  | -2.050367 | 3.593179  | -1.424361 |
| C  | -1.703116 | 3.066487  | -0.180992 |
| C  | -1.696608 | 1.687720  | 0.019704  |
| H  | -1.426915 | 1.290539  | 0.994739  |
| H  | -1.436510 | 3.730284  | 0.637783  |
| H  | -2.054939 | 4.668461  | -1.583154 |
| H  | -2.663969 | 3.126301  | -3.437834 |
| H  | -2.666686 | 0.698265  | -3.084730 |
| C  | -3.325585 | -1.446495 | -1.076564 |
| C  | -4.448758 | -1.216035 | -0.052652 |
| N  | -4.094958 | -1.705353 | 1.274650  |
| H  | -3.896646 | -2.700682 | 1.218137  |
| C  | -5.129137 | -1.481380 | 2.277318  |
| H  | -4.821540 | -1.936068 | 3.223977  |
| H  | -6.121950 | -1.886664 | 2.007237  |
| H  | -5.247578 | -0.405773 | 2.450562  |

|   |           |           |           |
|---|-----------|-----------|-----------|
| H | -5.367457 | -1.687514 | -0.452983 |
| H | -4.666323 | -0.144472 | 0.030642  |
| H | -3.708258 | -1.179067 | -2.066734 |
| H | -3.091063 | -2.516627 | -1.109593 |
| H | -1.730761 | -0.892930 | 0.260243  |
| H | 1.313729  | 0.867273  | -1.789821 |
| H | 3.255012  | 1.497023  | -0.410312 |
| O | 1.277128  | -5.157992 | -2.647144 |
| O | -0.701913 | -3.188032 | -1.515424 |
| H | 0.597823  | -4.555425 | -2.298889 |
| H | 0.778256  | -5.932554 | -2.931306 |

**R-R-SeFl-PCox**

**Bond Energy -9.29051152 a.u.**

|    |           |           |           |
|----|-----------|-----------|-----------|
| F  | 5.426354  | 1.235948  | 0.831805  |
| C  | 4.491907  | 0.641802  | 1.613655  |
| F  | 5.134191  | -0.289625 | 2.365572  |
| F  | 4.036814  | 1.594958  | 2.477633  |
| C  | 3.356426  | 0.043698  | 0.809369  |
| C  | 3.040799  | 0.550195  | -0.453650 |
| C  | 1.965344  | 0.027047  | -1.168886 |
| C  | 1.206055  | -0.993321 | -0.609154 |
| C  | 1.518643  | -1.516391 | 0.644607  |
| C  | 2.592934  | -0.991369 | 1.358133  |
| H  | 2.839478  | -1.395299 | 2.334803  |
| H  | 0.941649  | -2.331845 | 1.074971  |
| Se | -0.261406 | -1.778674 | -1.669091 |
| C  | -1.857767 | -0.850011 | -0.692455 |
| C  | -1.778109 | 0.641262  | -0.724921 |
| C  | -2.034294 | 1.382038  | -1.891272 |
| C  | -1.963503 | 2.773432  | -1.879113 |
| C  | -1.641141 | 3.456964  | -0.707198 |
| C  | -1.383649 | 2.735102  | 0.458130  |
| C  | -1.447288 | 1.344376  | 0.445803  |
| H  | -1.250544 | 0.794604  | 1.362753  |
| H  | -1.134449 | 3.254965  | 1.379991  |
| H  | -1.592566 | 4.543020  | -0.701210 |
| H  | -2.162054 | 3.325999  | -2.794216 |
| H  | -2.279507 | 0.876578  | -2.818013 |
| C  | -3.121730 | -1.500135 | -1.267950 |
| C  | -4.368858 | -1.285479 | -0.397085 |
| N  | -4.267232 | -1.967416 | 0.890960  |
| H  | -4.219507 | -2.969570 | 0.726109  |
| C  | -5.386073 | -1.694782 | 1.787036  |
| H  | -5.278151 | -2.294875 | 2.695914  |
| H  | -6.380411 | -1.904778 | 1.352025  |
| H  | -5.370467 | -0.640118 | 2.083257  |
| H  | -5.251733 | -1.605416 | -0.982105 |
| H  | -4.501441 | -0.215695 | -0.201649 |

|   |           |           |           |
|---|-----------|-----------|-----------|
| H | -3.328769 | -1.123079 | -2.271962 |
| H | -2.962746 | -2.581244 | -1.381124 |
| H | -1.695451 | -1.217453 | 0.324581  |
| H | 1.715564  | 0.401560  | -2.157205 |
| H | 3.633386  | 1.350244  | -0.885077 |
| O | -2.229772 | -1.442883 | -5.186968 |
| O | -0.102959 | -1.045257 | -3.152733 |
| H | -1.461636 | -1.342156 | -4.596854 |
| H | -1.847461 | -1.460550 | -6.071734 |

**R-S-SeFl-Ox**

**Bond Energy -8.76950646 a.u.**

|    |           |           |           |
|----|-----------|-----------|-----------|
| F  | 5.217759  | 0.882612  | 1.022200  |
| C  | 4.364011  | 0.038959  | 1.656127  |
| F  | 5.092715  | -1.028430 | 2.069675  |
| F  | 3.940641  | 0.684121  | 2.782417  |
| C  | 3.194713  | -0.364168 | 0.782837  |
| C  | 2.728234  | 0.505414  | -0.206278 |
| C  | 1.620934  | 0.155555  | -0.977100 |
| C  | 0.979444  | -1.058963 | -0.743931 |
| C  | 1.445976  | -1.939116 | 0.227056  |
| C  | 2.551618  | -1.587168 | 0.997273  |
| H  | 2.916462  | -2.270426 | 1.757639  |
| H  | 0.951281  | -2.897181 | 0.363358  |
| Se | -0.547658 | -1.640542 | -1.870164 |
| C  | -2.044403 | -0.722176 | -0.728549 |
| C  | -2.070048 | 0.747719  | -1.010095 |
| C  | -2.452872 | 1.265876  | -2.259669 |
| C  | -2.470184 | 2.638771  | -2.493935 |
| C  | -2.109166 | 3.530671  | -1.483605 |
| C  | -1.726445 | 3.034143  | -0.238155 |
| C  | -1.702998 | 1.660247  | -0.007558 |
| H  | -1.406138 | 1.287195  | 0.969161  |
| H  | -1.445926 | 3.718060  | 0.559242  |
| H  | -2.127464 | 4.602108  | -1.665828 |
| H  | -2.768737 | 3.013470  | -3.470034 |
| H  | -2.740260 | 0.594045  | -3.063858 |
| C  | -3.323949 | -1.515384 | -0.994516 |
| C  | -4.420675 | -1.289893 | 0.058553  |
| N  | -4.023049 | -1.760921 | 1.380309  |
| H  | -3.806628 | -2.752584 | 1.326074  |
| C  | -5.034876 | -1.548517 | 2.407512  |
| H  | -4.694347 | -1.989036 | 3.349683  |
| H  | -6.026592 | -1.974900 | 2.166801  |
| H  | -5.169845 | -0.473905 | 2.575249  |
| H  | -5.343871 | -1.778495 | -0.309937 |
| H  | -4.651214 | -0.220603 | 0.137787  |
| H  | -3.740132 | -1.267090 | -1.976196 |
| H  | -3.073400 | -2.582411 | -1.022265 |

|   |           |           |           |
|---|-----------|-----------|-----------|
| H | -1.703475 | -0.914761 | 0.288848  |
| H | 1.273719  | 0.835649  | -1.749995 |
| H | 3.229166  | 1.451447  | -0.383875 |
| O | -0.708561 | -3.251186 | -1.514066 |

|   |           |           |           |
|---|-----------|-----------|-----------|
| H | 3.445398  | 1.087412  | -1.357290 |
| O | -0.520213 | -1.402073 | -3.116690 |

**R-S-SeFl-TSelim**

**Bond Energy -8.74737682 a.u.**

**R-R-SeFl-Ox**

**Bond Energy -8.76769791 a.u.**

|    |           |           |           |
|----|-----------|-----------|-----------|
| F  | 5.330906  | 1.138458  | 0.239928  |
| C  | 4.467771  | 0.598381  | 1.134733  |
| F  | 5.173561  | -0.289954 | 1.883279  |
| F  | 4.092399  | 1.604887  | 1.976789  |
| C  | 3.265847  | -0.041039 | 0.472449  |
| C  | 2.869801  | 0.348912  | -0.808981 |
| C  | 1.735366  | -0.213360 | -1.391635 |
| C  | 0.998064  | -1.153801 | -0.683007 |
| C  | 1.391403  | -1.561427 | 0.590666  |
| C  | 2.524242  | -0.998459 | 1.172272  |
| H  | 2.833144  | -1.312163 | 2.164405  |
| H  | 0.831516  | -2.316259 | 1.138525  |
| Se | -0.553196 | -2.002208 | -1.574725 |
| C  | -2.063102 | -0.972583 | -0.560388 |
| C  | -1.937269 | 0.511812  | -0.667588 |
| C  | -2.178628 | 1.200336  | -1.868716 |
| C  | -2.063400 | 2.587459  | -1.929747 |
| C  | -1.710235 | 3.319824  | -0.796766 |
| C  | -1.464487 | 2.650202  | 0.401812  |
| C  | -1.572462 | 1.263367  | 0.462062  |
| H  | -1.383209 | 0.755146  | 1.404242  |
| H  | -1.188927 | 3.208239  | 1.293400  |
| H  | -1.626855 | 4.402588  | -0.847053 |
| H  | -2.249213 | 3.098530  | -2.871365 |
| H  | -2.437539 | 0.651505  | -2.766953 |
| C  | -3.371546 | -1.598598 | -1.057508 |
| C  | -4.588737 | -1.272704 | -0.178927 |
| N  | -4.487825 | -1.870955 | 1.149413  |
| H  | -4.477903 | -2.882975 | 1.052883  |
| C  | -5.577424 | -1.496669 | 2.044325  |
| H  | -5.473830 | -2.038867 | 2.989346  |
| H  | -6.587620 | -1.696525 | 1.641867  |
| H  | -5.516567 | -0.426096 | 2.268998  |
| H  | -5.498630 | -1.591377 | -0.723035 |
| H  | -4.670775 | -0.187496 | -0.053423 |
| H  | -3.584155 | -1.273753 | -2.079585 |
| H  | -3.262451 | -2.690982 | -1.105494 |
| H  | -1.873537 | -1.297903 | 0.465952  |
| H  | 1.421294  | 0.068407  | -2.392768 |

|    |           |           |           |
|----|-----------|-----------|-----------|
| F  | 4.974279  | -0.936514 | 2.552980  |
| C  | 3.950175  | -1.826286 | 2.484698  |
| F  | 4.502790  | -3.061114 | 2.370316  |
| F  | 3.323180  | -1.791079 | 3.698138  |
| C  | 2.991781  | -1.515912 | 1.357868  |
| C  | 2.776211  | -0.190808 | 0.966118  |
| C  | 1.853896  | 0.101498  | -0.033361 |
| C  | 1.136511  | -0.930389 | -0.647453 |
| C  | 1.355155  | -2.255126 | -0.265327 |
| C  | 2.275862  | -2.544126 | 0.737854  |
| H  | 2.443695  | -3.576488 | 1.028294  |
| H  | 0.813232  | -3.055037 | -0.760863 |
| Se | -0.103394 | -0.488504 | -2.074563 |
| C  | -2.507573 | 0.208310  | -0.736915 |
| C  | -2.807188 | 1.429418  | -1.465811 |
| C  | -3.494587 | 1.457645  | -2.698803 |
| C  | -3.783154 | 2.661755  | -3.329502 |
| C  | -3.404539 | 3.875621  | -2.751050 |
| C  | -2.726495 | 3.871055  | -1.530485 |
| C  | -2.428194 | 2.668379  | -0.902199 |
| H  | -1.899914 | 2.675945  | 0.048351  |
| H  | -2.430126 | 4.809344  | -1.067937 |
| H  | -3.635920 | 4.814700  | -3.246880 |
| H  | -4.309178 | 2.655628  | -4.281060 |
| H  | -3.796043 | 0.530138  | -3.174930 |
| C  | -3.049324 | -1.087630 | -0.974848 |
| C  | -3.372299 | -1.998783 | 0.219211  |
| N  | -2.306893 | -2.070706 | 1.208581  |
| H  | -1.481141 | -2.474554 | 0.778753  |
| C  | -2.659093 | -2.852460 | 2.387295  |
| H  | -1.790536 | -2.919774 | 3.049582  |
| H  | -3.004973 | -3.879784 | 2.167795  |
| H  | -3.458272 | -2.346551 | 2.940944  |
| H  | -3.658152 | -2.990327 | -0.180783 |
| H  | -4.265087 | -1.606692 | 0.726381  |
| H  | -3.860868 | -1.116569 | -1.706191 |
| H  | -2.140764 | -1.649624 | -1.609425 |
| H  | -1.996    | 0.346473  | 0.208727  |
| H  | 1.698206  | 1.137997  | -0.324386 |
| H  | 3.326400  | 0.615547  | 1.440355  |
| O  | -0.965184 | -1.947387 | -2.323290 |

**R-R-SeFl-TSelim**



**Bond Energy -8.74867977 a.u.**

|    |           |           |           |
|----|-----------|-----------|-----------|
| F  | 5.237694  | -0.091881 | -1.457381 |
| C  | 4.511313  | 0.603518  | -0.544723 |
| F  | 5.297017  | 0.761053  | 0.552150  |
| F  | 4.322097  | 1.851834  | -1.068828 |
| C  | 3.196279  | -0.066812 | -0.221391 |
| C  | 2.537030  | -0.827578 | -1.191612 |
| C  | 1.302581  | -1.406616 | -0.913591 |
| C  | 0.717130  | -1.221499 | 0.339555  |
| C  | 1.371046  | -0.460838 | 1.313726  |
| C  | 2.605273  | 0.115372  | 1.032700  |
| H  | 3.107113  | 0.704742  | 1.793244  |
| H  | 0.927443  | -0.310754 | 2.295374  |
| Se | -0.976993 | -2.046051 | 0.786641  |
| C  | -2.880478 | -0.098313 | -0.170963 |
| C  | -2.167471 | 1.162717  | -0.104884 |
| C  | -1.426364 | 1.703150  | -1.178630 |
| C  | -0.810886 | 2.943869  | -1.070634 |
| C  | -0.916350 | 3.689024  | 0.105869  |
| C  | -1.643827 | 3.174364  | 1.181056  |
| C  | -2.253435 | 1.930709  | 1.078817  |
| H  | -2.817423 | 1.538194  | 1.921803  |
| H  | -1.735215 | 3.746320  | 2.101208  |
| H  | -0.435269 | 4.660494  | 0.183605  |
| H  | -0.242590 | 3.335598  | -1.910606 |
| H  | -1.327075 | 1.147256  | -2.105048 |
| C  | -3.123961 | -0.900338 | -1.322835 |
| C  | -4.479560 | -1.617731 | -1.444980 |
| N  | -4.768518 | -2.481065 | -0.307647 |
| H  | -4.061252 | -3.209119 | -0.268112 |
| C  | -6.089165 | -3.094347 | -0.361591 |
| H  | -6.204775 | -3.780262 | 0.483326  |
| H  | -6.293019 | -3.658140 | -1.290977 |
| H  | -6.861098 | -2.321750 | -0.268319 |
| H  | -4.483984 | -2.160925 | -2.409021 |
| H  | -5.281967 | -0.869965 | -1.510250 |
| H  | -2.827838 | -0.449211 | -2.272270 |
| H  | -2.318878 | -1.831536 | -1.191219 |
| H  | -3.463237 | -0.345249 | 0.712932  |
| H  | 0.796094  | -2.009742 | -1.660574 |
| H  | 2.990319  | -0.978403 | -2.166311 |
| O  | -1.441897 | -2.808940 | -0.676512 |

**R-S-SeFl-PCelim****Bond Energy -8.78737727 a.u.**

|   |          |           |          |
|---|----------|-----------|----------|
| F | 4.962890 | -2.012189 | 3.002109 |
| C | 3.756043 | -2.543778 | 2.680695 |

|    |           |           |           |
|----|-----------|-----------|-----------|
| F  | 3.934967  | -3.883717 | 2.541169  |
| F  | 2.951950  | -2.373060 | 3.773269  |
| C  | 3.155859  | -1.914323 | 1.446275  |
| C  | 3.496112  | -0.610443 | 1.075129  |
| C  | 2.892055  | -0.013644 | -0.026474 |
| C  | 1.946282  | -0.720955 | -0.779245 |
| C  | 1.608765  | -2.028027 | -0.415432 |
| C  | 2.205589  | -2.613810 | 0.696387  |
| H  | 1.936427  | -3.629441 | 0.969880  |
| H  | 0.887226  | -2.587875 | -1.863    |
| Se | 1.197935  | 0.149884  | -2.321883 |
| C  | -3.233716 | 0.413258  | -0.472023 |
| C  | -3.461909 | 1.528873  | -1.401146 |
| C  | -4.014412 | 1.384554  | -2.688392 |
| C  | -4.206345 | 2.486007  | -3.514960 |
| C  | -3.854161 | 3.767389  | -3.084321 |
| C  | -3.305451 | 3.931854  | -1.813802 |
| C  | -3.111938 | 2.827619  | -0.987531 |
| H  | -2.683126 | 2.969305  | 0.001852  |
| H  | -3.026122 | 4.922547  | -1.463313 |
| H  | -4.005834 | 4.625534  | -3.733955 |
| H  | -4.633724 | 2.344959  | -4.504895 |
| H  | -4.297284 | 0.402430  | -3.055158 |
| C  | -3.554091 | -0.881183 | -0.638395 |
| C  | -3.330186 | -1.988775 | 0.351356  |
| N  | -2.541516 | -1.627656 | 1.516670  |
| H  | -1.615157 | -1.339645 | 1.216013  |
| C  | -2.411257 | -2.706602 | 2.488263  |
| H  | -1.741397 | -2.389281 | 3.292799  |
| H  | -2.021875 | -3.653584 | 2.070023  |
| H  | -3.388381 | -2.919438 | 2.936118  |
| H  | -2.916913 | -2.861475 | -0.198636 |
| H  | -4.317038 | -2.329037 | 0.704952  |
| H  | -4.046752 | -1.212218 | -1.551972 |
| H  | -0.967416 | -0.553130 | -2.177366 |
| H  | -2.774167 | 0.696724  | 0.472855  |
| H  | 3.158010  | 1.008621  | -0.285293 |
| H  | 4.227001  | -0.051027 | 1.649789  |
| O  | -0.223417 | -0.933682 | -2.670730 |

**R-R-SeFl-PCelim****Bond Energy -8.78733884 a.u.**

|   |          |           |           |
|---|----------|-----------|-----------|
| F | 5.623680 | -0.081533 | -1.832517 |
| C | 5.313246 | 0.222269  | -0.546097 |
| F | 6.353629 | -0.195453 | 0.223404  |
| F | 5.295057 | 1.586368  | -0.462224 |
| C | 3.999862 | -0.380499 | -0.109224 |
| C | 3.003511 | -0.671897 | -1.043332 |
| C | 1.775008 | -1.184389 | -0.634557 |

|    |           |           |           |
|----|-----------|-----------|-----------|
| C  | 1.530299  | -1.457    | 0.722934  |
| C  | 2.524196  | -1.105196 | 1.665462  |
| C  | 3.749961  | -0.600318 | 1.249631  |
| H  | 4.512221  | -0.377208 | 1.989380  |
| H  | 2.351535  | -1.263154 | 2.727761  |
| Se | -0.122369 | -2.123166 | 1.386316  |
| C  | -3.801787 | 0.296856  | -0.462936 |
| C  | -3.004308 | 1.528209  | -0.371731 |
| C  | -2.356870 | 2.131113  | -1.467514 |
| C  | -1.617018 | 3.297859  | -1.311331 |
| C  | -1.497657 | 3.900681  | -0.056832 |
| C  | -2.128891 | 3.318898  | 1.040971  |
| C  | -2.868777 | 2.149503  | 0.883648  |
| H  | -3.356111 | 1.705261  | 1.748546  |
| H  | -2.044349 | 3.774716  | 2.024510  |
| H  | -0.915947 | 4.811192  | 0.061071  |
| H  | -1.125792 | 3.740743  | -2.174515 |
| H  | -2.424863 | 1.684956  | -2.455169 |
| C  | -4.130388 | -0.393163 | -1.568457 |
| C  | -4.964255 | -1.641649 | -1.625666 |
| N  | -5.228658 | -2.265595 | -0.339418 |
| H  | -4.346564 | -2.567821 | 0.063954  |
| C  | -6.125855 | -3.411919 | -0.424540 |
| H  | -6.212788 | -3.876144 | 0.562447  |
| H  | -5.806792 | -4.189498 | -1.143088 |
| H  | -7.126107 | -3.076314 | -0.720445 |
| H  | -4.492797 | -2.335096 | -2.353557 |
| H  | -5.933877 | -1.380183 | -2.079836 |
| H  | -3.803460 | -0.046270 | -2.547954 |
| H  | -1.584806 | -1.394576 | -0.214450 |
| H  | -4.186509 | -0.070731 | 0.486719  |
| H  | 1.015607  | -1.419807 | -1.372086 |
| H  | 3.183345  | -0.508003 | -2.100950 |
| O  | -1.101479 | -2.233188 | -0.144768 |

### Compound 6'

**Bond Energy -5.14894703 a.u.**

|   |           |          |           |
|---|-----------|----------|-----------|
| C | -3.256798 | 0.425114 | -0.447819 |
| C | -3.465263 | 1.533505 | -1.388627 |
| C | -3.948462 | 1.371799 | -2.701340 |
| C | -4.130634 | 2.465663 | -3.540243 |
| C | -3.833194 | 3.757226 | -3.098760 |
| C | -3.346523 | 3.938467 | -1.805316 |
| C | -3.163878 | 2.841704 | -0.966449 |
| H | -2.784237 | 2.997039 | 0.040935  |
| H | -3.106699 | 4.936767 | -1.446879 |
| H | -3.975227 | 4.609420 | -3.758450 |
| H | -4.503309 | 2.310347 | -4.550145 |

|   |           |           |           |
|---|-----------|-----------|-----------|
| H | -4.176829 | 0.379743  | -3.079079 |
| C | -3.625243 | -0.857224 | -0.595070 |
| C | -3.396625 | -1.968972 | 0.388078  |
| N | -2.528322 | -1.633915 | 1.504618  |
| H | -1.620671 | -1.356109 | 1.142505  |
| C | -2.353435 | -2.725609 | 2.453422  |
| H | -1.630921 | -2.427636 | 3.219373  |
| H | -2.005160 | -3.673593 | 2.001826  |
| H | -3.303905 | -2.930250 | 2.959191  |
| H | -3.044572 | -2.857417 | -0.179058 |
| H | -4.373156 | -2.272304 | 0.799890  |
| H | -4.153354 | -1.175749 | -1.492824 |
| H | -2.766335 | 0.704143  | 0.482622  |

### Compound 7

**Bond Energy -3.63585314 a.u.**

|    |           |           |           |
|----|-----------|-----------|-----------|
| Se | -0.425902 | 1.868544  | 0.712233  |
| C  | -1.766419 | 0.526881  | 0.390634  |
| C  | -3.035623 | 0.969160  | -0.004977 |
| C  | -4.054763 | 0.050668  | -0.225523 |
| C  | -3.820761 | -1.318726 | -0.060639 |
| C  | -2.552300 | -1.753606 | 0.328803  |
| C  | -1.528679 | -0.838310 | 0.561408  |
| H  | -3.239403 | 2.028078  | -0.147536 |
| H  | -5.034295 | 0.405641  | -0.529928 |
| H  | -2.356450 | -2.812438 | 0.463625  |
| H  | -0.553307 | -1.189026 | 0.880643  |
| O  | 1.042504  | 0.828234  | 1.007607  |
| H  | 1.462651  | 0.723379  | 0.140827  |
| C  | -4.919048 | -2.310959 | -0.361369 |
| F  | -4.736461 | -3.497850 | 0.270891  |
| F  | -4.994261 | -2.588069 | -1.697331 |
| F  | -6.144148 | -1.848790 | 0.004769  |

### 1-H

**Bond Energy -8.51449492 a.u.**

|    |           |           |           |
|----|-----------|-----------|-----------|
| C  | 3.353566  | -0.167137 | 0.545062  |
| C  | 2.968038  | 0.409967  | -0.664155 |
| C  | 1.826750  | -0.043243 | -1.327551 |
| C  | 1.067574  | -1.086362 | -0.786643 |
| C  | 1.463432  | -1.671872 | 0.421865  |
| C  | 2.597586  | -1.207170 | 1.087443  |
| H  | 2.896197  | -1.667168 | 2.026649  |
| H  | 0.890800  | -2.496231 | 0.836977  |
| Se | -0.463318 | -1.765800 | -1.753209 |
| C  | -1.976467 | -0.964874 | -0.669007 |
| C  | -2.015862 | 0.539214  | -0.752392 |

|   |           |           |           |   |           |           |           |
|---|-----------|-----------|-----------|---|-----------|-----------|-----------|
| C | -2.326565 | 1.220633  | -1.939518 | H | -1.440476 | 0.599657  | 1.299441  |
| C | -2.378476 | 2.610902  | -1.977412 | H | -1.562466 | 3.042116  | 1.620274  |
| C | -2.113627 | 3.359023  | -0.828392 | H | -2.138313 | 4.527652  | -0.292490 |
| C | -1.795562 | 2.698649  | 0.356043  | H | -2.572888 | 3.528135  | -2.529739 |
| C | -1.748287 | 1.304790  | 0.390789  | H | -2.425354 | 1.098219  | -2.855182 |
| H | -1.503328 | 0.802812  | 1.323423  | C | -3.125702 | -1.507689 | -1.535845 |
| H | -1.582446 | 3.267120  | 1.258315  | C | -4.370502 | -1.407218 | -0.636570 |
| H | -2.151629 | 4.445067  | -0.859773 | N | -4.242768 | -2.068618 | 0.660950  |
| H | -2.621802 | 3.114554  | -2.910141 | C | -5.220208 | -1.570418 | 1.618571  |
| H | -2.512939 | 0.661435  | -2.851881 | H | -5.043619 | -2.030186 | 2.596127  |
| C | -3.252927 | -1.690246 | -1.125157 | H | -6.269486 | -1.783432 | 1.331710  |
| C | -4.482112 | -1.429073 | -0.238296 | H | -5.114113 | -0.487444 | 1.731995  |
| N | -4.352859 | -1.895353 | 1.142589  | H | -5.233269 | -1.799868 | -1.212001 |
| C | -5.306808 | -1.239081 | 2.025840  | H | -4.581735 | -0.350752 | -0.449064 |
| H | -5.128956 | -1.554527 | 3.058920  | H | -3.383314 | -1.054612 | -2.498782 |
| H | -6.364133 | -1.465531 | 1.782245  | H | -2.907400 | -2.558196 | -1.746240 |
| H | -5.173801 | -0.154384 | 1.977850  | H | -1.657970 | -1.292490 | 0.020208  |
| H | -5.363184 | -1.880219 | -0.738084 | H | 1.614598  | 0.826906  | -2.389910 |
| H | -4.666369 | -0.351720 | -0.205282 | H | 3.605723  | 1.572109  | -1.120649 |
| H | -3.518971 | -1.388239 | -2.143561 | O | -0.060380 | -5.233645 | -0.194885 |
| H | -3.050609 | -2.764209 | -1.175667 | O | -0.632092 | -4.964027 | -1.512297 |
| H | -1.755584 | -1.261858 | 0.356045  | H | -0.418291 | -4.012576 | -1.612990 |
| H | 1.523623  | 0.415048  | -2.263783 | H | 0.706974  | -5.770610 | -0.450313 |
| H | 3.552397  | 1.220486  | -1.093401 | C | -4.285318 | -3.523403 | 0.575099  |
| H | 4.241445  | 0.188866  | 1.061747  | H | -4.128444 | -3.951081 | 1.569797  |
| C | -4.429195 | -3.343885 | 1.271463  | H | -5.250989 | -3.905513 | 0.188236  |
| H | -4.269041 | -3.626771 | 2.316339  | H | -3.489359 | -3.901455 | -0.068767 |
| H | -5.406514 | -3.758658 | 0.952643  | H | 4.296856  | 0.361038  | 0.938545  |
| H | -3.649674 | -3.827885 | 0.678979  |   |           |           |           |

### ***R-R-1-H-RCox***

### ***R-S-1-H-RCox***

#### **Bond Energy -9.17259827 a.u.**

|    |           |           |           |
|----|-----------|-----------|-----------|
| C  | 3.426242  | 0.031069  | 0.377229  |
| C  | 3.039882  | 0.709072  | -0.777975 |
| C  | 1.919862  | 0.289888  | -1.497178 |
| C  | 1.185827  | -0.819758 | -1.065965 |
| C  | 1.580282  | -1.507229 | 0.087591  |
| C  | 2.693155  | -1.074983 | 0.808748  |
| H  | 2.992258  | -1.611969 | 1.705912  |
| H  | 1.028264  | -2.381044 | 0.419487  |
| Se | -0.319912 | -1.423755 | -2.120514 |
| C  | -1.872249 | -0.840297 | -0.947754 |
| C  | -1.934885 | 0.657225  | -0.796689 |
| C  | -2.250629 | 1.510323  | -1.865494 |
| C  | -2.325788 | 2.888465  | -1.685661 |
| C  | -2.081012 | 3.450950  | -0.431393 |
| C  | -1.758925 | 2.618646  | 0.638141  |
| C  | -1.687068 | 1.237756  | 0.454729  |

#### **Bond Energy -9.17186777 a.u.**

|    |           |           |           |
|----|-----------|-----------|-----------|
| C  | 3.411879  | -0.045282 | 0.724896  |
| C  | 2.985478  | 0.567574  | -0.452645 |
| C  | 1.878009  | 0.072964  | -1.142782 |
| C  | 1.193283  | -1.045173 | -0.655575 |
| C  | 1.627283  | -1.664779 | 0.522147  |
| C  | 2.730188  | -1.161104 | 1.211560  |
| H  | 3.060692  | -1.647799 | 2.126161  |
| H  | 1.108752  | -2.543282 | 0.895035  |
| Se | -0.295890 | -1.791643 | -1.638624 |
| C  | -1.874622 | -0.979346 | -0.646632 |
| C  | -1.900891 | 0.525102  | -0.698057 |
| C  | -2.181720 | 1.237872  | -1.874171 |
| C  | -2.223001 | 2.629255  | -1.875241 |
| C  | -1.981625 | 3.344624  | -0.700947 |
| C  | -1.695846 | 2.651993  | 0.473544  |
| C  | -1.655580 | 1.257968  | 0.471779  |
| H  | -1.435534 | 0.729909  | 1.396229  |
| H  | -1.502443 | 3.195200  | 1.395543  |

|   |           |           |           |
|---|-----------|-----------|-----------|
| H | -2.012871 | 4.431346  | -0.704582 |
| H | -2.439412 | 3.157566  | -2.800635 |
| H | -2.355450 | 0.709638  | -2.806246 |
| C | -3.119179 | -1.694262 | -1.195795 |
| C | -4.396434 | -1.452066 | -0.373081 |
| N | -4.343296 | -1.949513 | 1.001806  |
| C | -5.336688 | -1.304169 | 1.849388  |
| H | -5.214660 | -1.643873 | 2.882843  |
| H | -6.381570 | -1.515878 | 1.546729  |
| H | -5.192809 | -0.219984 | 1.832673  |
| H | -5.247433 | -1.890937 | -0.931870 |
| H | -4.582052 | -0.375578 | -0.327065 |
| H | -3.325299 | -1.369025 | -2.220366 |
| H | -2.915326 | -2.767666 | -1.257159 |
| H | -1.713552 | -1.300608 | 0.382431  |
| H | 1.548108  | 0.559163  | -2.055100 |
| H | 3.512823  | 1.436711  | -0.838396 |
| O | -1.419486 | -0.490093 | -5.494878 |
| O | -0.043196 | -0.423666 | -5.008691 |
| H | -0.158698 | -0.766019 | -4.098671 |
| H | -1.343141 | -1.229501 | -6.119095 |
| C | -4.438005 | -3.399859 | 1.093588  |
| H | -4.333659 | -3.707677 | 2.138451  |
| H | -5.401048 | -3.798084 | 0.715987  |
| H | -3.633261 | -3.877919 | 0.530571  |
| H | 4.274849  | 0.342675  | 1.260354  |

### **R-S-1-H-TSox**

#### **Bond Energy -9.14253720 a.u.**

|    |           |           |           |
|----|-----------|-----------|-----------|
| C  | 3.385486  | 0.026386  | 0.522768  |
| C  | 3.015980  | 0.724089  | -0.626594 |
| C  | 1.922347  | 0.300540  | -1.382239 |
| C  | 1.204419  | -0.827407 | -0.976008 |
| C  | 1.574539  | -1.541631 | 0.165929  |
| C  | 2.665705  | -1.103076 | 0.915038  |
| H  | 2.959161  | -1.656747 | 1.803470  |
| H  | 1.031780  | -2.438713 | 0.445721  |
| Se | -0.269704 | -1.432429 | -2.076351 |
| C  | -1.856723 | -0.880850 | -0.940430 |
| C  | -1.925092 | 0.619257  | -0.831893 |
| C  | -2.262421 | 1.436609  | -1.922076 |
| C  | -2.339714 | 2.819771  | -1.783372 |
| C  | -2.081456 | 3.418999  | -0.549581 |
| C  | -1.743095 | 2.620844  | 0.541323  |
| C  | -1.663598 | 1.236208  | 0.399386  |
| H  | -1.404859 | 0.624445  | 1.259292  |
| H  | -1.547    | 3.074838  | 1.508132  |
| H  | -2.143466 | 4.498869  | -0.441534 |
| H  | -2.602438 | 3.432622  | -2.642203 |

|   |           |           |           |
|---|-----------|-----------|-----------|
| H | -2.460826 | 0.994631  | -2.894455 |
| C | -3.093552 | -1.586044 | -1.513162 |
| C | -4.335055 | -1.474179 | -0.608707 |
| N | -4.165423 | -2.013506 | 0.737483  |
| C | -5.206857 | -1.536784 | 1.637227  |
| H | -5.006100 | -1.893663 | 2.652051  |
| H | -6.223724 | -1.876151 | 1.356064  |
| H | -5.210456 | -0.442704 | 1.659525  |
| H | -5.175737 | -1.960024 | -1.145252 |
| H | -4.603438 | -0.418527 | -0.507567 |
| H | -3.364430 | -1.162816 | -2.486097 |
| H | -2.850786 | -2.635548 | -1.686561 |
| H | -1.611962 | -1.317735 | 0.027349  |
| H | 1.632731  | 0.848241  | -2.274181 |
| H | 3.576343  | 1.601554  | -0.939347 |
| O | -0.250984 | -5.353604 | -0.808390 |
| O | -0.439375 | -3.419259 | -1.355074 |
| H | 0.238435  | -3.928644 | -1.835484 |
| H | -1.083807 | -5.627232 | -1.220447 |
| C | -4.058158 | -3.468421 | 0.774714  |
| H | -3.910195 | -3.792589 | 1.808714  |
| H | -4.961533 | -3.977507 | 0.384502  |
| H | -3.194606 | -3.812603 | 0.203913  |
| H | 4.238691  | 0.358234  | 1.108994  |

### **R-R-1-H-TSox**

#### **Bond Energy -9.14042289 a.u.**

|    |           |           |           |
|----|-----------|-----------|-----------|
| C  | 3.397532  | 0.097568  | 0.490096  |
| C  | 2.889647  | 0.528329  | -0.735265 |
| C  | 1.763777  | -0.081939 | -1.287940 |
| C  | 1.148416  | -1.127439 | -0.598033 |
| C  | 1.655377  | -1.572917 | 0.626657  |
| C  | 2.780953  | -0.953275 | 1.169383  |
| H  | 3.176651  | -1.297975 | 2.121484  |
| H  | 1.182939  | -2.397246 | 1.153602  |
| Se | -0.370049 | -2.050738 | -1.362390 |
| C  | -1.966875 | -1.062449 | -0.550735 |
| C  | -1.854366 | 0.434732  | -0.567663 |
| C  | -2.032632 | 1.199854  | -1.731950 |
| C  | -1.964617 | 2.590035  | -1.680    |
| C  | -1.719340 | 3.245880  | -0.473225 |
| C  | -1.535338 | 2.497661  | 0.688392  |
| C  | -1.599830 | 1.106954  | 0.637957  |
| H  | -1.462018 | 0.534395  | 1.551982  |
| H  | -1.343077 | 2.994896  | 1.636033  |
| H  | -1.670764 | 4.331537  | -0.439181 |
| H  | -2.101167 | 3.163307  | -2.593667 |
| H  | -2.195815 | 0.715447  | -2.687739 |
| C  | -3.195182 | -1.677294 | -1.234977 |

|   |           |           |           |
|---|-----------|-----------|-----------|
| C | -4.514803 | -1.374293 | -0.504362 |
| N | -4.602185 | -1.923624 | 0.849529  |
| C | -5.592591 | -1.222291 | 1.656663  |
| H | -5.573556 | -1.610315 | 2.680020  |
| H | -6.627541 | -1.327259 | 1.275978  |
| H | -5.353047 | -0.155851 | 1.696737  |
| H | -5.343760 | -1.732368 | -1.145693 |
| H | -4.629904 | -0.289773 | -0.430945 |
| H | -3.279407 | -1.309208 | -2.259938 |
| H | -3.063503 | -2.761709 | -1.315891 |
| H | -1.921790 | -1.416269 | 0.481230  |
| H | 1.369905  | 0.240269  | -2.245048 |
| H | 3.371023  | 1.343857  | -1.269204 |
| O | -0.847276 | -0.666653 | -5.198723 |
| O | -0.534903 | -1.139867 | -3.264237 |
| H | -0.445167 | -1.883299 | -3.887694 |
| H | -0.045333 | -0.128080 | -5.267725 |
| C | -4.834176 | -3.361978 | 0.871156  |
| H | -4.042677 | -3.891674 | 0.335856  |
| H | -4.824715 | -3.718776 | 1.905510  |
| H | -5.802716 | -3.653135 | 0.418883  |
| H | 4.276698  | 0.576411  | 0.913700  |

**R-S-1-H-PCox**

**Bond Energy -9.23622177 a.u.**

|    |           |           |           |
|----|-----------|-----------|-----------|
| C  | 3.335169  | -0.186056 | 0.567986  |
| C  | 2.855099  | 0.747650  | -0.350136 |
| C  | 1.767546  | 0.430855  | -1.165640 |
| C  | 1.165520  | -0.820961 | -1.043590 |
| C  | 1.644015  | -1.767610 | -0.140725 |
| C  | 2.731861  | -1.440756 | 0.669271  |
| H  | 3.110297  | -2.173122 | 1.378343  |
| H  | 1.186053  | -2.749602 | -0.078282 |
| Se | -0.319623 | -1.285898 | -2.261558 |
| C  | -1.886703 | -0.773003 | -0.985051 |
| C  | -1.979860 | 0.720661  | -0.908482 |
| C  | -2.389905 | 1.503501  | -2.001535 |
| C  | -2.470104 | 2.890755  | -1.902607 |
| C  | -2.145272 | 3.531588  | -0.706903 |
| C  | -1.734744 | 2.770205  | 0.386835  |
| C  | -1.648993 | 1.383619  | 0.284178  |
| H  | -1.330602 | 0.802276  | 1.145366  |
| H  | -1.480574 | 3.256553  | 1.325544  |
| H  | -2.212692 | 4.613706  | -0.628802 |
| H  | -2.789876 | 3.473165  | -2.763364 |
| H  | -2.651304 | 1.030439  | -2.944019 |
| C  | -3.116633 | -1.533836 | -1.482254 |
| C  | -4.315845 | -1.474683 | -0.516441 |
| N  | -4.068482 | -2.038587 | 0.808129  |

|   |           |           |           |
|---|-----------|-----------|-----------|
| C | -5.034184 | -1.557586 | 1.786125  |
| H | -4.772181 | -1.938884 | 2.778055  |
| H | -6.075773 | -1.869833 | 1.570682  |
| H | -5.011522 | -0.464392 | 1.829128  |
| H | -5.172046 | -1.968941 | -1.019188 |
| H | -4.602589 | -0.427764 | -0.380365 |
| H | -3.459953 | -1.133449 | -2.442584 |
| H | -2.832976 | -2.572146 | -1.670477 |
| H | -1.560179 | -1.185864 | -0.030162 |
| H | 1.402075  | 1.158720  | -1.885553 |
| H | 3.328495  | 1.722445  | -0.438527 |
| O | -0.464168 | -5.174486 | -0.392484 |
| O | -0.340367 | -2.949432 | -2.301749 |
| H | -0.422905 | -4.462891 | -1.057467 |
| H | -0.177013 | -5.959296 | -0.873430 |
| C | -3.995354 | -3.495563 | 0.812349  |
| H | -3.759120 | -3.843888 | 1.822010  |
| H | -4.944437 | -3.974445 | 0.499407  |
| H | -3.200634 | -3.851848 | 0.156093  |
| H | 4.185226  | 0.060659  | 1.199146  |

**R-R-1-H-PCox**

**Bond Energy -9.23490329 a.u.**

|    |           |           |           |
|----|-----------|-----------|-----------|
| C  | 3.289629  | -0.052036 | 1.036973  |
| C  | 3.014450  | 0.508802  | -0.210616 |
| C  | 1.967866  | 0.014158  | -0.989503 |
| C  | 1.202473  | -1.039317 | -0.501073 |
| C  | 1.474869  | -1.620593 | 0.736946  |
| C  | 2.521643  | -1.117190 | 1.509974  |
| H  | 2.740306  | -1.562336 | 2.477559  |
| H  | 0.888445  | -2.460436 | 1.104240  |
| Se | -0.216796 | -1.795763 | -1.638487 |
| C  | -1.866920 | -0.920934 | -0.701317 |
| C  | -1.812650 | 0.571801  | -0.696330 |
| C  | -2.054935 | 1.336176  | -1.850457 |
| C  | -2.008334 | 2.727978  | -1.804109 |
| C  | -1.723491 | 3.389188  | -0.609925 |
| C  | -1.478383 | 2.643767  | 0.543278  |
| C  | -1.518284 | 1.252936  | 0.496926  |
| H  | -1.329278 | 0.684613  | 1.404126  |
| H  | -1.257253 | 3.145568  | 1.482301  |
| H  | -1.693927 | 4.475540  | -0.577536 |
| H  | -2.195985 | 3.298441  | -2.710573 |
| H  | -2.271104 | 0.849712  | -2.794376 |
| C  | -3.093657 | -1.582464 | -1.339516 |
| C  | -4.391186 | -1.372455 | -0.538739 |
| N  | -4.384897 | -1.970372 | 0.797857  |
| C  | -5.359873 | -1.341470 | 1.679441  |
| H  | -5.271652 | -1.763554 | 2.685681  |

|   |           |           |           |
|---|-----------|-----------|-----------|
| H | -6.408329 | -1.477683 | 1.348245  |
| H | -5.163045 | -0.267661 | 1.746777  |
| H | -5.233315 | -1.750920 | -1.150523 |
| H | -4.555189 | -0.298019 | -0.421060 |
| H | -3.260395 | -1.196993 | -2.348268 |
| H | -2.909717 | -2.655578 | -1.461561 |
| H | -1.734491 | -1.307488 | 0.313126  |
| H | 1.743933  | 0.430264  | -1.967420 |
| H | 3.616353  | 1.334996  | -0.581494 |
| O | -2.100355 | -1.186140 | -5.169058 |
| O | -0.016236 | -1.012844 | -3.093152 |
| H | -1.345051 | -1.163288 | -4.553014 |
| H | -1.694036 | -1.145583 | -6.042213 |
| C | -4.555514 | -3.416988 | 0.777898  |
| H | -3.774669 | -3.892029 | 0.179284  |
| H | -4.473187 | -3.810091 | 1.795881  |
| H | -5.535004 | -3.734004 | 0.368275  |
| H | 4.107623  | 0.335490  | 1.639011  |

### **R-S-1-H-Ox**

**Bond Energy -11.01446300 a.u.**

|    |           |           |           |
|----|-----------|-----------|-----------|
| C  | 3.233436  | -0.328599 | 0.765608  |
| C  | 2.758577  | 0.551826  | -0.206934 |
| C  | 1.656982  | 0.202845  | -0.990344 |
| C  | 1.036098  | -1.027606 | -0.780529 |
| C  | 1.510760  | -1.921943 | 0.174579  |
| C  | 2.611694  | -1.564357 | 0.953224  |
| H  | 2.988339  | -2.256026 | 1.703253  |
| H  | 1.028571  | -2.889470 | 0.287486  |
| Se | -0.471401 | -1.600171 | -1.931176 |
| C  | -2.007685 | -0.776330 | -0.769449 |
| C  | -2.074963 | 0.702781  | -0.988416 |
| C  | -2.482648 | 1.262642  | -2.212062 |
| C  | -2.537766 | 2.643106  | -2.389314 |
| C  | -2.189582 | 3.502221  | -1.346640 |
| C  | -1.780520 | 2.964593  | -0.126820 |
| C  | -1.719979 | 1.583499  | 0.046511  |
| H  | -1.400962 | 1.178370  | 1.003246  |
| H  | -1.507926 | 3.622246  | 0.695168  |
| H  | -2.237407 | 4.579447  | -1.484256 |
| H  | -2.855525 | 3.049448  | -3.346595 |
| H  | -2.759704 | 0.617330  | -3.041094 |
| C  | -3.258433 | -1.596623 | -1.083029 |
| C  | -4.384429 | -1.428799 | -0.045893 |
| N  | -4.035547 | -1.851924 | 1.309248  |
| C  | -4.945341 | -1.293494 | 2.299383  |
| H  | -4.607965 | -1.566927 | 3.304203  |
| H  | -5.990782 | -1.644745 | 2.188449  |

|   |           |           |           |
|---|-----------|-----------|-----------|
| H | -4.947578 | -0.201401 | 2.231045  |
| H | -5.274171 | -1.970752 | -0.426219 |
| H | -4.665200 | -0.372204 | 0.002273  |
| H | -3.673288 | -1.317397 | -2.057384 |
| H | -2.973986 | -2.649316 | -1.162817 |
| H | -1.670101 | -1.102    | 0.242896  |
| H | 1.296562  | 0.889415  | -1.752051 |
| H | 3.247547  | 1.510595  | -0.362134 |
| O | -0.598083 | -3.229612 | -1.648121 |
| C | -3.924172 | -3.298282 | 1.451584  |
| H | -3.611631 | -3.539780 | 2.472027  |
| H | -4.877266 | -3.827814 | 1.253299  |
| H | -3.167495 | -3.697659 | 0.773735  |
| H | 4.094323  | -0.055573 | 1.370788  |

### **R-R-1-H-Ox**

**Bond Energy -8.71172911**

|    |           |           |           |
|----|-----------|-----------|-----------|
| C  | 3.279413  | -0.051604 | 0.558513  |
| C  | 2.892016  | 0.422384  | -0.695435 |
| C  | 1.773740  | -0.113367 | -1.335342 |
| C  | 1.049302  | -1.118201 | -0.703239 |
| C  | 1.433518  | -1.612563 | 0.542752  |
| C  | 2.551717  | -1.069703 | 1.176887  |
| H  | 2.857458  | -1.447337 | 2.149702  |
| H  | 0.878606  | -2.416321 | 1.022927  |
| Se | -0.467450 | -1.942883 | -1.666172 |
| C  | -2.027460 | -1.015253 | -0.627636 |
| C  | -1.960772 | 0.475097  | -0.690302 |
| C  | -2.233094 | 1.188258  | -1.870349 |
| C  | -2.169871 | 2.579885  | -1.892914 |
| C  | -1.838194 | 3.293086  | -0.741473 |
| C  | -1.560333 | 2.599243  | 0.436274  |
| C  | -1.616460 | 1.208266  | 0.457753  |
| H  | -1.399519 | 0.680736  | 1.383215  |
| H  | -1.299734 | 3.141898  | 1.341888  |
| H  | -1.795511 | 4.379263  | -0.761627 |
| H  | -2.378831 | 3.109568  | -2.819340 |
| H  | -2.474815 | 0.655609  | -2.782897 |
| C  | -3.303309 | -1.683246 | -1.152511 |
| C  | -4.549372 | -1.413153 | -0.290239 |
| N  | -4.475666 | -1.948825 | 1.069898  |
| C  | -5.389753 | -1.264410 | 1.974771  |
| H  | -5.248931 | -1.640479 | 2.993175  |
| H  | -6.457417 | -1.399529 | 1.710971  |
| H  | -5.175350 | -0.191896 | 1.979866  |
| H  | -5.432687 | -1.803726 | -0.833636 |
| H  | -4.688808 | -0.331548 | -0.213686 |
| H  | -3.522251 | -1.339119 | -2.167449 |
| H  | -3.143160 | -2.764051 | -1.235620 |

|   |           |           |           |
|---|-----------|-----------|-----------|
| H | -1.828265 | -1.362205 | 0.389873  |
| H | 1.462081  | 0.232397  | -2.317075 |
| H | 3.462756  | 1.211181  | -1.179911 |
| O | -0.432749 | -1.258416 | -3.173735 |
| C | -4.664433 | -3.391837 | 1.128337  |
| H | -3.922802 | -3.906026 | 0.512490  |
| H | -4.531515 | -3.737662 | 2.158018  |
| H | -5.668832 | -3.713522 | 0.787959  |
| H | 4.153253  | 0.366497  | 1.051909  |

### **R-S-1-H-TSelim**

**Bond Energy -8.68675303 a.u.**

|    |           |           |           |
|----|-----------|-----------|-----------|
| C  | 3.314624  | -1.182595 | 1.104863  |
| C  | 2.882019  | 0.106629  | 0.791402  |
| C  | 1.877756  | 0.298722  | -0.156802 |
| C  | 1.306876  | -0.806589 | -0.796794 |
| C  | 1.743246  | -2.097559 | -0.495469 |
| C  | 2.742403  | -2.280048 | 0.459575  |
| H  | 3.081022  | -3.286619 | 0.694647  |
| H  | 1.304821  | -2.948379 | -1.007134 |
| Se | -0.016541 | -0.476017 | -2.181047 |
| C  | -2.412847 | 0.077905  | -0.785    |
| C  | -2.717887 | 1.348263  | -1.427593 |
| C  | -3.400601 | 1.462183  | -2.657820 |
| C  | -3.699449 | 2.706817  | -3.199493 |
| C  | -3.336881 | 3.879148  | -2.532225 |
| C  | -2.664376 | 3.789852  | -1.312051 |
| C  | -2.356375 | 2.546587  | -0.772853 |
| H  | -1.832002 | 2.490158  | 0.178318  |
| H  | -2.379591 | 4.693949  | -0.779105 |
| H  | -3.576363 | 4.849882  | -2.958379 |
| H  | -4.221917 | 2.764748  | -4.151435 |
| H  | -3.692212 | 0.569738  | -3.202302 |
| C  | -2.940986 | -1.199294 | -1.103654 |
| C  | -3.404253 | -2.134719 | 0.035181  |
| N  | -2.453157 | -2.342078 | 1.123334  |
| C  | -3.063679 | -2.289221 | 2.443126  |
| H  | -2.283448 | -2.352234 | 3.208793  |
| H  | -3.786438 | -3.107822 | 2.633618  |
| H  | -3.586725 | -1.337723 | 2.578206  |
| H  | -3.713180 | -3.091814 | -0.418345 |
| H  | -4.317033 | -1.696191 | 0.455134  |
| H  | -3.687001 | -1.200411 | -1.903339 |
| H  | -1.955958 | -1.749106 | -1.697093 |
| H  | -1.906364 | 0.156853  | 0.174631  |
| H  | 1.543078  | 1.307831  | -0.388167 |
| H  | 3.321776  | 0.967208  | 1.290104  |
| O  | -0.819782 | -1.982175 | -2.388861 |
| C  | -1.648779 | -3.544341 | 0.951297  |

|   |           |           |           |
|---|-----------|-----------|-----------|
| H | -0.849101 | -3.565529 | 1.698073  |
| H | -2.241581 | -4.474552 | 1.057482  |
| H | -1.187223 | -3.547157 | -0.036014 |
| H | 4.095551  | -1.330643 | 1.846221  |

### **R-R-1-H-TSelim**

**Bond Energy -8.68849359 a.u.**

|    |           |           |           |
|----|-----------|-----------|-----------|
| C  | 3.244808  | 0.445902  | -0.321525 |
| C  | 2.663557  | -0.370961 | -1.292452 |
| C  | 1.501744  | -1.088771 | -1.010783 |
| C  | 0.919556  | -0.982327 | 0.253081  |
| C  | 1.495352  | -0.166678 | 1.232292  |
| C  | 2.657778  | 0.544869  | 0.940890  |
| H  | 3.103662  | 1.179883  | 1.702779  |
| H  | 1.045874  | -0.080326 | 2.219429  |
| Se | -0.659797 | -2.003576 | 0.721831  |
| C  | -2.802260 | -0.299876 | -0.193698 |
| C  | -2.222905 | 1.028016  | -0.105279 |
| C  | -1.544922 | 1.662941  | -1.168610 |
| C  | -1.070330 | 2.962709  | -1.041920 |
| C  | -1.257338 | 3.675736  | 0.143979  |
| C  | -1.923584 | 3.067456  | 1.210033  |
| C  | -2.392524 | 1.765794  | 1.088489  |
| H  | -2.909871 | 1.301735  | 1.925109  |
| H  | -2.078032 | 3.611991  | 2.138524  |
| H  | -0.887685 | 4.693703  | 0.236213  |
| H  | -0.549354 | 3.426173  | -1.876270 |
| H  | -1.384748 | 1.135166  | -2.102816 |
| C  | -2.962630 | -1.108572 | -1.351038 |
| C  | -4.301830 | -1.856698 | -1.553913 |
| N  | -4.811421 | -2.577455 | -0.389945 |
| C  | -6.251979 | -2.449656 | -0.225178 |
| H  | -6.556318 | -2.929758 | 0.710658  |
| H  | -6.837172 | -2.913583 | -1.044207 |
| H  | -6.532313 | -1.393639 | -0.164818 |
| H  | -4.191839 | -2.522039 | -2.427786 |
| H  | -5.046078 | -1.104801 | -1.840060 |
| H  | -2.655288 | -0.639897 | -2.289775 |
| H  | -2.083601 | -1.986612 | -1.196110 |
| H  | -3.370599 | -0.611804 | 0.679598  |
| H  | 1.051008  | -1.735526 | -1.757322 |
| H  | 3.119584  | -0.455796 | -2.276330 |
| O  | -1.070259 | -2.803370 | -0.739917 |
| C  | -4.389305 | -3.972711 | -0.344295 |
| H  | -4.678618 | -4.412431 | 0.615881  |
| H  | -4.844763 | -4.584095 | -1.148217 |
| H  | -3.305546 | -4.043289 | -0.435604 |
| H  | 4.152162  | 1.670     | -0.545875 |

**R-S-1-H-PCelim****Bond Energy -8.73004929 a.u.**

|    |           |           |           |
|----|-----------|-----------|-----------|
| C  | 3.380181  | -1.371575 | 0.723709  |
| C  | 3.997114  | -0.223444 | 0.224948  |
| C  | 3.530991  | 0.377059  | -0.943329 |
| C  | 2.449748  | -0.186670 | -1.631964 |
| C  | 1.831330  | -1.339506 | -1.141981 |
| C  | 2.295816  | -1.919746 | 0.038383  |
| H  | 1.807765  | -2.814488 | 0.418317  |
| H  | 0.996127  | -1.778866 | -1.677416 |
| Se | 1.915252  | 0.656903  | -3.281210 |
| C  | -3.386925 | -0.092477 | -0.131473 |
| C  | -3.146211 | 1.051395  | -1.019541 |
| C  | -3.326790 | 1.018379  | -2.416622 |
| C  | -3.086889 | 2.142850  | -3.199915 |
| C  | -2.656005 | 3.337140  | -2.616302 |
| C  | -2.465459 | 3.389122  | -1.236631 |
| C  | -2.705067 | 2.262394  | -0.453593 |
| H  | -2.551618 | 2.316752  | 0.621671  |
| H  | -2.127011 | 4.309385  | -0.766616 |
| H  | -2.468738 | 4.212912  | -3.232134 |
| H  | -3.235701 | 2.087722  | -4.275844 |
| H  | -3.655651 | 0.104504  | -2.902203 |
| C  | -3.908055 | -1.286834 | -0.449882 |
| C  | -4.173044 | -2.424635 | 0.502002  |
| N  | -3.486810 | -2.355752 | 1.786439  |
| C  | -4.173718 | -3.112489 | 2.822645  |
| H  | -3.659092 | -2.973211 | 3.778571  |
| H  | -4.219830 | -4.201467 | 2.621281  |
| H  | -5.197874 | -2.744595 | 2.937057  |
| H  | -3.963091 | -3.378668 | -0.026569 |
| H  | -5.255231 | -2.444748 | 0.696472  |
| H  | -4.221209 | -1.495918 | -1.472153 |
| H  | -0.355353 | 0.446631  | -3.127504 |
| H  | -3.113208 | 0.068380  | 0.909501  |
| H  | 4.008229  | 1.285079  | -1.306113 |
| H  | 4.838672  | 0.218867  | 0.752941  |
| O  | 0.291691  | -0.124314 | -3.569226 |
| C  | -2.083092 | -2.736323 | 1.688973  |
| H  | -1.585910 | -2.558228 | 2.647547  |
| H  | -1.943463 | -3.803336 | 1.424467  |
| H  | -1.580389 | -2.131732 | 0.932028  |
| H  | 3.739915  | -1.832093 | 1.639922  |

**R-R-1-H-PCelim****Bond Energy -8.72993513 a.u.**

|    |           |           |           |
|----|-----------|-----------|-----------|
| C  | 4.845889  | 0.325141  | -0.199881 |
| C  | 3.768421  | -0.022365 | -1.014586 |
| C  | 2.614990  | -0.586932 | -0.469546 |
| C  | 2.535185  | -0.791668 | 0.909742  |
| C  | 3.608541  | -0.436721 | 1.736158  |
| C  | 4.761195  | 0.111742  | 1.176743  |
| H  | 5.591349  | 0.383192  | 1.824680  |
| H  | 3.551546  | -0.577973 | 2.813589  |
| Se | 1.002112  | -1.603600 | 1.752153  |
| C  | -4.183677 | -0.084548 | -0.588631 |
| C  | -3.215145 | 1.013170  | -0.479892 |
| C  | -2.671911 | 1.699909  | -1.583511 |
| C  | -1.757762 | 2.732848  | -1.409093 |
| C  | -1.350147 | 3.114277  | -0.128339 |
| C  | -1.871202 | 2.445492  | 0.977809  |
| C  | -2.788012 | 1.410690  | 0.802093  |
| H  | -3.192007 | 0.901026  | 1.674110  |
| H  | -1.563868 | 2.728213  | 1.981779  |
| H  | -0.632262 | 3.919654  | 0.002706  |
| H  | -1.354022 | 3.243437  | -2.280312 |
| H  | -2.959253 | 1.421396  | -2.592740 |
| C  | -4.786299 | -0.544871 | -1.694988 |
| C  | -5.797252 | -1.660825 | -1.756388 |
| N  | -5.848969 | -2.538259 | -0.593425 |
| C  | -7.141131 | -3.192602 | -0.450804 |
| H  | -7.151276 | -3.783867 | 0.470229  |
| H  | -7.389838 | -3.873276 | -1.289514 |
| H  | -7.933976 | -2.442118 | -0.375792 |
| H  | -5.631845 | -2.230315 | -2.695468 |
| H  | -6.788425 | -1.200373 | -1.878932 |
| H  | -4.588784 | -0.083798 | -2.662034 |
| H  | -0.665549 | -0.712158 | 0.468849  |
| H  | -4.436539 | -0.570517 | 0.351766  |
| H  | 1.785663  | -0.865709 | -1.111130 |
| H  | 3.823486  | 0.139165  | -2.088824 |
| O  | -0.211310 | -1.565218 | 0.391681  |
| C  | -4.756591 | -3.504461 | -0.575613 |
| H  | -4.771543 | -4.059081 | 0.367655  |
| H  | -4.817331 | -4.237559 | -1.403878 |
| H  | -3.795833 | -2.991630 | -0.648639 |
| H  | 5.742715  | 0.760666  | -0.632231 |

**Compound 6**

27

**C11NH15**

|   |           |          |           |
|---|-----------|----------|-----------|
| C | -3.237979 | 0.472901 | -0.478519 |
| C | -3.500629 | 1.588371 | -1.396151 |
| C | -3.910706 | 1.428481 | -2.733899 |
| C | -4.150628 | 2.529235 | -3.548821 |



|   |           |           |           |
|---|-----------|-----------|-----------|
| C | -3.986012 | 3.826626  | -3.057485 |
| C | -3.573275 | 4.007001  | -1.738467 |
| C | -3.331979 | 2.903378  | -0.923758 |
| H | -3.010104 | 3.057666  | 0.103676  |
| H | -3.436367 | 5.010096  | -1.341391 |
| H | -4.172799 | 4.684397  | -3.698538 |
| H | -4.464127 | 2.375387  | -4.578852 |
| H | -4.035446 | 0.433107  | -3.149476 |
| C | -3.482081 | -0.831183 | -0.676757 |
| C | -3.232615 | -1.943302 | 0.309608  |
| N | -2.316610 | -1.634095 | 1.401410  |
| C | -2.538242 | -2.477983 | 2.566124  |
| H | -1.874899 | -2.162509 | 3.377660  |
| H | -2.350496 | -3.554119 | 2.377868  |
| H | -3.569571 | -2.369301 | 2.915303  |
| H | -2.911566 | -2.845406 | -0.253195 |
| H | -4.202433 | -2.217736 | 0.749496  |
| H | -3.940843 | -1.169229 | -1.605254 |
| H | -2.804691 | 0.756757  | 0.478832  |
| C | -0.921173 | -1.660821 | 0.981266  |
| H | -0.283450 | -1.310360 | 1.798798  |
| H | -0.577835 | -2.673308 | 0.690273  |
| H | -0.772041 | -0.995949 | 0.128278  |

### Compound 8

#### Bond Energy -3.00447930 a.u.

|    |           |           |           |
|----|-----------|-----------|-----------|
| Se | -0.229018 | 1.753446  | 0.064112  |
| C  | -1.666618 | 0.470224  | 0.042457  |
| C  | -2.974497 | 0.948980  | -0.100560 |
| C  | -4.038711 | 0.051509  | -0.198858 |
| C  | -3.808511 | -1.320855 | -0.116205 |
| C  | -2.505574 | -1.796860 | 0.047901  |
| C  | -1.434347 | -0.908971 | 0.108841  |
| H  | -3.162713 | 2.018903  | -0.122957 |
| H  | -5.051255 | 0.430170  | -0.316024 |
| H  | -4.639913 | -2.018545 | -0.175312 |
| H  | -2.320356 | -2.866534 | 0.111672  |
| H  | -0.422480 | -1.290547 | 0.208833  |
| O  | 0.664358  | 1.259933  | 1.594612  |
| H  | 1.391704  | 0.698247  | 1.292068  |

### 1-CF<sub>3</sub>

#### Bond Energy -9.14466765 a.u.

|   |          |           |           |
|---|----------|-----------|-----------|
| C | 3.342526 | -0.137005 | 0.519233  |
| C | 3.065777 | 0.288526  | -0.780358 |

|    |           |           |           |
|----|-----------|-----------|-----------|
| C  | 1.921248  | -0.163297 | -1.435774 |
| C  | 1.051010  | -1.059060 | -0.807931 |
| C  | 1.344182  | -1.498541 | 0.488841  |
| C  | 2.475356  | -1.034412 | 1.151419  |
| H  | 2.686277  | -1.380289 | 2.158725  |
| H  | 0.693720  | -2.214272 | 0.982224  |
| Se | -0.477926 | -1.735523 | -1.773181 |
| C  | -1.990935 | -0.955886 | -0.674016 |
| C  | -2.028865 | 0.549454  | -0.736201 |
| C  | -2.327376 | 1.247337  | -1.916718 |
| C  | -2.377580 | 2.638042  | -1.935018 |
| C  | -2.123770 | 3.369061  | -0.772673 |
| C  | -1.819234 | 2.691960  | 0.405799  |
| C  | -1.773271 | 1.297713  | 0.421121  |
| H  | -1.540448 | 0.782781  | 1.349741  |
| H  | -1.615650 | 3.247317  | 1.318248  |
| H  | -2.159920 | 4.455418  | -0.789007 |
| H  | -2.610811 | 3.155355  | -2.862727 |
| H  | -2.505622 | 0.701526  | -2.838764 |
| C  | -3.266051 | -1.675988 | -1.142473 |
| C  | -4.488443 | -1.438098 | -0.239433 |
| N  | -4.342172 | -1.933358 | 1.129427  |
| C  | -5.281370 | -1.292271 | 2.040034  |
| H  | -5.089668 | -1.629957 | 3.063472  |
| H  | -6.342503 | -1.510339 | 1.806920  |
| H  | -5.145167 | -0.207298 | 2.012896  |
| H  | -5.371919 | -1.881935 | -0.740854 |
| H  | -4.676138 | -0.362392 | -0.182374 |
| H  | -3.539005 | -1.350719 | -2.151677 |
| H  | -3.061588 | -2.748132 | -1.217774 |
| H  | -1.774119 | -1.269057 | 0.346885  |
| H  | 1.702361  | 0.191625  | -2.437912 |
| H  | 3.730116  | 0.984663  | -1.281433 |
| C  | -4.423061 | -3.384370 | 1.228713  |
| H  | -4.248008 | -3.690107 | 2.264651  |
| H  | -5.406903 | -3.787825 | 0.916417  |
| H  | -3.655130 | -3.859208 | 0.613961  |
| C  | 4.593696  | 0.318990  | 1.236074  |
| F  | 4.362222  | 0.582090  | 2.550596  |
| F  | 5.568190  | -0.636266 | 1.198462  |
| F  | 5.127344  | 1.442445  | 0.695220  |

### R-S-1-CF<sub>3</sub>-RCox

#### Bond Energy -9.80232087 a.u.

|   |          |           |           |
|---|----------|-----------|-----------|
| C | 3.412620 | 0.045227  | 0.357916  |
| C | 3.081145 | 0.664891  | -0.847256 |
| C | 1.960364 | 0.246481  | -1.562927 |
| C | 1.170800 | -0.804452 | -1.089066 |

|    |           |           |           |
|----|-----------|-----------|-----------|
| C  | 1.515528  | -1.435665 | 0.111708  |
| C  | 2.624764  | -1.007644 | 0.834087  |
| H  | 2.878757  | -1.501752 | 1.766861  |
| H  | 0.927465  | -2.268665 | 0.483249  |
| Se | -0.333798 | -1.404300 | -2.144696 |
| C  | -1.883228 | -0.837911 | -0.958418 |
| C  | -1.945946 | 0.657967  | -0.792193 |
| C  | -2.257073 | 1.521871  | -1.853578 |
| C  | -2.331845 | 2.898065  | -1.659429 |
| C  | -2.091694 | 3.446931  | -0.398286 |
| C  | -1.775484 | 2.603521  | 0.664249  |
| C  | -1.703825 | 1.224560  | 0.466746  |
| H  | -1.463529 | 0.577639  | 1.306547  |
| H  | -1.583580 | 3.016567  | 1.651601  |
| H  | -2.148250 | 4.522133  | -0.248453 |
| H  | -2.575037 | 3.546830  | -2.497581 |
| H  | -2.428703 | 1.120341  | -2.848150 |
| C  | -3.135635 | -1.502129 | -1.552326 |
| C  | -4.377342 | -1.412257 | -0.647180 |
| N  | -4.240295 | -2.081825 | 0.644878  |
| C  | -5.209892 | -1.588686 | 1.613667  |
| H  | -5.025743 | -2.054940 | 2.586650  |
| H  | -6.261300 | -1.799101 | 1.333710  |
| H  | -5.101844 | -0.506609 | 1.733258  |
| H  | -5.240398 | -1.804172 | -1.222301 |
| H  | -4.591633 | -0.357824 | -0.452225 |
| H  | -3.396398 | -1.039337 | -2.509707 |
| H  | -2.916043 | -2.550353 | -1.772893 |
| H  | -1.667409 | -1.301284 | 0.003824  |
| H  | 1.698626  | 0.747194  | -2.489647 |
| H  | 3.684223  | 1.482904  | -1.226775 |
| O  | -0.046352 | -5.164540 | -0.127780 |
| O  | -0.607605 | -4.961682 | -1.461703 |
| H  | -0.398174 | -4.015718 | -1.603506 |
| H  | 0.716918  | -5.722279 | -0.348848 |
| C  | -4.285491 | -3.536248 | 0.549857  |
| H  | -4.120631 | -3.970601 | 1.540278  |
| H  | -5.254817 | -3.914329 | 0.168762  |
| H  | -3.495404 | -3.911193 | -0.103032 |
| C  | 4.643208  | 0.463554  | 1.132859  |
| F  | 4.420651  | 0.478469  | 2.474156  |
| F  | 5.681673  | -0.396123 | 0.920932  |
| F  | 5.082391  | 1.699640  | 0.789519  |

**R-R-1-CF<sub>3</sub>-RCox**

**Bond Energy -9.80146839 a.u.**

|   |          |           |           |
|---|----------|-----------|-----------|
| C | 3.382708 | -0.016477 | 0.718446  |
| C | 2.997713 | 0.540609  | -0.501391 |
| C | 1.895102 | 0.031967  | -1.186607 |

|    |           |           |           |
|----|-----------|-----------|-----------|
| C  | 1.174195  | -1.044199 | -0.662780 |
| C  | 1.571799  | -1.609141 | 0.554585  |
| C  | 2.665676  | -1.095814 | 1.244165  |
| H  | 2.961325  | -1.541009 | 2.189144  |
| H  | 1.030522  | -2.456969 | 0.963336  |
| Se | -0.311248 | -1.803118 | -1.640480 |
| C  | -1.886304 | -0.984787 | -0.645299 |
| C  | -1.901547 | 0.519699  | -0.694433 |
| C  | -2.169876 | 1.236207  | -1.871138 |
| C  | -2.200783 | 2.627848  | -1.869579 |
| C  | -1.961401 | 3.338914  | -0.692284 |
| C  | -1.688678 | 2.642364  | 0.482970  |
| C  | -1.658627 | 1.248092  | 0.478776  |
| H  | -1.450189 | 0.716962  | 1.404191  |
| H  | -1.497713 | 3.182443  | 1.407198  |
| H  | -1.984244 | 4.425776  | -0.694021 |
| H  | -2.407614 | 3.159683  | -2.795061 |
| H  | -2.342172 | 0.711055  | -2.805318 |
| C  | -3.133399 | -1.692537 | -1.197690 |
| C  | -4.404682 | -1.454702 | -0.363902 |
| N  | -4.341165 | -1.965151 | 1.005501  |
| C  | -5.320811 | -1.320239 | 1.869963  |
| H  | -5.190063 | -1.670719 | 2.898653  |
| H  | -6.370127 | -1.521503 | 1.576553  |
| H  | -5.168977 | -0.237073 | 1.862009  |
| H  | -5.260024 | -1.886506 | -0.921128 |
| H  | -4.587393 | -0.378249 | -0.307148 |
| H  | -3.343679 | -1.356296 | -2.217721 |
| H  | -2.933251 | -2.766015 | -1.269538 |
| H  | -1.728774 | -1.310404 | 0.382909  |
| H  | 1.597961  | 0.483188  | -2.127414 |
| H  | 3.547263  | 1.377483  | -0.919064 |
| O  | -1.400297 | -0.469132 | -5.535965 |
| O  | -0.029622 | -0.429672 | -5.031144 |
| H  | -0.162674 | -0.784858 | -4.129590 |
| H  | -1.321840 | -1.189613 | -6.181806 |
| C  | -4.446567 | -3.415842 | 1.084572  |
| H  | -4.332649 | -3.734466 | 2.125113  |
| H  | -5.416960 | -3.802443 | 0.714409  |
| H  | -3.652349 | -3.895164 | 0.507742  |
| C  | 4.598171  | 0.499223  | 1.458741  |
| F  | 4.389410  | 0.557600  | 2.801437  |
| F  | 5.678286  | -0.312148 | 1.268374  |
| F  | 4.965748  | 1.741469  | 1.059880  |

**R-S-1-CF<sub>3</sub>-TSox**

**Bond Energy -9.77103164 a.u.**

|   |          |          |           |
|---|----------|----------|-----------|
| C | 3.377339 | 0.025944 | 0.485679  |
| C | 2.978328 | 0.746370 | -0.641645 |

|    |           |           |           |
|----|-----------|-----------|-----------|
| C  | 1.886255  | 0.317405  | -1.392806 |
| C  | 1.193545  | -0.832879 | -1.010473 |
| C  | 1.593726  | -1.566423 | 0.107891  |
| C  | 2.682324  | -1.128662 | 0.857066  |
| H  | 2.995373  | -1.701045 | 1.724348  |
| H  | 1.075083  | -2.482153 | 0.372249  |
| Se | -0.287266 | -1.439377 | -2.103488 |
| C  | -1.862609 | -0.888690 | -0.947611 |
| C  | -1.922414 | 0.610241  | -0.823808 |
| C  | -2.264556 | 1.440237  | -1.902918 |
| C  | -2.333576 | 2.822194  | -1.748790 |
| C  | -2.062247 | 3.406802  | -0.510769 |
| C  | -1.719592 | 2.595837  | 0.569287  |
| C  | -1.648351 | 1.212405  | 0.412137  |
| H  | -1.387318 | 0.590434  | 1.264061  |
| H  | -1.506624 | 3.038593  | 1.539064  |
| H  | -2.117632 | 4.485728  | -0.390929 |
| H  | -2.600309 | 3.445532  | -2.598717 |
| H  | -2.473701 | 1.009637  | -2.878166 |
| C  | -3.104628 | -1.584274 | -1.520231 |
| C  | -4.339842 | -1.473438 | -0.606429 |
| N  | -4.162142 | -2.023809 | 0.734001  |
| C  | -5.187045 | -1.540494 | 1.649774  |
| H  | -4.978369 | -1.907077 | 2.659446  |
| H  | -6.211014 | -1.865324 | 1.378393  |
| H  | -5.176481 | -0.446735 | 1.679837  |
| H  | -5.186097 | -1.950947 | -1.141263 |
| H  | -4.602052 | -0.417300 | -0.495921 |
| H  | -3.379184 | -1.152243 | -2.488168 |
| H  | -2.867351 | -2.633760 | -1.702466 |
| H  | -1.612191 | -1.337586 | 0.013310  |
| H  | 1.580629  | 0.884195  | -2.266842 |
| H  | 3.515280  | 1.640507  | -0.940126 |
| O  | -0.183359 | -5.351318 | -0.834970 |
| O  | -0.419906 | -3.417408 | -1.365613 |
| H  | 0.204235  | -3.946923 | -1.896655 |
| H  | -1.058577 | -5.625928 | -1.146344 |
| C  | -4.073297 | -3.480118 | 0.759609  |
| H  | -3.914118 | -3.813943 | 1.788801  |
| H  | -4.988225 | -3.974983 | 0.378587  |
| H  | -3.222551 | -3.830268 | 0.173129  |
| C  | 4.529845  | 0.519694  | 1.336578  |
| F  | 4.084621  | 1.309966  | 2.355915  |
| F  | 5.222772  | -0.498158 | 1.904166  |
| F  | 5.416821  | 1.260452  | 0.625901  |

***R-R-1-CF<sub>3</sub>-TSox***

**Bond Energy -9.76884926 a.u.**

|   |          |          |          |
|---|----------|----------|----------|
| C | 3.368883 | 0.121459 | 0.489617 |
|---|----------|----------|----------|

|    |           |           |           |
|----|-----------|-----------|-----------|
| C  | 2.868447  | 0.533036  | -0.746989 |
| C  | 1.750244  | -0.090859 | -1.296245 |
| C  | 1.132874  | -1.130322 | -0.601628 |
| C  | 1.636489  | -1.556957 | 0.630431  |
| C  | 2.753063  | -0.929145 | 1.175153  |
| H  | 3.139691  | -1.260511 | 2.133502  |
| H  | 1.167103  | -2.375676 | 1.167957  |
| Se | -0.382575 | -2.061225 | -1.364271 |
| C  | -1.977056 | -1.064535 | -0.551175 |
| C  | -1.855298 | 0.431324  | -0.566542 |
| C  | -2.027425 | 1.198626  | -1.730377 |
| C  | -1.950012 | 2.588231  | -1.676778 |
| C  | -1.701396 | 3.240833  | -0.468933 |
| C  | -1.524281 | 2.490458  | 0.692423  |
| C  | -1.598127 | 1.100318  | 0.640537  |
| H  | -1.467009 | 0.526139  | 1.554583  |
| H  | -1.330222 | 2.985582  | 1.640693  |
| H  | -1.645023 | 4.325993  | -0.433688 |
| H  | -2.081918 | 3.163581  | -2.589749 |
| H  | -2.193475 | 0.716388  | -2.686753 |
| C  | -3.205165 | -1.674453 | -1.239499 |
| C  | -4.522820 | -1.372607 | -0.503981 |
| N  | -4.605620 | -1.928367 | 0.847194  |
| C  | -5.587200 | -1.225506 | 1.664388  |
| H  | -5.563732 | -1.619141 | 2.685417  |
| H  | -6.624822 | -1.322830 | 1.289631  |
| H  | -5.341368 | -0.160691 | 1.708672  |
| H  | -5.353319 | -1.726715 | -1.145244 |
| H  | -4.636146 | -0.288267 | -0.425702 |
| H  | -3.289802 | -1.300629 | -2.262301 |
| H  | -3.076213 | -2.758835 | -1.325401 |
| H  | -1.934880 | -1.421656 | 0.479781  |
| H  | 1.363611  | 0.222398  | -2.259105 |
| H  | 3.344738  | 1.344498  | -1.287088 |
| O  | -0.824501 | -0.688679 | -5.203044 |
| O  | -0.525662 | -1.147599 | -3.262650 |
| H  | -0.456441 | -1.886622 | -3.895845 |
| H  | -0.008    | -0.174188 | -5.285768 |
| C  | -4.846089 | -3.365710 | 0.862402  |
| H  | -4.061439 | -3.897327 | 0.318879  |
| H  | -4.831749 | -3.728248 | 1.894626  |
| H  | -5.819229 | -3.648343 | 0.415105  |
| C  | 4.611609  | 0.766350  | 1.069694  |
| F  | 4.556631  | 0.851275  | 2.424336  |
| F  | 5.728754  | 0.046141  | 0.766867  |
| F  | 4.812259  | 2.021101  | 0.599109  |

***R-S-1-CF<sub>3</sub>-PCox***

**Bond Energy -9.86519385 a.u.**

|    |           |           |           |
|----|-----------|-----------|-----------|
| C  | 3.322806  | -0.192062 | 0.590137  |
| C  | 2.822109  | 0.761850  | -0.299363 |
| C  | 1.739214  | 0.449325  | -1.118236 |
| C  | 1.158976  | -0.815360 | -1.038147 |
| C  | 1.661870  | -1.779474 | -0.169329 |
| C  | 2.744771  | -1.463310 | 0.648266  |
| H  | 3.134364  | -2.211162 | 1.331336  |
| H  | 1.224063  | -2.771772 | -0.133028 |
| Se | -0.323139 | -1.280612 | -2.265989 |
| C  | -1.890659 | -0.768340 | -0.988490 |
| C  | -1.984861 | 0.725407  | -0.913860 |
| C  | -2.384576 | 1.507100  | -2.011512 |
| C  | -2.466641 | 2.894307  | -1.913654 |
| C  | -2.154701 | 3.535400  | -0.714635 |
| C  | -1.755682 | 2.774919  | 0.383959  |
| C  | -1.667604 | 1.388331  | 0.282539  |
| H  | -1.359780 | 0.807434  | 1.147928  |
| H  | -1.512648 | 3.261711  | 1.325287  |
| H  | -2.223610 | 4.617435  | -0.637535 |
| H  | -2.778057 | 3.476381  | -2.777608 |
| H  | -2.636743 | 1.033582  | -2.956324 |
| C  | -3.118019 | -1.531832 | -1.487951 |
| C  | -4.316373 | -1.475464 | -0.520336 |
| N  | -4.063541 | -2.035068 | 0.804670  |
| C  | -5.027553 | -1.553604 | 1.784740  |
| H  | -4.760988 | -1.931287 | 2.776730  |
| H  | -6.068683 | -1.869380 | 1.573523  |
| H  | -5.007637 | -0.460278 | 1.824498  |
| H  | -5.170447 | -1.974565 | -1.021560 |
| H  | -4.607432 | -0.429477 | -0.386724 |
| H  | -3.462202 | -1.130887 | -2.447652 |
| H  | -2.832782 | -2.569742 | -1.676125 |
| H  | -1.565356 | -1.181145 | -0.033098 |
| H  | 1.360546  | 1.197554  | -1.809144 |
| H  | 3.272068  | 1.747685  | -0.356492 |
| O  | -0.427624 | -5.152205 | -0.360162 |
| O  | -0.332122 | -2.942607 | -2.305119 |
| H  | -0.406053 | -4.464778 | -1.049836 |
| H  | -0.158363 | -5.955362 | -0.820851 |
| C  | -3.987149 | -3.492088 | 0.812629  |
| H  | -3.748102 | -3.837043 | 1.822690  |
| H  | -4.935563 | -3.973858 | 0.502762  |
| H  | -3.192639 | -3.848369 | 0.155952  |
| C  | 4.531950  | 0.134531  | 1.442     |
| F  | 4.576257  | 1.447059  | 1.789008  |
| F  | 4.562316  | -0.582458 | 2.592774  |
| F  | 5.693049  | -0.134650 | 0.779154  |

**Bond Energy -9.86390092 a.u.**

|    |           |           |           |
|----|-----------|-----------|-----------|
| C  | 3.275175  | -0.018661 | 1.043791  |
| C  | 3.011754  | 0.512424  | -0.220718 |
| C  | 1.969859  | 0.126     | -0.991723 |
| C  | 1.196430  | -1.038716 | -0.488765 |
| C  | 1.461648  | -1.590786 | 0.763658  |
| C  | 2.501253  | -1.075968 | 1.533135  |
| H  | 2.707840  | -1.499067 | 2.511096  |
| H  | 0.872712  | -2.419403 | 1.150559  |
| Se | -0.217833 | -1.808329 | -1.628770 |
| C  | -1.868422 | -0.924077 | -0.699282 |
| C  | -1.806275 | 0.568270  | -0.695398 |
| C  | -2.038283 | 1.332657  | -1.851573 |
| C  | -1.983762 | 2.724184  | -1.805833 |
| C  | -1.701397 | 3.384432  | -0.610550 |
| C  | -1.467850 | 2.638925  | 0.545     |
| C  | -1.515657 | 1.248331  | 0.499509  |
| H  | -1.337532 | 0.682     | 1.408976  |
| H  | -1.249944 | 3.140324  | 1.484876  |
| H  | -1.665247 | 4.470528  | -0.578861 |
| H  | -2.163507 | 3.295110  | -2.713527 |
| H  | -2.253204 | 0.846913  | -2.796132 |
| C  | -3.093541 | -1.582295 | -1.343826 |
| C  | -4.390709 | -1.373902 | -0.541476 |
| N  | -4.382829 | -1.978329 | 0.791901  |
| C  | -5.350434 | -1.347800 | 1.681092  |
| H  | -5.260279 | -1.775660 | 2.684624  |
| H  | -6.400809 | -1.476153 | 1.353635  |
| H  | -5.146804 | -0.275601 | 1.753148  |
| H  | -5.232935 | -1.748581 | -1.155087 |
| H  | -4.553376 | -0.299805 | -0.419224 |
| H  | -3.258334 | -1.192244 | -2.350979 |
| H  | -2.911324 | -2.655331 | -1.469238 |
| H  | -1.743110 | -1.311769 | 0.315793  |
| H  | 1.756163  | 0.398399  | -1.979239 |
| H  | 3.613376  | 1.328766  | -0.606478 |
| O  | -2.116952 | -1.171191 | -5.156188 |
| O  | -0.003157 | -1.033262 | -3.083856 |
| H  | -1.347492 | -1.160618 | -4.559194 |
| H  | -1.732133 | -1.149641 | -6.039744 |
| C  | -4.563139 | -3.423991 | 0.765012  |
| H  | -3.788539 | -3.901148 | 0.159893  |
| H  | -4.478323 | -3.823072 | 1.780384  |
| H  | -5.546601 | -3.732060 | 0.358641  |
| C  | 4.431786  | 0.500106  | 1.872666  |
| F  | 4.812653  | 1.749469  | 1.511172  |
| F  | 5.529679  | -0.299444 | 1.748181  |
| F  | 4.130176  | 0.542781  | 3.197533  |

**R-R-1-CF<sub>3</sub>-PCox**

**R-S-1-CF<sub>3</sub>-Ox****Bond Energy -9.34293670 a.u.**

|    |           |           |           |
|----|-----------|-----------|-----------|
| C  | 3.232578  | -0.334087 | 0.730452  |
| C  | 2.731702  | 0.564419  | -0.215156 |
| C  | 1.628825  | 0.216070  | -0.992783 |
| C  | 1.025762  | -1.026452 | -0.809545 |
| C  | 1.526687  | -1.934492 | 0.117571  |
| C  | 2.628068  | -1.584139 | 0.894691  |
| H  | 3.020     | -2.289531 | 1.620535  |
| H  | 1.062432  | -2.912445 | 0.213789  |
| Se | -0.488500 | -1.605741 | -1.953876 |
| C  | -2.012846 | -0.783531 | -0.776778 |
| C  | -2.075266 | 0.697443  | -0.985790 |
| C  | -2.476205 | 1.266461  | -2.207315 |
| C  | -2.527923 | 2.648346  | -2.374305 |
| C  | -2.183781 | 3.498669  | -1.323110 |
| C  | -1.782661 | 2.951633  | -0.104863 |
| C  | -1.724961 | 1.569147  | 0.058300  |
| H  | -1.413446 | 1.156531  | 1.014347  |
| H  | -1.514314 | 3.602626  | 0.723676  |
| H  | -2.229022 | 4.576926  | -1.452829 |
| H  | -2.840180 | 3.062636  | -3.329898 |
| H  | -2.751107 | 0.627846  | -3.042283 |
| C  | -3.267867 | -1.597901 | -1.089640 |
| C  | -4.385636 | -1.430558 | -0.042979 |
| N  | -4.025899 | -1.860073 | 1.306946  |
| C  | -4.919160 | -1.295280 | 2.309119  |
| H  | -4.572544 | -1.574387 | 3.309112  |
| H  | -5.968741 | -1.636571 | 2.209330  |
| H  | -4.911809 | -0.203097 | 2.243459  |
| H  | -5.279417 | -1.968257 | -0.419213 |
| H  | -4.662672 | -0.373353 | 0.010907  |
| H  | -3.687040 | -1.310774 | -2.059767 |
| H  | -2.989045 | -2.651580 | -1.175775 |
| H  | -1.671613 | -1.016461 | 0.232378  |
| H  | 1.255254  | 0.918917  | -1.732282 |
| H  | 3.202911  | 1.531979  | -0.354063 |
| O  | -0.598129 | -3.234057 | -1.665317 |
| C  | -3.927181 | -3.308075 | 1.444612  |
| H  | -3.604821 | -3.555101 | 2.460580  |
| H  | -4.887655 | -3.827445 | 1.256476  |
| H  | -3.182644 | -3.713556 | 0.756896  |
| C  | 4.397522  | 0.065504  | 1.611150  |
| F  | 3.966153  | 0.661999  | 2.761056  |
| F  | 5.153069  | -0.998008 | 1.983961  |
| F  | 5.227722  | 0.950067  | 1.001991  |

**R-R-1-CF<sub>3</sub>-Ox****Bond Energy -9.34113692 a.u.**

|    |           |           |           |
|----|-----------|-----------|-----------|
| C  | 3.255626  | -0.028329 | 0.556660  |
| C  | 2.877727  | 0.422369  | -0.710171 |
| C  | 1.765071  | -0.127276 | -1.344708 |
| C  | 1.035164  | -1.121171 | -0.704688 |
| C  | 1.414585  | -1.593368 | 0.550927  |
| C  | 2.524860  | -1.042338 | 1.184771  |
| H  | 2.820253  | -1.403115 | 2.165011  |
| H  | 0.859889  | -2.388168 | 1.044981  |
| Se | -0.478598 | -1.952857 | -1.672416 |
| C  | -2.035442 | -1.019117 | -0.633782 |
| C  | -1.962099 | 0.471103  | -0.694772 |
| C  | -2.229278 | 1.186629  | -1.874467 |
| C  | -2.160421 | 2.578019  | -1.894628 |
| C  | -1.828412 | 3.287887  | -0.741240 |
| C  | -1.556754 | 2.591611  | 0.436492  |
| C  | -1.618513 | 1.200829  | 0.455765  |
| H  | -1.408261 | 0.671466  | 1.381778  |
| H  | -1.296995 | 3.132021  | 1.343565  |
| H  | -1.781057 | 4.373822  | -0.759664 |
| H  | -2.365554 | 3.110084  | -2.820455 |
| H  | -2.472222 | 0.656579  | -2.788233 |
| C  | -3.312934 | -1.682714 | -1.160258 |
| C  | -4.554457 | -1.413813 | -0.290476 |
| N  | -4.472987 | -1.955724 | 1.066440  |
| C  | -5.374286 | -1.268607 | 1.982731  |
| H  | -5.226873 | -1.650375 | 2.997981  |
| H  | -6.444906 | -1.395120 | 1.727827  |
| H  | -5.152137 | -0.197721 | 1.990799  |
| H  | -5.440551 | -1.800651 | -0.831563 |
| H  | -4.691690 | -0.332323 | -0.209074 |
| H  | -3.534331 | -1.332558 | -2.172502 |
| H  | -3.155883 | -2.763571 | -1.248435 |
| H  | -1.838848 | -1.369075 | 0.383330  |
| H  | 1.461969  | 0.206393  | -2.333204 |
| H  | 3.445829  | 1.204046  | -1.203644 |
| O  | -0.431405 | -1.267231 | -3.177670 |
| C  | -4.672239 | -3.397858 | 1.122     |
| H  | -3.940630 | -3.914974 | 0.494582  |
| H  | -4.531992 | -3.749472 | 2.146670  |
| H  | -5.682151 | -3.710033 | 0.787900  |
| C  | 4.487469  | 0.528809  | 1.238087  |
| F  | 4.309887  | 0.667367  | 2.579148  |
| F  | 5.563440  | -0.293172 | 1.071102  |
| F  | 4.844711  | 1.744743  | 0.757260  |

**R-S-1-CF<sub>3</sub>-TSelim****Bond Energy -9.31710873 a.u.**

|    |           |           |           |
|----|-----------|-----------|-----------|
| C  | 3.315421  | -1.165684 | 1.222681  |
| C  | 2.963789  | 0.130656  | 0.835280  |
| C  | 2.013861  | 0.327890  | -0.162328 |
| C  | 1.405890  | -0.771092 | -0.778255 |
| C  | 1.759583  | -2.066555 | -0.398883 |
| C  | 2.706623  | -2.260808 | 0.601322  |
| H  | 2.979402  | -3.271158 | 0.890090  |
| H  | 1.298726  | -2.916771 | -0.890384 |
| Se | 0.146007  | -0.439491 | -2.216197 |
| C  | -2.325587 | 0.044432  | -0.894899 |
| C  | -2.628404 | 1.324991  | -1.514685 |
| C  | -3.275535 | 1.459326  | -2.762242 |
| C  | -3.571588 | 2.712707  | -3.284235 |
| C  | -3.241796 | 3.872790  | -2.579413 |
| C  | -2.605747 | 3.763233  | -1.341401 |
| C  | -2.300193 | 2.511465  | -0.821384 |
| H  | -1.803664 | 2.438648  | 0.143500  |
| H  | -2.347444 | 4.657969  | -0.780143 |
| H  | -3.478673 | 4.850481  | -2.990765 |
| H  | -4.065789 | 2.787466  | -4.249889 |
| H  | -3.540658 | 0.576602  | -3.335254 |
| C  | -2.810382 | -1.235639 | -1.269997 |
| C  | -3.281556 | -2.222877 | -0.175922 |
| N  | -2.369512 | -2.415652 | 0.947617  |
| C  | -2.983597 | -2.198238 | 2.248781  |
| H  | -2.215123 | -2.238980 | 3.027638  |
| H  | -3.760969 | -2.945394 | 2.504503  |
| H  | -3.443419 | -1.206375 | 2.287718  |
| H  | -3.510654 | -3.179771 | -0.668358 |
| H  | -4.240436 | -1.847677 | 0.202549  |
| H  | -3.531151 | -1.228282 | -2.092721 |
| H  | -1.803632 | -1.748034 | -1.826496 |
| H  | -1.846155 | 0.105525  | 0.079768  |
| H  | 1.752433  | 1.343431  | -0.451522 |
| H  | 3.428934  | 0.988515  | 1.309887  |
| O  | -0.612217 | -1.955538 | -2.482681 |
| C  | -1.648008 | -3.679027 | 0.890263  |
| H  | -0.867827 | -3.695916 | 1.657574  |
| H  | -2.303049 | -4.557880 | 1.051284  |
| H  | -1.165900 | -3.789710 | -0.082141 |
| C  | 4.303208  | -1.386376 | 2.344641  |
| F  | 3.671373  | -1.518036 | 3.549582  |
| F  | 5.039789  | -2.514521 | 2.170559  |
| F  | 5.178462  | -0.356772 | 2.477911  |

### ***R-R-1-CF<sub>3</sub>-Tselim***

#### **Bond Energy -9.31910635 a.u.**

|   |          |           |           |
|---|----------|-----------|-----------|
| C | 3.208953 | 0.484273  | -0.297828 |
| C | 2.643742 | -0.350439 | -1.266007 |

|    |           |           |           |
|----|-----------|-----------|-----------|
| C  | 1.497251  | -1.085684 | -0.979296 |
| C  | 0.910249  | -0.990181 | 0.282820  |
| C  | 1.476081  | -0.163038 | 1.258533  |
| C  | 2.621602  | 0.569497  | 0.968827  |
| H  | 3.052028  | 1.213863  | 1.728804  |
| H  | 1.029192  | -0.079632 | 2.246622  |
| Se | -0.659697 | -2.025732 | 0.740443  |
| C  | -2.800524 | -0.296540 | -0.217902 |
| C  | -2.214716 | 1.027487  | -0.145642 |
| C  | -1.534766 | 1.645979  | -1.218064 |
| C  | -1.050268 | 2.943202  | -1.106142 |
| C  | -1.230021 | 3.669571  | 0.072973  |
| C  | -1.899526 | 3.078701  | 1.146876  |
| C  | -2.378048 | 1.779449  | 1.040659  |
| H  | -2.897485 | 1.328122  | 1.882869  |
| H  | -2.048387 | 3.635089  | 2.069100  |
| H  | -0.851894 | 4.685313  | 0.153694  |
| H  | -0.527787 | 3.394645  | -1.945964 |
| H  | -1.382206 | 1.107678  | -2.147528 |
| C  | -2.951392 | -1.127173 | -1.362567 |
| C  | -4.292636 | -1.877680 | -1.555276 |
| N  | -4.795841 | -2.587073 | -0.382591 |
| C  | -6.231937 | -2.438607 | -0.194943 |
| H  | -6.527098 | -2.908850 | 0.748700  |
| H  | -6.836397 | -2.899212 | -1.001344 |
| H  | -6.496945 | -1.378562 | -0.136458 |
| H  | -4.182275 | -2.551008 | -2.422270 |
| H  | -5.036997 | -1.128681 | -1.847799 |
| H  | -2.644460 | -0.670111 | -2.307272 |
| H  | -2.083493 | -1.995214 | -1.195682 |
| H  | -3.368863 | -0.597770 | 0.659237  |
| H  | 1.059850  | -1.738684 | -1.728052 |
| H  | 3.096421  | -0.428887 | -2.249275 |
| O  | -1.050504 | -2.825083 | -0.723896 |
| C  | -4.390034 | -3.987301 | -0.335916 |
| H  | -4.670512 | -4.418691 | 0.630540  |
| H  | -4.864208 | -4.596962 | -1.129892 |
| H  | -3.308472 | -4.071347 | -0.442145 |
| C  | 4.479412  | 1.248100  | -0.589468 |
| F  | 4.649636  | 1.489160  | -1.914950 |
| F  | 5.585505  | 0.563894  | -0.172556 |
| F  | 4.512396  | 2.453225  | 0.048     |

### ***R-S-1-CF<sub>3</sub>-PCelim***

#### **Bond Energy -9.36103445 a.u.**

|   |          |           |           |
|---|----------|-----------|-----------|
| C | 3.320044 | -1.135276 | 0.719499  |
| C | 4.082243 | -0.179213 | 0.039853  |
| C | 3.639278 | 0.341259  | -1.170047 |
| C | 2.427939 | -0.096522 | -1.721773 |

|    |           |           |           |
|----|-----------|-----------|-----------|
| C  | 1.667922  | -1.057572 | -1.051822 |
| C  | 2.115275  | -1.570448 | 0.162523  |
| H  | 1.515434  | -2.314796 | 0.676208  |
| H  | 0.732901  | -1.407213 | -1.475331 |
| Se | 1.902038  | 0.656488  | -3.410140 |
| C  | -3.344318 | -0.192135 | -0.099912 |
| C  | -3.037381 | 0.956885  | -0.960468 |
| C  | -3.240490 | 0.976954  | -2.354797 |
| C  | -2.932758 | 2.103926  | -3.110766 |
| C  | -2.409231 | 3.247875  | -2.501685 |
| C  | -2.197149 | 3.247050  | -1.124196 |
| C  | -2.505757 | 2.118209  | -0.368720 |
| H  | -2.335272 | 2.131792  | 0.705234  |
| H  | -1.789285 | 4.127832  | -0.634171 |
| H  | -2.171132 | 4.126270  | -3.095829 |
| H  | -3.105620 | 2.092113  | -4.184553 |
| H  | -3.644476 | 0.104589  | -2.859557 |
| C  | -3.915473 | -1.354583 | -0.449519 |
| C  | -4.248156 | -2.496330 | 0.476079  |
| N  | -3.584814 | -2.479934 | 1.773906  |
| C  | -4.327310 | -3.217533 | 2.785829  |
| H  | -3.824473 | -3.117552 | 3.752760  |
| H  | -4.422408 | -4.299626 | 2.566494  |
| H  | -5.334143 | -2.801333 | 2.887317  |
| H  | -4.070629 | -3.449141 | -0.066276 |
| H  | -5.333831 | -2.471296 | 0.649224  |
| H  | -4.221384 | -1.530220 | -1.480272 |
| H  | -0.372527 | 0.502785  | -3.263209 |
| H  | -3.077332 | -0.065698 | 0.947513  |
| H  | 4.242957  | 1.093238  | -1.673397 |
| H  | 5.020600  | 0.170741  | 0.458117  |
| O  | 0.271001  | -0.114294 | -3.645235 |
| C  | -2.199529 | -2.926838 | 1.696840  |
| H  | -1.712439 | -2.787638 | 2.666833  |
| H  | -2.105521 | -3.994692 | 1.417076  |
| H  | -1.655310 | -2.334899 | 0.958383  |
| C  | 3.826935  | -1.729508 | 2.011077  |
| F  | 4.547386  | -0.838311 | 2.742665  |
| F  | 2.820809  | -2.175482 | 2.808147  |
| F  | 4.647877  | -2.798949 | 1.788097  |

**R-R-1-CF<sub>3</sub>-PCelim**

**Bond Energy -9.36088410 a.u.**

|   |          |           |           |
|---|----------|-----------|-----------|
| C | 4.700939 | 0.273896  | -0.351356 |
| C | 3.509144 | -0.049297 | -1.004367 |
| C | 2.410591 | -0.515649 | -0.287663 |
| C | 2.494404 | -0.653425 | 1.099553  |
| C | 3.685512 | -0.326199 | 1.760767  |
| C | 4.780072 | 0.133056  | 1.038097  |
| H | 5.697470 | 0.381852  | 1.561904  |

|    |           |           |           |
|----|-----------|-----------|-----------|
| H  | 3.769832  | -0.423493 | 2.840914  |
| Se | 1.039481  | -1.309921 | 2.171221  |
| C  | -4.107861 | -0.102786 | -0.597323 |
| C  | -3.134061 | 0.981393  | -0.421557 |
| C  | -2.474435 | 1.630864  | -1.483539 |
| C  | -1.564075 | 2.654806  | -1.246629 |
| C  | -1.276180 | 3.064139  | 0.057763  |
| C  | -1.913213 | 2.432124  | 1.124244  |
| C  | -2.825859 | 1.405768  | 0.885995  |
| H  | -3.323664 | 0.927260  | 1.726700  |
| H  | -1.701731 | 2.738630  | 2.145888  |
| H  | -0.561771 | 3.863065  | 0.237785  |
| H  | -1.069517 | 3.136780  | -2.086742 |
| H  | -2.667132 | 1.329751  | -2.508673 |
| C  | -4.626388 | -0.565466 | -1.744589 |
| C  | -5.647942 | -1.665431 | -1.876196 |
| N  | -5.807569 | -2.528085 | -0.712085 |
| C  | -7.118432 | -3.159230 | -0.665973 |
| H  | -7.212    | -3.739262 | 0.257457  |
| H  | -7.311521 | -3.845318 | -1.514676 |
| H  | -7.901361 | -2.394790 | -0.661994 |
| H  | -5.417405 | -2.248025 | -2.793179 |
| H  | -6.617785 | -1.190035 | -2.082947 |
| H  | -4.344509 | -0.117353 | -2.696704 |
| H  | -0.741953 | -0.629327 | 0.913778  |
| H  | -4.446169 | -0.572846 | 0.324135  |
| H  | 1.495898  | -0.775560 | -0.809056 |
| H  | 3.433144  | 0.053255  | -2.082202 |
| O  | -0.269586 | -1.476654 | 0.919610  |
| C  | -4.737368 | -3.512131 | -0.597174 |
| H  | -4.837436 | -4.055771 | 0.347268  |
| H  | -4.744121 | -4.253337 | -1.420344 |
| H  | -3.765016 | -3.015960 | -0.597835 |
| C  | 5.872353  | 0.828823  | -1.124780 |
| F  | 5.844533  | 2.195017  | -1.171863 |
| F  | 7.066142  | 0.488172  | -0.571219 |
| F  | 5.894855  | 0.399587  | -2.413239 |

**Compound 7**

**Bond Energy -3.63585314 a.u.**

|    |           |           |           |
|----|-----------|-----------|-----------|
| Se | -0.425902 | 1.868544  | 0.712233  |
| C  | -1.766419 | 0.526881  | 0.390634  |
| C  | -3.035623 | 0.969160  | -0.004977 |
| C  | -4.054763 | 0.050668  | -0.225523 |
| C  | -3.820761 | -1.318726 | -0.060639 |
| C  | -2.552300 | -1.753606 | 0.328803  |
| C  | -1.528679 | -0.838310 | 0.561408  |
| H  | -3.239403 | 2.028078  | -0.147536 |
| H  | -5.034295 | 0.405641  | -0.529928 |
| H  | -2.356450 | -2.812438 | 0.463625  |

|   |           |           |           |   |           |           |           |
|---|-----------|-----------|-----------|---|-----------|-----------|-----------|
| H | -0.553307 | -1.189026 | 0.880643  | F | -4.736461 | -3.497850 | 0.270891  |
| O | 1.042504  | 0.828234  | 1.007607  | F | -4.994261 | -2.588069 | -1.697331 |
| H | 1.462651  | 0.723379  | 0.140827  | F | -6.144148 | -1.848790 | 0.00476   |
| C | -4.919048 | -2.310959 | -0.361369 |   |           |           |           |
